# Supplementary material for: A pilot double-blind randomised placebo-controlled dose–response trial assessing the effects of melatonin on infertility treatment (MIART): study protocol
Source: PubMed Central journal article supplement — BMJ Open. 2014 Aug 30;4(8):e005986. doi: 10.1136/bmjopen-2014-005986 (PMC4156817; doi:10.1136/bmjopen-2014-005986), 2014-08-30
Supplement: bmjopen-2014-005986.draft_revisions.pdf [file bmjopen-2014-005986.draft_revisions.pdf]

# BMJ Open

## A pilot double-blind randomised placebo-controlled dose-response trial assessing the effects of melatonin on infertility treatment (MIART): study protocol

|                                 |                                                                                                                                                                                                                                                                                                                                                                                                                                                                                                 |
|---------------------------------|-------------------------------------------------------------------------------------------------------------------------------------------------------------------------------------------------------------------------------------------------------------------------------------------------------------------------------------------------------------------------------------------------------------------------------------------------------------------------------------------------|
| Journal:                        | <i>BMJ Open</i>                                                                                                                                                                                                                                                                                                                                                                                                                                                                                 |
| Manuscript ID:                  | bmjopen-2014-005986                                                                                                                                                                                                                                                                                                                                                                                                                                                                             |
| Article Type:                   | Protocol                                                                                                                                                                                                                                                                                                                                                                                                                                                                                        |
| Date Submitted by the Author:   | 27-Jun-2014                                                                                                                                                                                                                                                                                                                                                                                                                                                                                     |
| Complete List of Authors:       | Fernando, Shavi; Monash University, Department of Obstetrics and Gynaecology<br>Osianlis, Tiki; Monash University, Department of Obstetrics and Gynaecology<br>Vollenhoven, Beverley; Monash University, Department of Obstetrics and Gynaecology<br>Wallace, Euan; Monash University, Department of Obstetrics and Gynaecology; MIMR-PHI, Institute of Medical Research<br>Rombauts, Luk; Monash University, Department of Obstetrics and Gynaecology; MIMR-PHI, Institute of Medical Research |
| <b>Primary Subject Heading</b>: | Obstetrics and gynaecology                                                                                                                                                                                                                                                                                                                                                                                                                                                                      |
| Secondary Subject Heading:      | Reproductive medicine                                                                                                                                                                                                                                                                                                                                                                                                                                                                           |
| Keywords:                       | Reproductive medicine < GYNAECOLOGY, Subfertility < GYNAECOLOGY, Sex steroids & HRT < DIABETES & ENDOCRINOLOGY                                                                                                                                                                                                                                                                                                                                                                                  |
|                                 |                                                                                                                                                                                                                                                                                                                                                                                                                                                                                                 |

SCHOLARONE™  
Manuscripts

1  
2  
3  
4  
5  
6  
7  
8  
9  
10  
11  
12  
13  
14  
15  
16  
17  
18  
19  
20  
21  
22  
23  
24  
25  
26  
27  
28  
29  
30  
31  
32  
33  
34  
35  
36  
37  
38  
39  
40  
41  
42  
43  
44  
45  
46  
47  
48  
49  
50  
51  
52  
53  
54  
55  
56  
57  
58  
59  
60

# A pilot double-blind randomised placebo-controlled dose-response trial assessing the effects of melatonin on infertility treatment (MIART): study protocol

## Corresponding Author:

Dr Shavi Fernando

shavif@hotmail.com

## Authors:

Dr Shavi Fernando

MBBS(hon) BMedSc(hon)

MIMR-PHI Institute of Medical Research 246 Clayton rd, Clayton Victoria Australia 3168

Department of Obstetrics and Gynaecology, Monash University, Clayton, Victoria Australia

Level 5, Monash Medical Centre, Clayton rd, Clayton, Victoria Australia 3168

Dr Tiki Osianlis

BSc(hon) PhD

Department of Obstetrics and Gynaecology, Monash University, Clayton, Victoria Australia

Monash IVF, 252 Clayton Rd, Clayton, Victoria Australia 3168

A/Prof Beverley Vollenhoven

MD PhD FRANZCOG CREI

Department of Obstetrics and Gynaecology, Monash University, Clayton Australia

Level 5, Monash Medical Centre, Clayton rd, Clayton, Victoria Australia 3168

Prof Euan Wallace

MBChB MD FRCOG FRANZCOG

MIMR-PHI Institute of Medical Research 246 Clayton rd, Clayton Victoria Australia 3168

1 Department of Obstetrics and Gynaecology, Monash University, Clayton, Australia

2  
3 Level 5, Monash Medical Centre, Clayton rd, Clayton, Victoria Australia 3168

4  
5  
6  
7 A/Prof Luk Rombauts

8  
9 MD PhD FRANZCOG CREI

10 MIMR-PHI Institute of Medical Research 246 Clayton rd, Clayton Victoria Australia 3168

11  
12 Department of Obstetrics and Gynaecology, Monash University, Clayton, Victoria Australia

13  
14  
15 Monash IVF, 252 Clayton Rd, Clayton, Victoria Australia 3168

16  
17  
18  
19  
20 **Trial Sponsor:**

21 The Ritchie Centre, Monash Medical Centre, Clayton rd, Clayton VIC AUS 3168

22  
23 03 95946666

24  
25  
26  
27  
28 **Running Title:** Melatonin in ART - MIART randomised trial: study protocol

29  
30  
31  
32 **Keywords:**

33 Melatonin, assisted reproductive technology (ART), in-vitro fertilization, oxidative stress, protocol

34  
35  
36  
37  
38 **Word Count:** 2796

## Abstract

### Introduction

High levels of oxidative stress can have considerable impact on the outcomes of in-vitro fertilization (IVF). Recent studies have reported that melatonin, a neurohormone secreted from the pineal gland in response to darkness, has significant anti-oxidative capabilities which may protect against the oxidative stress of infertility treatment on gametes and embryos. Early studies of oral melatonin (3-4mg/day) in IVF have suggested favourable outcomes. However, most trials were poorly designed and none have addressed the optimum dose of melatonin. We present a proposal for a pilot double-blind randomised placebo-controlled dose-response trial aimed to determine whether oral melatonin supplementation during ovarian stimulation can improve the outcomes of assisted reproductive technology.

### Methods and analyses

We will recruit 160 infertile women into one of four groups: placebo (n=40); melatonin 2mg twice per day (n=40); melatonin 4mg twice per day (n=40) and melatonin 8mg twice per day (n=40). The primary outcome will be clinical pregnancy rate. Secondary clinical outcomes include oocyte number/quality, embryo number/quality and fertilization rate. We will also measure serum melatonin and the oxidative stress marker, 8-hydroxy- 2'-deoxyguanosine (8-OHdg) at baseline and after treatment and levels of these in follicular fluid at egg pick-up. We will investigate follicular blood flow with Doppler ultrasound, patient sleepiness scores, and pregnancy complications, comparing outcomes between groups. This protocol has been designed in accordance with the SPIRIT 2013 Guidelines.

### Ethics and dissemination:

Ethical approval has been obtained from Monash Health HREC (Ref: 13402B), Monash University HREC (Ref: CF14/523 – 2014000181) and Monash Surgical Private Hospital HREC (Ref: 14107). Data analysis, interpretation and conclusions will be presented at national and international conferences and published in peer-reviewed journals.

**Registration Details:** Version 1. Australian New Zealand Clinical Trials Registry, ACTRN: ACTRN12613001317785. The complete WHO Registration Data Set, as described by the SPIRIT 2013 guidelines is available for viewing at <https://www.anzctr.org.au/Trial/Registration/TrialReview.aspx?id=365376>

**Strengths and limitations**

- This trial is a well-designed pilot study to achieve biochemically and clinically relevant outcomes.
- Significant preliminary research has been performed in order to appropriately design the study to fill gaps in current knowledge.
- This is the first placebo controlled dose-finding trial of melatonin in the field of infertility world-wide and if successful, has the potential to provide a foundation for future large randomised controlled trials.
- Because of constraints of such a pilot study in the infertile population, relatively small numbers of participants are anticipated. To help minimise the effect of this, a cross-over arm will be introduced. It is expected that this limitation will be overcome in future trials that will be designed based on this study.

## Introduction

Humans are aerobic organisms and when oxygen is utilised in metabolic processes, free oxygen radicals are created as a consequence. These radicals are oxidants and contain 'free' valence electrons, making them highly unstable and therefore reactive, capable of causing injury to cells. This occurs by accepting electrons from another molecule (a reductant) in order to reach stability. In doing so, the chemical structure of the reductant is changed, and may no longer be able to perform its designated function. In fact, often the reductant can then produce or sometimes even become an oxidant having the potential to cause oxidative stress in its own right.<sup>1</sup> Anti-oxidative agents are present endogenously and can also be administered exogenously. They are designed to reduce free radicals by donating electrons to stabilise the free radical.<sup>2</sup> The term 'reactive oxygen species' (ROS), not only includes free radicals but also molecularly stable non-radical molecules which contain oxygen and are capable of causing oxidative stress, such as hydrogen peroxide (H<sub>2</sub>O<sub>2</sub>).<sup>3</sup> While ROS are necessary for essential physiological processes, an overabundance can result in cellular and tissue damage and this is commonly referred to as 'oxidative stress'.<sup>4</sup> Oxidative stress can be measured in bodily fluids by markers including 8-hydroxy- 2'-deoxyguanosine (8-Ohdg).<sup>5</sup>

Over recent years, the potential role of oxidative stress in the outcomes of assisted reproductive technology (ART) has been gaining increasing attention, in particular with regards to in-vitro fertilization (IVF) and intracytoplasmic sperm injection (ICSI). This is perhaps not surprising given that ART exposes both oocytes and embryos to high levels of superoxide free radicals during gamete and embryo culture<sup>6</sup>. Indeed, in addition to the culture conditions, *in vitro* the oocytes are not afforded the normal protection of the antioxidant-rich follicular fluid or surrounding cumulus cells, leaving them more susceptible to oxidative damage.<sup>7,8</sup> Reproductive processes such as chromosome segregation (resulting in euploid oocytes), polar body extrusion (necessary for haploid oocytes), fertilization and early cleavage (to avoid arrested embryos) require energy. As the average age of women seeking fertility treatment rises, the level of ROS and subsequent oxidative stress increases, resulting in mitochondrial DNA mutations which in turn affect ATP production in the oocyte. Without the necessary ATP, required cellular processes cannot occur correctly, having a direct effect on the quality of the oocyte, embryo and the final outcome of the IVF procedure.<sup>9,10</sup>

It has been shown that oocyte quality begins to deteriorate immediately following ovulation. This has been thought to be an inflammatory driven oxidative stress process<sup>11</sup> whereby the production of cytokines and proteases is associated with an increase in ROS which in turn impair oocyte maturation.<sup>12-14</sup> Evidence of oxidative damage in *in vitro* oocytes has been shown to exist as early as 8 hours after ovulation.<sup>15</sup> Nor surprisingly it has been shown that high levels of the oxidative stress in the follicular fluid of infertile women are associated with poor oocyte maturation and embryo quality, and that inducers of oxidative stress can be used to inhibit oocyte maturation.<sup>5,12</sup>

1  
2 Together, these observations highlighting the importance of oxidative stress in the developing  
3 follicle and in the future success of fertilization, whether *in vivo* or *in vitro*.  
4

5 Recently, it has been shown that melatonin, a neurohormone secreted from the pineal gland, has  
6 important oxygen-scavenging properties which naturally mitigate oxidative stress by both  
7 neutralising ROS in human tissues and by inducing endogenous anti-oxidant enzymes.<sup>16-18</sup>

8 Melatonin has been shown to be beneficial as an adjuvant therapy in the management of many  
9 medical conditions in which oxidative stress has been implicated including diabetes, glaucoma,  
10 irritable bowel syndrome and fertility.<sup>19-22</sup>  
11

12 The effects of melatonin supplementation on culture media,<sup>12, 21, 23-27</sup> gametes,<sup>5, 15, 28</sup> embryos<sup>15,</sup>  
13 <sup>29, 30</sup> and luteal function<sup>31-35</sup> have been identified as useful areas for investigation. Human clinical  
14 studies have begun recently, with emphasis on oral supplementation of melatonin during the  
15 stimulation cycle and its effects on oocyte and embryo quality.<sup>12, 36-39</sup>  
16

17 Importantly, melatonin has a remarkably benign safety profile in both animal and human studies.  
18 A mouse study investigating dose-related effects of melatonin on ovarian grafts found that doses  
19 at 200mg/kg/day have immunosuppressant effects, leading to prolongation of graft survival,  
20 however, also resulted in a reduction in healthy follicles. They concluded that doses of greater  
21 than 20mg/kg/day resulted in a reduction in both healthy follicles and ovarian size.<sup>40</sup> The maternal  
22 lowest observed adverse effect level (LOAEL), the lowest level at which an adverse event was  
23 observed, appears to be around 200mg/kg/day, equivalent to over 1g per day for humans.  
24 Furthermore, in rodent studies, no significant adverse effects on either the embryo or fetus have  
25 been reported for up to doses of 200mg/kg/day.<sup>41</sup> There have been several randomised controlled  
26 trials addressing high doses of melatonin in human adults and children,<sup>42-46</sup> and reports have  
27 established that toxicity levels in humans are not reached until a daily dose of at least 5mg/kg.<sup>47</sup>  
28  
29  
30  
31  
32  
33  
34  
35  
36  
37

### 38 Rationale

39 In the USA in 2011, only 1 in 4 of all IVF cycles resulted in clinical pregnancy with less than 1 in 5  
40 cycles resulting in live birth<sup>48</sup>. That is 4 out of 5 IVF cycles do not result in a live baby. Clearly there  
41 is much room for further improvement, if only to meet societal expectations and reduce  
42 healthcare costs. Continued research into novel adjuvant therapies designed to improve IVF  
43 outcomes is therefore merited. Several human and animal studies support the use of melatonin in  
44 the treatment of infertility, with beneficial actions being largely attributed to its anti-oxidant  
45 properties. Furthermore, melatonin receptors are found on granulosa cells, oocytes and  
46 embryos,<sup>49</sup> with intrafollicular melatonin concentrations being significantly higher than those  
47 found in serum, again suggesting a physiological role in reproduction.<sup>39, 67, 68</sup> The human studies  
48 addressing the use of melatonin in infertility treatment undertaken to date have been small and  
49 not placebo-controlled. None have attempted to identify an optimal dose.<sup>36-38, 50</sup> Further,  
50 interpretation of any outcomes have been hampered by the within-patient comparison design,  
51 where patients act as their own controls.<sup>12, 39, 51</sup>  
52  
53  
54  
55  
56  
57  
58  
59  
60

1 We have designed this study to be the first placebo-controlled, dose-finding clinical trial to  
2 investigate the effect(s), if any, of oral melatonin on the clinical pregnancy rate following IVF/ICSI  
3 treatment.  
4  
5  
6  
7

### 8 **Aims**

9  
10 The overall aim of this trial is to determine whether oral melatonin administration can improve the  
11 outcomes of IVF/ICSI. In order to address this, we will determine whether melatonin  
12 administration has a dose-response effect in women undergoing IVF/ICSI on:  
13  
14

- 15 1. biochemical markers of follicle and oocyte health (melatonin, 8-hydroxy- 2'-  
16 deoxyguanosine (8-OHdg), progesterone, oestradiol)
  - 17 2. sonographic markers of follicle health
  - 18 3. patient sleepiness
  - 19 4. pregnancy rate following IVF/ICSI
- 20  
21  
22  
23  
24  
25  
26  
27

### 28 **Methods and analyses**

29  
30 This protocol has been designed in accordance with the SPIRIT 2013 Guidelines.<sup>52</sup> Recruitment will  
31 commence in July 2014. This will occur over two years. Analysis and dissemination will occur after  
32 this period of time. The study is expected to be completed by February 2017.  
33  
34  
35  
36  
37

### 38 **Study design**

39 Pilot phase II cross-over double-blinded randomised placebo-controlled dose-response trial  
40  
41  
42

### 43 **Subjects**

44 We plan to recruit a total of 160 infertile women undergoing IVF/ICSI.  
45  
46  
47  
48  
49

### 50 **Study setting**

51  
52 Patients will be recruited from Monash IVF infertility clinics in Melbourne, Australia over a period  
53 of 2 years.  
54  
55  
56  
57  
58  
59  
60



## Interventions to be measured

This trial will have four arms. All capsules will be indistinguishable from each other.

1. Placebo capsule taken twice per day
2. 2mg melatonin capsule twice per day (4mg/d total)
3. 4mg melatonin capsule twice per day (8mg/d total)
4. 8mg melatonin capsule twice per day (16mg/d total)

## Primary Outcome

Clinical pregnancy rate, defined as the presence of a live pregnancy in the uterine cavity at a transvaginal ultrasound (TVUS) at 6-8 weeks' gestation

## Secondary outcomes

See *Table 1* for details.

## Sample Size

As this is a pilot dose-finding study, without precedence on which to base accurate power calculations, a power calculation has not been performed. Part of our aim is to provide clarification allowing for larger randomised trials to be designed in the future. We have chosen a convenience sample of 160 participants, 40 in each of the four groups, in order to assess plausible morphological, biochemical and sonographic surrogate markers for oocyte quality, as well as to provide an indication of the effect size for each dose for our primary outcome, clinical pregnancy rate. Conservatively estimating that, in total, 50% of patients (n=80) do not get pregnant after their first cycle, we may assume that 60 patients will participate in the crossover arm (allowing for drop-outs) in their second cycle and be allocated to a different treatment group.

## Inclusion criteria

1. Undergoing first cycle of IVF or ICSI
2. Age between 18 and 45
3. Body mass index (BMI) between 18 and 35

- 1
  - 2
  - 3
  - 4
  - 5
  - 6
  - 7
  - 8
  - 9
  - 10
  - 11
  - 12
  - 13
  - 14
  - 15
  - 16
  - 17
  - 18
  - 19
  - 20
  - 21
  - 22
  - 23
  - 24
  - 25
  - 26
  - 27
  - 28
  - 29
  - 30
  - 31
  - 32
  - 33
  - 34
  - 35
  - 36
  - 37
  - 38
  - 39
  - 40
  - 41
  - 42
  - 43
  - 44
  - 45
  - 46
  - 47
  - 48
  - 49
  - 50
  - 51
  - 52
  - 53
  - 54
  - 55
  - 56
  - 57
  - 58
  - 59
  - 60
4. Undergoing a GnRH antagonist cycle (without OCP scheduling)

#### Exclusion criteria

1. Current untreated pelvic pathology – moderate to severe endometriosis, submucosal uterine fibroids/polyps assessed by the treating specialist to affect fertility, pelvic inflammatory disease, uterine malformations, Asherman's syndrome and hydrosalpinx.
2. Currently enrolled in another interventional clinical trial
3. Concurrent use of other adjuvant therapies (eg. Chinese herbs, acupuncture)
4. Current pregnancy
5. Malignancy or other contraindication to IVF
6. Autoimmune disorders
7. Undergoing preimplantation genetic diagnosis (PGD)
8. Hypersensitivity to melatonin or its metabolites
9. Concurrent use of any of the following medications
  - a. Fluvoxamine (eg. Luvox, Movox, Voxam)
  - b. Cimetidine (eg. Magicul, Tagamet)
  - c. Quinolones and other CYP1A2 inhibitors (Ciprofloxacin, Avalox)
  - d. Carbamazepine (eg. Tegretol), rifampicin (eg. Rifadin) and other CYP1A2 inducers
  - e. Zolpidem (eg. Stilnox), zopiclone (eg. Imovane) and other non-benzodiazepine hypnotics
10. Inability to comply with trial protocol

#### Concomitant care

Aside from trial protocol and inclusion/exclusion criteria listed above, standard concomitant care, such as folic acid supplements, is permitted.

#### Participant enrolment

1  
2  
3  
4  
5  
6  
7  
8  
9  
10  
11  
12  
13  
14  
15  
16  
17  
18  
19  
20  
21  
22  
23  
24  
25  
26  
27  
28  
29  
30  
31  
32  
33  
34  
35  
36  
37  
38  
39  
40  
41  
42  
43  
44  
45  
46  
47  
48  
49  
50  
51  
52  
53  
54  
55  
56  
57  
58  
59  
60

This trial will begin recruitment at the level of the infertility specialist. Once identified as requiring IVF/ICSI, and satisfying inclusion and exclusion criteria, the patient will be provided with detailed written information about the trial protocol. After approximately one week, the patient will be approached and written informed consent will be obtained by the principle investigator at the first visit with the infertility clinic nurse. Baseline bloods will then be taken and the patient will be randomised by the principle investigator (see below) to one of the study arms and provided with the trial medication. The participant will commence taking the trial medication on the day that ovarian stimulation injections begin (Day 2-3 of menses) at 0800 and 2200 each day, with the last capsule being taken at 2200 the night before oocyte collection.

For a summarised participant timeline, See *Figure 1* and *Figure 2*.

### Allocation concealment, blinding and randomisation

Each treatment arm will be randomly allocated a letter (A, B, C or D) by way of opaque sealed envelope. Randomisation will be computerised and patients will be randomised at a ratio of 1:1:1:1 to one of the groups, A-D, using the minimisation method, a method of randomisation accounting for factors known to affect the outcome used in small trials to prevent selection bias.<sup>53</sup>

With a crossover design improved patient recruitment is very likely because all non-pregnant participants will be guaranteed at least one cycle with one of the doses of melatonin.<sup>54</sup> After completing the first study cycle, those participants that are not pregnant will be recruited for the cross-over cycle in which they will be assigned the next treatment arm. For example, if a participant were allocated to treatment group A in their first cycle and did not become pregnant, they would be offered allocation to group B in their second cycle and so on.

Participants will be blinded by receiving identical-appearing unmarked capsules. All trial researchers will be blinded to treatment allocation group until after analyses are performed at the completion of the trial. A Data Safety Monitoring Committee (see *Adverse events* for details) and dispensing pharmacy will be aware of allocation to allow identification of any unbalanced or multiple serious adverse events that may necessitate emergency unblinding of researchers and participants.

### Adherence and retention

In order to ensure the integrity of study data, participant adherence to trial protocol will be assessed on a medication administration record updated daily by the participant. At oocyte collection, participants will return medication bottles and compliance will be confirmed by counting remaining tablets. This will be recorded on individual patient compliance forms and patient record forms. Every reasonable effort will be made from the time of enrolment until the end of follow-up to maintain contact with and maintain subject participation in the trial.

### Analysis plan

SPSS v22.0 (IBM, Armonk, New York) will be used for data analysis. Primary analysis will occur by the intention-to-treat principle. A secondary analysis will be performed for 'actual treatment received'. Statistical analyses will be performed using Chi-square tests for dichotomous categorical outcome variables. Clinical and demographic data will be analysed with parametric tests if they are normally distributed (ANOVA with Bonferroni adjustment), otherwise appropriate non-parametric tests will be implemented (Kruskal-Wallis for between group analyses). Within patient changes (paired data), for example when comparing serum levels of melatonin at baseline and after treatment, will be compared using repeated measures ANOVA or Wilcoxon signed rank test depending on normality of data.  $P < 0.05$  will be considered statistically significant. Where statistically sound, adjusted odds ratios will be calculated to account for confounders or effect modifiers. To account for missing data, two analyses will be run, with the first excluding missing values and the second by imputation of missing values to determine how conclusions are affected.

### Adverse events and data safety and monitoring

An independent Data Safety and Monitoring Committee (DSMC) has been established at Monash Health in order to monitor occurrences of adverse events. The principle investigator will be available by telephone at all times during the trial and participants will be provided with contact details in case of any adverse events. Participants will also be interviewed at the time of their ultrasound and the day of oocyte collection to ascertain the occurrence of any adverse events. Serious adverse events will be recorded separately and followed up until resolution. Such events will be reported to the Monash Health, Monash University, Monash Surgical Private Hospital and Epworth HealthCare Human Research Ethics Committees, the Monash Health DSMC, the Monash Health Therapeutics Committee and, if directed by HREC, to the Australian Therapeutics and Goods Administration.

### Trial modification and discontinuation

In the absence of adverse events, the medication regimen will not be modified once commenced. If other protocol changes are deemed necessary by the investigating team, ethics approval will be sought from all approving Human Research Ethics Committees. Once approved, protocol amendments will be notified to all investigators, administrators (eg. dispensing pharmacy) and trial participants via telephone.

Patients are permitted to discontinue their inclusion in the trial at any point in time at their request or following an unexpected serious adverse event as described above. The DSMC will perform an interim analysis specifically assessing adverse events after 50% of participants have

1  
2  
3  
4  
5  
6  
7  
8  
9  
10  
11  
12  
13  
14  
15  
16  
17  
18  
19  
20  
21  
22  
23  
24  
25  
26  
27  
28  
29  
30  
31  
32  
33  
34  
35  
36  
37  
38  
39  
40  
41  
42  
43  
44  
45  
46  
47  
48  
49  
50  
51  
52  
53  
54  
55  
56  
57  
58  
59  
60

been recruited. Otherwise, the trial will cease follow-up once patients have given birth from a trial treatment cycle.

### **Data collection, informed consent forms and confidentiality**

Data will be recorded in both hardcopy and electronic form. Hardcopies will be stored in a secured filing cabinet at the administering institution. Electronic copies will be stored in encrypted files on a password protected computer. All data will be kept for 15 years, following this time, hardcopies will be destroyed by shredding or burning and electronic copies will be deleted by formatting.

Organic samples will be stored until analysis in a secured locked temperature-controlled freezer at the Monash Institute of Medical Research that can only be accessed by authorized staff. Samples and participant records will not contain any directly identifiable information. No additional biological samples will be kept for use in ancillary studies.

For access to data collection forms, including sleep diaries, medication compliance and informed consent forms please contact the principle investigator.

### **Ethics and dissemination**

Ethical approval has been obtained from Monash Health HREC (Ref:13402B), Monash University HREC (Ref: CF14/523 – 2014000181) and Monash Surgical Private Hospital HREC (Ref: 14107). Data analysis, interpretation and conclusions will be presented at national and international conferences and published in peer-reviewed journals. De-identified summary results will also be made publically available on the Monash IVF website.

### **Discussion**

The MIART trial has the potential to improve IVF treatment protocols, with both immediate and translational benefit to patients. If melatonin is found to improve outcomes after IVF/ICSI, it may become a routine part of management of the infertile couple. We aim to set precedence and a framework by which others may structure further investigation into melatonin and other adjuvant therapies in the future. The intention of this study is as a pilot trial, primarily designed to provide un-biased data as a foundation for further research into this area. It is anticipated that the effect size observed in this trial will be useful to more appropriately power subsequent RCTs with the most effective dose of melatonin. In summary, MIART will be the first trial designed to determine a dose-response relationship of melatonin on biochemical and physiological markers of follicle health and also clinical pregnancy rates.

### **Contributors:**

1  
2 The idea for the trial was conceived by SF, LR, and EW. SF was involved in research design and  
3 primary writing of study protocol and manuscript. TO was involved in the design and writing of the  
4 manuscript. LR and EW were involved in the trial design, writing, editing and approval of the final  
5 manuscript.  
6

## 7 8 **Funding**

9  
10 Funding statement: This work is supported both financially and in-kind by the Monash IVF  
11 Research and Education Foundation who peer-reviewed this study prior to the approval of  
12 funding. In-kind and financial support was also afforded by The Department of Obstetrics and  
13 Gynaecology, Monash University and The Ritchie Centre, MIMR-PHI. No funding agency had a role  
14 in the design, implementation or analysis of this trial.  
15  
16

## 17 18 **Conflict of interest statement**

19  
20 SF is supported by an NHMRC Postgraduate Scholarship. No conflicts of interest are identified for  
21 SF, EW or TO. BV and LR are minority shareholders in Monash IVF. LR has received unconditional  
22 research and educational grants from MSD® and Merck Serono®. The trial sponsor had no  
23 influence on trial design, implementation, analysis or presentation.  
24  
25  
26  
27

## 28 29 **References**

- 30 1. Kojo S. Vitamin C: basic metabolism and its function as an index of oxidative stress. *Curr Med Chem* 2004;11:1041-64.
- 31 2. Rahman K. Studies on free radicals, antioxidants, and co-factors. *Clin Interv Aging* 2007;2:219-36.
- 32 3. Bouayed J, Bohn T. Exogenous antioxidants - Double-edged swords in cellular redox state: Health  
33 beneficial effects at physiologic doses versus deleterious effects at high doses. *Oxid Med Cell Longev*  
34 2010;3:228-37.
- 35 4. Valko M, Leibfritz D, Moncol J, Cronin M, Mazur M, Telser J. Free radicals and antioxidants in  
36 normal physiological functions and human disease. *Int J Biochem Cell Biol* 2007;39:44-84.
- 37 5. Tamura H, Takasaki A, Taketani T *et al*. The role of melatonin as an antioxidant in the follicle. *J*  
38 *Ovarian Res* 2012;5.
- 39 6. Guerin P, El Moutassim S, Menezo Y. Oxidative stress and protection against reactive oxygen  
40 species in the pre-implantation embryo and its surroundings. *Hum Reprod Update* 2001;7:175-89.
- 41 7. Yoshida M, Ishigati K, Nagai T, Chikyu M, Pursel V. Glutathione concentration during maturation  
42 and after fertilization in pig oocytes: relevance to the ability of oocytes to form male pronucleus. *Biol Reprod*  
43 1993;49:89-94.
- 44 8. Fatehi A, Roelen B, Colenbrander B *et al*. Presence of cumulus cells during in vitro fertilization  
45 protects the bovine oocyte against oxidative stress and improves first cleavage but does not affect further  
46 development. *Zygote* 2005;13:177-85.
- 47 9. Zeng H, Ren Z, Yeung W *et al*. Low mitochondrial DNA and ATP contents contribute to the absence  
48 of birefringent spindle imaged with PolScope in in vitro matured human oocytes. *Hum Reprod*  
49 2007;22:1681-6.
- 50 10. Van Blerkom J, Davis P, Lee J. ATP content of human oocytes and developmental potential and  
51 outcome after in-vitro fertilization and embryo transfer *Hum Reprod* 1995;10:415-24.
- 52 11. Espey L. Current status of the hypothesis that mammalian ovulation is comparable to an  
53 inflammatory reaction. *Biol Reprod* 1994;50:233-8.

12. Tamura H, Takasaki A, Miwa I *et al*. Oxidative stress impairs oocyte quality and melatonin protects oocytes from free radical damage and improves fertilization rate. *J Pineal Res* 2008;44:280-7.
13. Tamura H, Taketani T, Takasaki A, Sugino N. Influence of oxidative stress on oocyte quality and protective role of melatonin as an antioxidant. In: 20th World Congress on Fertility and Sterility, IFFS 2010. Vol. 7. Munich, Germany: Journal fur Reproduktionsmedizin und Endokrinologie, 2010:366.
14. Reiter R, Rosales-Corral S, Manchester L, Tan D. Peripheral reproductive organ health and melatonin: ready for prime time. *Int J Mol Sci* 2013;14:7231-72.
15. Lord T, Nixon B, Jones KT, Aitken RJ. Melatonin prevents postovulatory oocyte aging in the mouse and extends the window for optimal fertilization in vitro. *Biol Reprod* 2013.
16. Wood S, Quinn A, Troupe S, Kingsland C, Lewis-Jones I. Seasonal variation in assisted conception cycles and the influence of photoperiodism on outcome in in vitro fertilization cycles. *Hum Fertil* 2006;9:223-9.
17. Agarwal A, Gupta S, Sharma RK. Role of oxidative stress in female reproduction. *Reprod Biol Endocrinol* 2005;3.
18. Srinivasan V, Spence W, Pandi-Perumal SR., Zakharia R, Bhatnagar K, Brzezinski A. Melatonin and human reproduction: shedding light on the darkness hormone. *Gynecol Endocrinol* 2009;25:779-85.
19. Dholpuria S, Vyas S, Purohit GN, Pathak KML. Sonographic monitoring of early follicle growth induced by melatonin implants in camels and the subsequent fertility. *J Ultrasound* 2012;15:135-41.
20. Abecia JA, Palacin I, Forcada F, Valares JA. The effect of melatonin treatment on the ovarian response of ewes to the ram effect. *Domest Anim Endocrinol* 2006;31:52-62.
21. Rodriguez-Osorio N, Kim I, Wang H, Kaya A, Memili E. Melatonin increases cleavage rate of porcine preimplantation embryos in vitro. *J Pineal Res* 2007;43:283-8.
22. Sanchez-Barcelo EJ, Mediavilla MD, Tan DX, Reiter RJ. Clinical uses of melatonin: Evaluation of human trials. *Curr Med Chem* 2010;17:2070-95.
23. Ishizuka B, Kuribayashi Y, Murai K, Amemiya A, Itoh M. The effect of melatonin on in vitro fertilization and embryo development in mice. *J Pineal Res* 2000;28:48-51.
24. Choi J, Park S, Lee E *et al*. Anti-apoptotic effect of melatonin on preimplantation development of porcine parthenogenetic embryos. *Mol Reprod Dev* 2008;75:1127-35.
25. Kang J, Koo O, Kwon D *et al*. Effects of melatonin on in vitro maturation of porcine oocyte and expression of melatonin receptor RNA in cumulus and granulosa cells. *J Pineal Res* 2009;46:22-8.
26. Wei D, Zhang C, Xie J *et al*. Supplementation with low concentrations of melatonin improves nuclear maturation of human oocytes in vitro. *J Assist Reprod Genet* 2013;30:933-8.
27. Kim M, Park E, Kim H *et al*. Does supplementation of in-vitro culture medium with melatonin improve IVF outcome in PCOS? *Reprod Biomed Online* 2013;26:22-9.
28. Knapen M, Zusterzeel P, Peters W, Steegers E. Glutathione and glutathione-related enzymes in reproduction: a review. *Eur J Obstet Gynecol Reprod Biol* 1999;82:171-84.
29. Eryilmaz O, Devran A, Sarikaya E, Aksakal F, Mollamahmutoglu L, Cicek N. Melatonin improves the oocyte and the embryo in IVF patients with sleep disturbances, but does not improve the sleeping problems. *J Assist Reprod Genet* 2011;28:815-20.
30. Batioğlu A, Şahin U, Gürlek B, Öztürk N, Ünsal E. The efficacy of melatonin administration on oocyte quality. *Gynecological Endocrinology* 2012;28:91-3.
31. Taketani T, Tamura H, Takasaki A *et al*. Protective role of melatonin in progesterone production by human luteal cells. *J Pineal Res* 2011;51:207-13.
32. Manca M, Manunta M, Spezzigu A *et al*. Melatonin deprivation modifies follicle and corpora lutea growth dynamics in a sheep model (Epub ahead of print). *Reproduction* 2014.
33. Baratta M, Tamanini C. Effect of melatonin on the in vitro secretion of progesterone and estradiol 17 beta by ovine granulosa cells. *Acta Endocrinol (Copenh)* 1992 127:366-70.
34. Wallace J, Robinson J, Wigzell S, Aitken R. Effect of melatonin on the peripheral concentrations of LH and progesterone after oestrus, and on conception rate in ewes. *J Endocrinol* 1988 119:523-30.
35. Zhang L, Chai M, Tian X *et al*. Effects of melatonin on superovulation and transgenic embryo transplantation in small-tailed han sheep (*Ovis aries*). *Neuro Endocrinol Lett* 2013;34:294-301.



- 1  
2  
3  
4  
5  
6  
7  
8  
9  
10  
11  
12  
13  
14  
15  
16  
17  
18  
19  
20  
21  
22  
23  
24  
25  
26  
27  
28  
29  
30  
31  
32  
33  
34  
35  
36  
37  
38  
39  
40  
41  
42  
43  
44  
45  
46  
47  
48  
49  
50  
51  
52  
53  
54  
55  
56  
57  
58  
59  
60
36. Rizzo P, Raffone E, Benedetto V. Effect of the treatment with myo-inositol plus folic acid plus melatonin in comparison with a treatment with myo-inositol plus folic acid on oocyte quality and pregnancy outcome in IVF cycles. A prospective, clinical trial. *EmbaseEuropean Review for Medical and Pharmacological Sciences* 2010;14:555-61.
37. Nazzaro A, Salerno A, Marino S, Granato C, Pastore E. The addiction of melatonin to myo-inositol plus folic acid improve oocyte quality and pregnancy outcome in IVF cycle. A prospective clinical trial. . In: 27th Annual Meeting of the European Society of Human Reproduction and Embryology, ESHRE. Vol. 26. Stockholm Sweden: *EmbaseHuman Reproduction*, 2011:i227-i8.
38. Pacchiarotti A, Carlomagno G, Unfer V, Frati P, Pacchiarotti A, Prapas N. Role of Myo-inositol and melatonin supplementation in follicular fluid of IVF patients with polycystic ovarian syndrome: a randomized controlled trial. *ClinicalTrialsgov* 2013.
39. Unfer V, Raffone E, Rizzo P, Buffo S. Effect of a supplementation with myo-inositol plus melatonin on oocyte quality in women who failed to conceive in previous in vitro fertilization cycles for poor oocyte quality: a prospective, longitudinal, cohort study. *Gynaecol Endocrinol* 2011;27:857-61.
40. Hemadi M, Shokri S, Pourmatroud E, Moramezi F, Khodadai A. Follicular dynamic and immunoreactions of the vitrified ovarian graft after host treatment with variable regimens of melatonin. *Am J Reprod Immunol* 2012;67:401-12.
41. Jahnke G, Marr M, Myers C, Wilson R, Travlos G, Price C. Maternal and developmental toxicity evaluation of melatonin administered orally to pregnant Sprague-Dawley rats. *Toxicol Sci* 1999;50:271-9.
42. Gonciarz M, Gonciarz Z, Bielanski W *et al*. The effects of long-term melatonin treatment on plasma liver enzymes levels and plasma concentrations of lipids and melatonin in patients with nonalcoholic steatohepatitis: a pilot study. *J Physiol Pharmacol* 2012;63:35-40.
43. de Lourdes V, Seabra M, Bignotto M, Pinto Jr L, Tufik S. Randomized, double-blind clinical trial, controlled with placebo, of the toxicology of chronic melatonin treatment. *J Pineal Res* 2000;29:193-200.
44. Goldberg-Stern H, Oren H, Peled N, Garty B. Effect of melatonin on seizure frequency in intractable epilepsy: a pilot study. *J Child Neurol* 2012;27:1524-8.
45. Del Fabbro E, Dev R, Hui D, Palmer L, Bruera E. Effects of melatonin on appetite and other symptoms in patients with advanced cancer and cachexia: a double-blind placebo-controlled trial. *J Clin Oncol* 2013;31:1271-6.
46. Voordouw B, Euser R, Verdonk R *et al*. Melatonin and melatonin-progestin combinations alter pituitary-ovarian function in women and can inhibit ovulation. *J Clin Endocrinol Metab* 1992;74:108-17.
47. Weaver D. Reproductive safety of melatonin: a "wonder drug" to wonder about. *J Biol Rhythms* 1997;12:682.
48. . Centers for Disease Control and Prevention, American Society for Reproductive Medicine, Society for Assisted Reproductive Technology. 2011 Assisted reproductive technology fertility clinic success rates report. In. Atlanta (GA): US Dept of Health and Human Services, 2013.
49. Sampaio R, Conceição S, Miranda M, Sampaio Lde F, Ohashi O. MT3 melatonin binding site, MT1 and MT2 melatonin receptors are present in oocyte, but only MT1 is present in bovine blastocyst produced in vitro. *Reprod Biol Endocrinol* 2012;10.
50. Ciotta L, Stracquadanio M, Pagano I, Carbonaro A, Palumbo M, Gulino F. Effects of myo-inositol supplementation on oocyte's quality in PCOS patients: a double blind trial. *Eur Rev Med Pharmacol Sci* 2011;15:509-14.
51. Nishihara T, Hashimoto S, Ito K *et al*. Oral melatonin supplementation improves oocyte and embryo quality in women undergoing in vitro fertilization-embryo transfer. *Gynecol Endocrinol* 2014;30:359-62.
52. Chan A, Tetzlaff J, Gøtzsche P *et al*. SPIRIT 2013 explanation and elaboration: guidance for protocols of clinical trials. *BMJ* 2013;346.
53. Altman D, Bland J. Treatment allocation by minimisation. *BMJ* 2005;330:843.
54. Piantadosi S. *Clinical Trials: A Methodologic Perspective*. Wiley Series in Probability and Statistics. 2nd ed: John Wiley & Sons, 2013.



## Figure Legends

### Table 1: Clinical Secondary Outcomes

OHSS: Ovarian Hyperstimulation syndrome; hCG: human chorionic gonadotrophin; 8-OHdg: 8-hydroxy- 2'-deoxyguanosine

<sup>a</sup>Reyner L, Horne J. Falling asleep whilst driving: are drivers aware of prior sleepiness? Int J Legal Med 1998;111:120-3

### Figure 1: Participant timeline schematic - first cycle

<sup>a</sup>Placebo, melatonin 2mg twice daily, melatonin 4mg twice daily, melatonin 8mg twice daily

hCG: human chorionic gonadotrophin; 8-OHdg: 8-hydroxy- 2'-deoxyguanosine

Note: Patients who are not pregnant after their first cycle will be offered a second cycle with a different trial medication (Figure 2)

### Figure 2: Participant timeline schematic - second cycle in those not pregnant after their first cycle

<sup>a</sup> For participants who do not become pregnant in their first cycle, each will be offered allocation to the next treatment arm for their second cycle (ie. A will be allocated to B, B to C, C to D and D to A)

ET: embryo transfer; hCG: human chorionic gonadotrophin

**Table 1: Clinical Secondary Outcomes**

| <b>Clinical outcomes</b>                    | <b>Definition</b>                                                                                                                                                                                                          |
|---------------------------------------------|----------------------------------------------------------------------------------------------------------------------------------------------------------------------------------------------------------------------------|
| Live birth rate                             | Birth of a live baby after 24 weeks gestation                                                                                                                                                                              |
| Miscarriage rate                            | Loss of a diagnosed clinical pregnancy before 20 weeks gestation                                                                                                                                                           |
| Sleepiness score                            | Based on Karolinska <sup>a</sup> sleepiness scale during trial medication administration                                                                                                                                   |
| Pregnancy complication rate                 | Including OHSS, multiple pregnancy, congenital or chromosomal abnormalities, stillbirth, preeclampsia, delivery before 34 weeks, delivery between 34 and 37 weeks, placenta praevia, gestational diabetes, low birthweight |
| <b>Embryological outcomes</b>               |                                                                                                                                                                                                                            |
| Total number of oocytes collected           |                                                                                                                                                                                                                            |
| Oocyte maturity                             |                                                                                                                                                                                                                            |
| Total number of embryos                     |                                                                                                                                                                                                                            |
| Embryo quality                              |                                                                                                                                                                                                                            |
| Fertilization rate                          | The proportion of oocytes that become fertilised                                                                                                                                                                           |
| Utilisation rate                            | Proportion of zygotes undergoing embryo transfer or cryopreservation to oocytes fertilised                                                                                                                                 |
| <b>Biochemical outcomes</b>                 |                                                                                                                                                                                                                            |
| Biochemical pregnancy rate                  | Presence of serum hCG level of >25IU/l on Day 16 after embryo transfer                                                                                                                                                     |
| Melatonin levels in serum                   | At baseline and prior to oocyte collection                                                                                                                                                                                 |
| Melatonin levels in follicular fluid        | Taken from leading follicle from each ovary at time of oocyte collection                                                                                                                                                   |
| 8-OHdg levels in serum                      | At baseline and prior to oocyte collection                                                                                                                                                                                 |
| 8-OHdg levels in follicular fluid           | Taken from leading follicle from each ovary at time of oocyte collection                                                                                                                                                   |
| Oestradiol and Progesterone levels in serum | Taken at baseline, during treatment and at the time of oocyte collection                                                                                                                                                   |
| <b>Sonographic outcomes</b>                 |                                                                                                                                                                                                                            |
| Follicular blood flow                       | Measured on last transvaginal ultrasound with power Doppler prior to oocyte collection                                                                                                                                     |
| Uterine artery blood flow                   | Measured on last transvaginal ultrasound with power Doppler prior to oocyte collection                                                                                                                                     |

OHSS: Ovarian Hyperstimulation syndrome; hCG: human chorionic gonadotrophin; 8-OHdg: 8-hydroxy-2'-deoxyguanosine

<sup>a</sup>Reyner L, Horne J. Falling asleep whilst driving: are drivers aware of prior sleepiness? Int J Legal Med 1998;111:120-3

Figure 1: Participant timeline schematic - first cycle

|                                                  | Study Period |                         |                 |    |       |           |       |   |
|--------------------------------------------------|--------------|-------------------------|-----------------|----|-------|-----------|-------|---|
|                                                  | Enrolment    | Trial medication beings | Post allocation |    |       | Close out |       |   |
| Timepoint (days)                                 | -7           | 0                       | 8-10            | 14 | 19    | 68        | 299   |   |
| <b>ENROLMENT</b>                                 |              |                         |                 |    |       |           |       |   |
| Eligibility Screen                               | x            |                         |                 |    |       |           |       |   |
| Informed Consent                                 | x            |                         |                 |    |       |           |       |   |
| Allocation                                       | x            |                         |                 |    |       |           |       |   |
| <b>INTERVENTIONS</b>                             |              |                         |                 |    |       |           |       |   |
| Trial Medication <sup>a</sup>                    |              | x                       | —————           | x  |       |           |       |   |
| <b>ASSESSMENTS</b>                               |              |                         |                 |    |       |           |       |   |
| Baseline blood tests                             | x            |                         |                 |    |       |           |       |   |
| Blood tests after treatment                      |              |                         |                 | x  |       |           |       |   |
| Follicular fluid melatonin and 8-OHdg            |              |                         |                 | x  |       |           |       |   |
| Measurement of follicular and uterine blood flow |              |                         | x               |    |       |           |       |   |
| Oocyte assessments                               |              |                         |                 | x  |       |           |       |   |
| Embryo assessments                               |              |                         |                 | x  | ————— | x         |       |   |
| Sleepiness scores                                |              | x                       | —————           | x  |       |           |       |   |
| Pregnancy complication rates and outcomes        |              |                         |                 |    |       | x         | ————— | x |
| Followup hCG                                     |              |                         |                 |    |       | x         | ————— | x |

<sup>a</sup>Placebo, melatonin 2mg twice daily, melatonin 4mg twice daily, melatonin 8mg twice daily

hCG: human chorionic gonadotrophin; 8-OHdg: 8-hydroxy- 2'-deoxyguanosine

Note: Patients who are not pregnant after their first cycle will be offered a second cycle with a different trial medication (Figure 2)

Figure 2: Participant timeline schematic - second cycle in those not pregnant after their first cycle

|                                           | Study Period                      |                                 |                   |    |       |           |       |   |
|-------------------------------------------|-----------------------------------|---------------------------------|-------------------|----|-------|-----------|-------|---|
|                                           | Confirmation of pregnancy failure | Second trial medication begins* | Post reallocation |    |       | Close out |       |   |
| Timepoint (days)                          |                                   | 0                               | 8-10              | 14 | 19    | 68        | 299   |   |
| <b>INTERVENTIONS</b>                      |                                   |                                 |                   |    |       |           |       |   |
| Offer reallocation                        | x                                 |                                 |                   |    |       |           |       |   |
| Trial Medication <sup>a</sup>             |                                   | x                               | —————             | x  |       |           |       |   |
| <b>ASSESSMENTS</b>                        |                                   |                                 |                   |    |       |           |       |   |
| Oocyte assessments                        |                                   |                                 |                   | x  |       |           |       |   |
| Embryo assessments                        |                                   |                                 |                   | x  | ————— | x         |       |   |
| Sleepiness scores                         |                                   | x                               | —————             | x  |       |           |       |   |
| Pregnancy complication rates and outcomes |                                   |                                 |                   |    |       | x         | ————— | x |
| Followup hCG                              |                                   |                                 |                   |    | x     | —————     | x     |   |

<sup>a</sup> For participants who do not become pregnant in their first cycle, each will be offered allocation to the next treatment arm for their second cycle (ie. A will be allocated to B, B to C, C to D and D to A)

ET: embryo transfer; hCG: human chorionic gonadotrophin

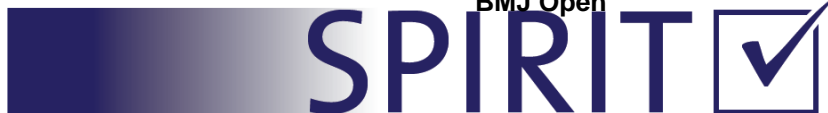

## STANDARD PROTOCOL ITEMS: RECOMMENDATIONS FOR INTERVENTIONAL TRIALS

## SPIRIT 2013 Checklist: Recommended items to address in a clinical trial protocol and related documents\*

| Page(s)                                                   | Section/item               | ItemNo | Description                                                                                                                                                                                                                                                                              |
|-----------------------------------------------------------|----------------------------|--------|------------------------------------------------------------------------------------------------------------------------------------------------------------------------------------------------------------------------------------------------------------------------------------------|
| <b>Administrative information</b>                         |                            |        |                                                                                                                                                                                                                                                                                          |
| 1                                                         | Title                      | 1      | Descriptive title identifying the study design, population, interventions, and, if applicable, trial acronym                                                                                                                                                                             |
| 3                                                         | Trial registration         | 2a     | Trial identifier and registry name. If not yet registered, name of intended registry                                                                                                                                                                                                     |
| 3                                                         |                            | 2b     | All items from the World Health Organization Trial Registration Data Set                                                                                                                                                                                                                 |
| 3                                                         | Protocol version           | 3      | Date and version identifier                                                                                                                                                                                                                                                              |
| 13                                                        | Funding                    | 4      | Sources and types of financial, material, and other support                                                                                                                                                                                                                              |
| 1,2,13                                                    | Roles and responsibilities | 5a     | Names, affiliations, and roles of protocol contributors                                                                                                                                                                                                                                  |
| 2                                                         |                            | 5b     | Name and contact information for the trial sponsor                                                                                                                                                                                                                                       |
| 13                                                        |                            | 5c     | Role of study sponsor and funders, if any, in study design; collection, management, analysis, and interpretation of data; writing of the report; and the decision to submit the report for publication, including whether they will have ultimate authority over any of these activities |
| 11                                                        |                            | 5d     | Composition, roles, and responsibilities of the coordinating centre, steering committee, endpoint adjudication committee, data management team, and other individuals or groups overseeing the trial, if applicable (see Item 21a for data monitoring committee)                         |
| <b>Introduction</b>                                       |                            |        |                                                                                                                                                                                                                                                                                          |
| 5-7                                                       | Background and rationale   | 6a     | Description of research question and justification for undertaking the trial, including summary of relevant studies (published and unpublished) examining benefits and harms for each intervention                                                                                       |
| 5-7                                                       |                            | 6b     | Explanation for choice of comparators                                                                                                                                                                                                                                                    |
| 7                                                         | Objectives                 | 7      | Specific objectives or hypotheses                                                                                                                                                                                                                                                        |
| 7-11                                                      | Trial design               | 8      | Description of trial design including type of trial (eg, parallel group, crossover, factorial, single group), allocation ratio, and framework (eg, superiority, equivalence, noninferiority, exploratory)                                                                                |
| <b>Methods: Participants, interventions, and outcomes</b> |                            |        |                                                                                                                                                                                                                                                                                          |
| 7                                                         | Study setting              | 9      | Description of study settings (eg, community clinic, academic hospital) and list of countries where data will be collected. Reference to where list of study sites can be obtained                                                                                                       |

|    |           |                                  |     |                                                                                                                                                                                                                                                                                                                                                                                |
|----|-----------|----------------------------------|-----|--------------------------------------------------------------------------------------------------------------------------------------------------------------------------------------------------------------------------------------------------------------------------------------------------------------------------------------------------------------------------------|
| 1  | 8-9       | Eligibility criteria             | 10  | Inclusion and exclusion criteria for participants. If applicable, eligibility criteria for study centres and individuals who will perform the interventions (eg, surgeons, psychotherapists)                                                                                                                                                                                   |
| 2  |           |                                  |     |                                                                                                                                                                                                                                                                                                                                                                                |
| 3  |           |                                  |     |                                                                                                                                                                                                                                                                                                                                                                                |
| 4  | 7-8       | Interventions                    | 11a | Interventions for each group with sufficient detail to allow replication, including how and when they will be administered                                                                                                                                                                                                                                                     |
| 5  |           |                                  |     |                                                                                                                                                                                                                                                                                                                                                                                |
| 6  |           |                                  |     |                                                                                                                                                                                                                                                                                                                                                                                |
| 7  |           |                                  |     |                                                                                                                                                                                                                                                                                                                                                                                |
| 8  | 11        |                                  | 11b | Criteria for discontinuing or modifying allocated interventions for a given trial participant (eg, drug dose change in response to harms, participant request, or improving/worsening disease)                                                                                                                                                                                 |
| 9  |           |                                  |     |                                                                                                                                                                                                                                                                                                                                                                                |
| 10 |           |                                  |     |                                                                                                                                                                                                                                                                                                                                                                                |
| 11 |           |                                  |     |                                                                                                                                                                                                                                                                                                                                                                                |
| 12 | 10        |                                  | 11c | Strategies to improve adherence to intervention protocols, and any procedures for monitoring adherence (eg, drug tablet return, laboratory tests)                                                                                                                                                                                                                              |
| 13 |           |                                  |     |                                                                                                                                                                                                                                                                                                                                                                                |
| 14 |           |                                  |     |                                                                                                                                                                                                                                                                                                                                                                                |
| 15 |           |                                  |     |                                                                                                                                                                                                                                                                                                                                                                                |
| 16 | 9         |                                  | 11d | Relevant concomitant care and interventions that are permitted or prohibited during the trial                                                                                                                                                                                                                                                                                  |
| 17 |           |                                  |     |                                                                                                                                                                                                                                                                                                                                                                                |
| 18 |           |                                  |     |                                                                                                                                                                                                                                                                                                                                                                                |
| 19 | 8, Table  | Outcomes                         | 12  | Primary, secondary, and other outcomes, including the specific measurement variable (eg, systolic blood pressure), analysis metric (eg, change from baseline, final value, time to event), method of aggregation (eg, median, proportion), and time point for each outcome. Explanation of the clinical relevance of chosen efficacy and harm outcomes is strongly recommended |
| 20 |           |                                  |     |                                                                                                                                                                                                                                                                                                                                                                                |
| 21 | 1         |                                  |     |                                                                                                                                                                                                                                                                                                                                                                                |
| 22 |           |                                  |     |                                                                                                                                                                                                                                                                                                                                                                                |
| 23 |           |                                  |     |                                                                                                                                                                                                                                                                                                                                                                                |
| 24 |           |                                  |     |                                                                                                                                                                                                                                                                                                                                                                                |
| 25 |           |                                  |     |                                                                                                                                                                                                                                                                                                                                                                                |
| 26 | Fig 1 and | Participant timeline             | 13  | Time schedule of enrolment, interventions (including any run-ins and washouts), assessments, and visits for participants. A schematic diagram is highly recommended (see Figure)                                                                                                                                                                                               |
| 27 |           |                                  |     |                                                                                                                                                                                                                                                                                                                                                                                |
| 28 | 2         |                                  |     |                                                                                                                                                                                                                                                                                                                                                                                |
| 29 |           |                                  |     |                                                                                                                                                                                                                                                                                                                                                                                |
| 30 |           |                                  |     |                                                                                                                                                                                                                                                                                                                                                                                |
| 31 | 8         | Sample size                      | 14  | Estimated number of participants needed to achieve study objectives and how it was determined, including clinical and statistical assumptions supporting any sample size calculations                                                                                                                                                                                          |
| 32 |           |                                  |     |                                                                                                                                                                                                                                                                                                                                                                                |
| 33 |           |                                  |     |                                                                                                                                                                                                                                                                                                                                                                                |
| 34 |           |                                  |     |                                                                                                                                                                                                                                                                                                                                                                                |
| 35 | 9-10      | Recruitment                      | 15  | Strategies for achieving adequate participant enrolment to reach target sample size                                                                                                                                                                                                                                                                                            |
| 36 |           |                                  |     |                                                                                                                                                                                                                                                                                                                                                                                |
| 37 |           |                                  |     |                                                                                                                                                                                                                                                                                                                                                                                |
| 38 |           |                                  |     |                                                                                                                                                                                                                                                                                                                                                                                |
| 39 |           |                                  |     |                                                                                                                                                                                                                                                                                                                                                                                |
| 40 |           |                                  |     |                                                                                                                                                                                                                                                                                                                                                                                |
| 41 |           |                                  |     |                                                                                                                                                                                                                                                                                                                                                                                |
| 42 |           |                                  |     |                                                                                                                                                                                                                                                                                                                                                                                |
| 43 | 10        | Sequence generation              | 16a | Method of generating the allocation sequence (eg, computer-generated random numbers), and list of any factors for stratification. To reduce predictability of a random sequence, details of any planned restriction (eg, blocking) should be provided in a separate document that is unavailable to those who enrol participants or assign interventions                       |
| 44 |           |                                  |     |                                                                                                                                                                                                                                                                                                                                                                                |
| 45 |           |                                  |     |                                                                                                                                                                                                                                                                                                                                                                                |
| 46 |           |                                  |     |                                                                                                                                                                                                                                                                                                                                                                                |
| 47 |           |                                  |     |                                                                                                                                                                                                                                                                                                                                                                                |
| 48 |           |                                  |     |                                                                                                                                                                                                                                                                                                                                                                                |
| 49 |           |                                  |     |                                                                                                                                                                                                                                                                                                                                                                                |
| 50 | 10        | Allocation concealment mechanism | 16b | Mechanism of implementing the allocation sequence (eg, central telephone; sequentially numbered, opaque, sealed envelopes), describing any steps to conceal the sequence until interventions are assigned                                                                                                                                                                      |
| 51 |           |                                  |     |                                                                                                                                                                                                                                                                                                                                                                                |
| 52 |           |                                  |     |                                                                                                                                                                                                                                                                                                                                                                                |
| 53 |           |                                  |     |                                                                                                                                                                                                                                                                                                                                                                                |
| 54 | 10        | Implementation                   | 16c | Who will generate the allocation sequence, who will enrol participants, and who will assign participants to interventions                                                                                                                                                                                                                                                      |
| 55 |           |                                  |     |                                                                                                                                                                                                                                                                                                                                                                                |
| 56 |           |                                  |     |                                                                                                                                                                                                                                                                                                                                                                                |
| 57 |           |                                  |     |                                                                                                                                                                                                                                                                                                                                                                                |
| 58 | 10        | Blinding (masking)               | 17a | Who will be blinded after assignment to interventions (eg, trial participants, care providers, outcome assessors, data analysts), and how                                                                                                                                                                                                                                      |
| 59 |           |                                  |     |                                                                                                                                                                                                                                                                                                                                                                                |
| 60 |           |                                  |     |                                                                                                                                                                                                                                                                                                                                                                                |
|    | 10        |                                  | 17b | If blinded, circumstances under which unblinding is permissible, and procedure for revealing a participant's allocated intervention during the trial                                                                                                                                                                                                                           |

#### Methods: Assignment of interventions (for controlled trials)

##### Allocation:

**Methods: Data collection, management, and analysis**

|    |    |                         |     |                                                                                                                                                                                                                                                                                                                                                                                                              |
|----|----|-------------------------|-----|--------------------------------------------------------------------------------------------------------------------------------------------------------------------------------------------------------------------------------------------------------------------------------------------------------------------------------------------------------------------------------------------------------------|
| 1  |    |                         |     |                                                                                                                                                                                                                                                                                                                                                                                                              |
| 2  | 12 | Data collection methods | 18a | Plans for assessment and collection of outcome, baseline, and other trial data, including any related processes to promote data quality (eg, duplicate measurements, training of assessors) and a description of study instruments (eg, questionnaires, laboratory tests) along with their reliability and validity, if known. Reference to where data collection forms can be found, if not in the protocol |
| 3  |    |                         |     |                                                                                                                                                                                                                                                                                                                                                                                                              |
| 4  |    |                         |     |                                                                                                                                                                                                                                                                                                                                                                                                              |
| 5  |    |                         |     |                                                                                                                                                                                                                                                                                                                                                                                                              |
| 6  |    |                         |     |                                                                                                                                                                                                                                                                                                                                                                                                              |
| 7  |    |                         |     |                                                                                                                                                                                                                                                                                                                                                                                                              |
| 8  |    |                         |     |                                                                                                                                                                                                                                                                                                                                                                                                              |
| 9  |    |                         |     |                                                                                                                                                                                                                                                                                                                                                                                                              |
| 10 |    |                         |     |                                                                                                                                                                                                                                                                                                                                                                                                              |
| 11 | 10 |                         | 18b | Plans to promote participant retention and complete follow-up, including list of any outcome data to be collected for participants who discontinue or deviate from intervention protocols                                                                                                                                                                                                                    |
| 12 |    |                         |     |                                                                                                                                                                                                                                                                                                                                                                                                              |
| 13 |    |                         |     |                                                                                                                                                                                                                                                                                                                                                                                                              |
| 14 |    |                         |     |                                                                                                                                                                                                                                                                                                                                                                                                              |
| 15 | 12 | Data management         | 19  | Plans for data entry, coding, security, and storage, including any related processes to promote data quality (eg, double data entry; range checks for data values). Reference to where details of data management procedures can be found, if not in the protocol                                                                                                                                            |
| 16 |    |                         |     |                                                                                                                                                                                                                                                                                                                                                                                                              |
| 17 |    |                         |     |                                                                                                                                                                                                                                                                                                                                                                                                              |
| 18 |    |                         |     |                                                                                                                                                                                                                                                                                                                                                                                                              |
| 19 |    |                         |     |                                                                                                                                                                                                                                                                                                                                                                                                              |
| 20 |    |                         |     |                                                                                                                                                                                                                                                                                                                                                                                                              |
| 21 | 11 | Statistical methods     | 20a | Statistical methods for analysing primary and secondary outcomes. Reference to where other details of the statistical analysis plan can be found, if not in the protocol                                                                                                                                                                                                                                     |
| 22 |    |                         |     |                                                                                                                                                                                                                                                                                                                                                                                                              |
| 23 |    |                         |     |                                                                                                                                                                                                                                                                                                                                                                                                              |
| 24 |    |                         |     |                                                                                                                                                                                                                                                                                                                                                                                                              |
| 25 |    |                         |     |                                                                                                                                                                                                                                                                                                                                                                                                              |
| 26 | 11 |                         | 20b | Methods for any additional analyses (eg, subgroup and adjusted analyses)                                                                                                                                                                                                                                                                                                                                     |
| 27 |    |                         |     |                                                                                                                                                                                                                                                                                                                                                                                                              |
| 28 | 11 |                         | 20c | Definition of analysis population relating to protocol non-adherence (eg, as randomised analysis), and any statistical methods to handle missing data (eg, multiple imputation)                                                                                                                                                                                                                              |
| 29 |    |                         |     |                                                                                                                                                                                                                                                                                                                                                                                                              |
| 30 |    |                         |     |                                                                                                                                                                                                                                                                                                                                                                                                              |
| 31 |    |                         |     |                                                                                                                                                                                                                                                                                                                                                                                                              |

**Methods: Monitoring**

|    |    |                          |     |                                                                                                                                                                                                                                                                                                                                       |
|----|----|--------------------------|-----|---------------------------------------------------------------------------------------------------------------------------------------------------------------------------------------------------------------------------------------------------------------------------------------------------------------------------------------|
| 32 |    |                          |     |                                                                                                                                                                                                                                                                                                                                       |
| 33 |    |                          |     |                                                                                                                                                                                                                                                                                                                                       |
| 34 | 11 | Data monitoring          | 21a | Composition of data monitoring committee (DMC); summary of its role and reporting structure; statement of whether it is independent from the sponsor and competing interests; and reference to where further details about its charter can be found, if not in the protocol. Alternatively, an explanation of why a DMC is not needed |
| 35 |    |                          |     |                                                                                                                                                                                                                                                                                                                                       |
| 36 |    |                          |     |                                                                                                                                                                                                                                                                                                                                       |
| 37 |    |                          |     |                                                                                                                                                                                                                                                                                                                                       |
| 38 |    |                          |     |                                                                                                                                                                                                                                                                                                                                       |
| 39 |    |                          |     |                                                                                                                                                                                                                                                                                                                                       |
| 40 |    |                          |     |                                                                                                                                                                                                                                                                                                                                       |
| 41 | 11 |                          | 21b | Description of any interim analyses and stopping guidelines, including who will have access to these interim results and make the final decision to terminate the trial                                                                                                                                                               |
| 42 |    |                          |     |                                                                                                                                                                                                                                                                                                                                       |
| 43 |    |                          |     |                                                                                                                                                                                                                                                                                                                                       |
| 44 |    |                          |     |                                                                                                                                                                                                                                                                                                                                       |
| 45 |    |                          |     |                                                                                                                                                                                                                                                                                                                                       |
| 46 | 11 | Harms                    | 22  | Plans for collecting, assessing, reporting, and managing solicited and spontaneously reported adverse events and other unintended effects of trial interventions or trial conduct                                                                                                                                                     |
| 47 |    |                          |     |                                                                                                                                                                                                                                                                                                                                       |
| 48 |    |                          |     |                                                                                                                                                                                                                                                                                                                                       |
| 49 |    |                          |     |                                                                                                                                                                                                                                                                                                                                       |
| 50 |    |                          |     |                                                                                                                                                                                                                                                                                                                                       |
| 51 | 11 | Auditing                 | 23  | Frequency and procedures for auditing trial conduct, if any, and whether the process will be independent from investigators and the sponsor                                                                                                                                                                                           |
| 52 |    |                          |     |                                                                                                                                                                                                                                                                                                                                       |
| 53 |    |                          |     |                                                                                                                                                                                                                                                                                                                                       |
| 54 |    |                          |     |                                                                                                                                                                                                                                                                                                                                       |
| 55 |    |                          |     |                                                                                                                                                                                                                                                                                                                                       |
| 56 | 12 | Research ethics approval | 24  | Plans for seeking research ethics committee/institutional review board (REC/IRB) approval                                                                                                                                                                                                                                             |
| 57 |    |                          |     |                                                                                                                                                                                                                                                                                                                                       |
| 58 |    |                          |     |                                                                                                                                                                                                                                                                                                                                       |
| 59 | 11 | Protocol amendments      | 25  | Plans for communicating important protocol modifications (eg, changes to eligibility criteria, outcomes, analyses) to relevant parties (eg, investigators, REC/IRBs, trial participants, trial registries, journals, regulators)                                                                                                      |
| 60 |    |                          |     |                                                                                                                                                                                                                                                                                                                                       |

|    |           |                               |     |                                                                                                                                                                                                                                                                                     |
|----|-----------|-------------------------------|-----|-------------------------------------------------------------------------------------------------------------------------------------------------------------------------------------------------------------------------------------------------------------------------------------|
| 1  | 10        | Consent or assent             | 26a | Who will obtain informed consent or assent from potential trial participants or authorised surrogates, and how (see Item 32)                                                                                                                                                        |
| 2  |           |                               |     |                                                                                                                                                                                                                                                                                     |
| 3  | N/A       |                               | 26b | Additional consent provisions for collection and use of participant data and biological specimens in ancillary studies, if applicable                                                                                                                                               |
| 4  |           |                               |     |                                                                                                                                                                                                                                                                                     |
| 5  |           |                               |     |                                                                                                                                                                                                                                                                                     |
| 6  | 12        | Confidentiality               | 27  | How personal information about potential and enrolled participants will be collected, shared, and maintained in order to protect confidentiality before, during, and after the trial                                                                                                |
| 7  |           |                               |     |                                                                                                                                                                                                                                                                                     |
| 8  |           |                               |     |                                                                                                                                                                                                                                                                                     |
| 9  |           |                               |     |                                                                                                                                                                                                                                                                                     |
| 10 |           |                               |     |                                                                                                                                                                                                                                                                                     |
| 11 | 13        | Declaration of interests      | 28  | Financial and other competing interests for principal investigators for the overall trial and each study site                                                                                                                                                                       |
| 12 |           |                               |     |                                                                                                                                                                                                                                                                                     |
| 13 |           |                               |     |                                                                                                                                                                                                                                                                                     |
| 14 | 12        | Access to data                | 29  | Statement of who will have access to the final trial dataset, and disclosure of contractual agreements that limit such access for investigators                                                                                                                                     |
| 15 |           |                               |     |                                                                                                                                                                                                                                                                                     |
| 16 |           |                               |     |                                                                                                                                                                                                                                                                                     |
| 17 |           |                               |     |                                                                                                                                                                                                                                                                                     |
| 18 | 11        | Ancillary and post-trial care | 30  | Provisions, if any, for ancillary and post-trial care, and for compensation to those who suffer harm from trial participation                                                                                                                                                       |
| 19 |           |                               |     |                                                                                                                                                                                                                                                                                     |
| 20 |           |                               |     |                                                                                                                                                                                                                                                                                     |
| 21 | 12        | Dissemination policy          | 31a | Plans for investigators and sponsor to communicate trial results to participants, healthcare professionals, the public, and other relevant groups (eg, via publication, reporting in results databases, or other data sharing arrangements), including any publication restrictions |
| 22 |           |                               |     |                                                                                                                                                                                                                                                                                     |
| 23 |           |                               |     |                                                                                                                                                                                                                                                                                     |
| 24 |           |                               |     |                                                                                                                                                                                                                                                                                     |
| 25 |           |                               |     |                                                                                                                                                                                                                                                                                     |
| 26 |           |                               |     |                                                                                                                                                                                                                                                                                     |
| 27 | 12        |                               | 31b | Authorship eligibility guidelines and any intended use of professional writers                                                                                                                                                                                                      |
| 28 |           |                               |     |                                                                                                                                                                                                                                                                                     |
| 29 | 12        |                               | 31c | Plans, if any, for granting public access to the full protocol, participant-level dataset, and statistical code                                                                                                                                                                     |
| 30 |           |                               |     |                                                                                                                                                                                                                                                                                     |
| 31 |           |                               |     |                                                                                                                                                                                                                                                                                     |
| 32 |           |                               |     |                                                                                                                                                                                                                                                                                     |
| 33 |           | <b>Appendices</b>             |     |                                                                                                                                                                                                                                                                                     |
| 34 | Available | Informed consent materials    | 32  | Model consent form and other related documentation given to participants and authorised surrogates                                                                                                                                                                                  |
| 35 | on        |                               |     |                                                                                                                                                                                                                                                                                     |
| 36 | request   |                               |     |                                                                                                                                                                                                                                                                                     |
| 37 |           |                               |     |                                                                                                                                                                                                                                                                                     |
| 38 |           |                               |     |                                                                                                                                                                                                                                                                                     |
| 39 | 12        | Biological specimens          | 33  | Plans for collection, laboratory evaluation, and storage of biological specimens for genetic or molecular analysis in the current trial and for future use in ancillary studies, if applicable                                                                                      |
| 40 |           |                               |     |                                                                                                                                                                                                                                                                                     |
| 41 |           |                               |     |                                                                                                                                                                                                                                                                                     |
| 42 |           |                               |     |                                                                                                                                                                                                                                                                                     |

\*It is strongly recommended that this checklist be read in conjunction with the SPIRIT 2013 Explanation & Elaboration for important clarification on the items. Amendments to the protocol should be tracked and dated. The SPIRIT checklist is copyrighted by the SPIRIT Group under the Creative Commons "[Attribution-NonCommercial-NoDerivs 3.0 Unported](https://creativecommons.org/licenses/by-nc-nd/3.0/)" license.

43  
44  
45  
46  
47  
48  
49  
50  
51  
52  
53  
54  
55  
56  
57  
58  
59  
60



# BMJ Open

## A pilot double-blind randomised placebo-controlled dose-response trial assessing the effects of melatonin on infertility treatment (MIART): study protocol

|                                 |                                                                                                                                                                                                                                                                                                                                                                                                                                                                                                 |
|---------------------------------|-------------------------------------------------------------------------------------------------------------------------------------------------------------------------------------------------------------------------------------------------------------------------------------------------------------------------------------------------------------------------------------------------------------------------------------------------------------------------------------------------|
| Journal:                        | <i>BMJ Open</i>                                                                                                                                                                                                                                                                                                                                                                                                                                                                                 |
| Manuscript ID:                  | bmjopen-2014-005986.R1                                                                                                                                                                                                                                                                                                                                                                                                                                                                          |
| Article Type:                   | Protocol                                                                                                                                                                                                                                                                                                                                                                                                                                                                                        |
| Date Submitted by the Author:   | 29-Jul-2014                                                                                                                                                                                                                                                                                                                                                                                                                                                                                     |
| Complete List of Authors:       | Fernando, Shavi; Monash University, Department of Obstetrics and Gynaecology<br>Osianlis, Tiki; Monash University, Department of Obstetrics and Gynaecology<br>Vollenhoven, Beverley; Monash University, Department of Obstetrics and Gynaecology<br>Wallace, Euan; Monash University, Department of Obstetrics and Gynaecology; MIMR-PHI, Institute of Medical Research<br>Rombauts, Luk; Monash University, Department of Obstetrics and Gynaecology; MIMR-PHI, Institute of Medical Research |
| <b>Primary Subject Heading</b>: | Obstetrics and gynaecology                                                                                                                                                                                                                                                                                                                                                                                                                                                                      |
| Secondary Subject Heading:      | Reproductive medicine                                                                                                                                                                                                                                                                                                                                                                                                                                                                           |
| Keywords:                       | Reproductive medicine < GYNAECOLOGY, Subfertility < GYNAECOLOGY, Sex steroids & HRT < DIABETES & ENDOCRINOLOGY                                                                                                                                                                                                                                                                                                                                                                                  |
|                                 |                                                                                                                                                                                                                                                                                                                                                                                                                                                                                                 |

SCHOLARONE™  
Manuscripts

1  
2  
3  
4 **A pilot double-blind randomised placebo-controlled dose-response trial assessing**  
5 **the effects of melatonin on infertility treatment (MIART): study protocol**  
6  
7  
8  
9

10 **Corresponding Author:**

11 Dr Shavi Fernando

12 shavif@hotmail.com  
13  
14  
15  
16  
17  
18

19 **Authors:**

20 **Dr Shavi Fernando**

21 MBBS(hon) BMedSc(hon)

22 MIMR-PHI Institute of Medical Research 246 Clayton rd, Clayton Victoria Australia 3168

23 Department of Obstetrics and Gynaecology, Monash University, Clayton, Victoria Australia

24 Level 5, Monash Medical Centre, Clayton rd, Clayton, Victoria Australia 3168  
25  
26  
27  
28  
29  
30  
31  
32

33 **Dr Tiki Osianlis**

34 BSc(hon) PhD

35 Department of Obstetrics and Gynaecology, Monash University, Clayton, Victoria Australia

36 Monash IVF, 252 Clayton Rd, Clayton, Victoria Australia 3168  
37  
38  
39  
40  
41  
42  
43  
44

45 **A/Prof Beverley Vollenhoven**

46 MD PhD FRANZCOG CREI

47 Department of Obstetrics and Gynaecology, Monash University, Clayton Australia

48 Level 5, Monash Medical Centre, Clayton rd, Clayton, Victoria Australia 3168  
49  
50  
51  
52  
53  
54

55 **Prof Euan Wallace**

56 MBChB MD FRCOG FRANZCOG  
57  
58  
59  
60

1 MIMR-PHI Institute of Medical Research 246 Clayton rd, Clayton Victoria Australia 3168

2  
3 Department of Obstetrics and Gynaecology, Monash University, Clayton, Australia

4  
5 Level 5, Monash Medical Centre, Clayton rd, Clayton, Victoria Australia 3168

6  
7  
8  
9 **A/Prof Luk Rombauts**

10 MD PhD FRANZCOG CREI

11  
12 MIMR-PHI Institute of Medical Research 246 Clayton rd, Clayton Victoria Australia 3168

13  
14 Department of Obstetrics and Gynaecology, Monash University, Clayton, Victoria Australia

15  
16 Monash IVF, 252 Clayton Rd, Clayton, Victoria Australia 3168

17  
18  
19  
20  
21  
22 **Trial Sponsor:**

23  
24 The Ritchie Centre, Monash Medical Centre, Clayton rd, Clayton VIC AUS 3168

25  
26 03 95946666

27  
28  
29  
30 **Running Title:** Melatonin in ART - MIART randomised trial: study protocol

31  
32  
33  
34 **Keywords:**

35  
36 Melatonin, assisted reproductive technology (ART), in-vitro fertilization, oxidative stress, protocol

37  
38  
39  
40 **Word Count:** 2796

## Abstract

### Introduction

High levels of oxidative stress can have considerable impact on the outcomes of in-vitro fertilization (IVF). Recent studies have reported that melatonin, a neurohormone secreted from the pineal gland in response to darkness, has significant anti-oxidative capabilities which may protect against the oxidative stress of infertility treatment on gametes and embryos. Early studies of oral melatonin (3-4mg/day) in IVF have suggested favourable outcomes. However, most trials were poorly designed and none have addressed the optimum dose of melatonin. We present a proposal for a pilot double-blind randomised placebo-controlled dose-response trial aimed to determine whether oral melatonin supplementation during ovarian stimulation can improve the outcomes of assisted reproductive technology.

### Methods and analyses

We will recruit 160 infertile women into one of four groups: placebo (n=40); melatonin 2mg twice per day (n=40); melatonin 4mg twice per day (n=40) and melatonin 8mg twice per day (n=40). The primary outcome will be clinical pregnancy rate. Secondary clinical outcomes include oocyte number/quality, embryo number/quality and fertilization rate. We will also measure serum melatonin and the oxidative stress marker, 8-hydroxy- 2'-deoxyguanosine (8-OHdg) at baseline and after treatment and levels of these in follicular fluid at egg pick-up. We will investigate follicular blood flow with Doppler ultrasound, patient sleepiness scores, and pregnancy complications, comparing outcomes between groups. This protocol has been designed in accordance with the SPIRIT 2013 Guidelines.

### Ethics and dissemination:

Ethical approval has been obtained from Monash Health HREC (Ref: 13402B), Monash University HREC (Ref: CF14/523 – 2014000181) and Monash Surgical Private Hospital HREC (Ref: 14107). Data analysis, interpretation and conclusions will be presented at national and international conferences and published in peer-reviewed journals.

**Registration Details:** Version 1. Australian New Zealand Clinical Trials Registry, ACTRN: ACTRN12613001317785. The complete WHO Registration Data Set, as described by the SPIRIT 2013 guidelines is available for viewing at <https://www.anzctr.org.au/Trial/Registration/TrialReview.aspx?id=365376>

## Strengths and limitations

- This trial is a well-designed pilot study to achieve biochemically and clinically relevant outcomes.
- Significant preliminary research has been performed in order to appropriately design the study to fill gaps in current knowledge.
- This is the first placebo controlled dose-finding trial of melatonin in the field of infertility world-wide and if successful, has the potential to provide a foundation for future large randomised controlled trials.
- Because of constraints of such a pilot study in the infertile population, relatively small numbers of participants are anticipated. To help minimise the effect of this, a cross-over arm will be introduced. It is expected that this limitation will be overcome in future trials that will be designed based on this study.

## Introduction

Humans are aerobic organisms and when oxygen is utilised in metabolic processes, free oxygen radicals are created as a consequence. These radicals are oxidants and contain 'free' valence electrons, making them highly unstable and therefore reactive, capable of causing injury to cells. This occurs by accepting electrons from another molecule (a reductant) in order to reach stability. In doing so, the chemical structure of the reductant is changed, and may no longer be able to perform its designated function. In fact, often the reductant can then produce or sometimes even become an oxidant having the potential to cause oxidative stress in its own right.<sup>1</sup> Anti-oxidative agents are present endogenously and can also be administered exogenously. They are designed to reduce free radicals by donating electrons to stabilise the free radical.<sup>2</sup> The term 'reactive oxygen species' (ROS), not only includes free radicals but also molecularly stable non-radical molecules which contain oxygen and are capable of causing oxidative stress, such as hydrogen peroxide (H<sub>2</sub>O<sub>2</sub>).<sup>3</sup> While ROS are necessary for essential physiological processes, an overabundance can result in cellular and tissue damage and this is commonly referred to as 'oxidative stress'.<sup>4</sup> Oxidative stress can be measured in bodily fluids by markers including 8-hydroxy- 2'-deoxyguanosine (8-Ohdg).<sup>5</sup>

Over recent years, the potential role of oxidative stress in the outcomes of assisted reproductive technology (ART) has been gaining increasing attention, in particular with regards to in-vitro fertilization (IVF) and intracytoplasmic sperm injection (ICSI). This is perhaps not surprising given that ART exposes both oocytes and embryos to high levels of superoxide free radicals during gamete and embryo culture<sup>6</sup>. Indeed, in addition to the culture conditions, *in vitro* the oocytes are not afforded the normal protection of the antioxidant-rich follicular fluid or surrounding cumulus cells, leaving them more susceptible to oxidative damage.<sup>7,8</sup> Reproductive processes such as chromosome segregation (resulting in euploid oocytes), polar body extrusion (necessary for haploid oocytes), fertilization and early cleavage (to avoid arrested embryos) require energy. As the average age of women seeking fertility treatment rises, the level of ROS and subsequent oxidative stress increases, resulting in mitochondrial DNA mutations which in turn affect ATP production in the oocyte. Without the necessary ATP, required cellular processes cannot occur correctly, having a direct effect on the quality of the oocyte, embryo and the final outcome of the IVF procedure.<sup>9,10</sup>

It has been shown that oocyte quality begins to deteriorate immediately following ovulation. This has been thought to be an inflammatory driven oxidative stress process<sup>11</sup> whereby the production of cytokines and proteases is associated with an increase in ROS which in turn impair oocyte maturation.<sup>12-14</sup> Evidence of oxidative damage in *in vitro* oocytes has been shown to exist as early as 8 hours after ovulation.<sup>15</sup> Nor surprisingly it has been shown that high levels of the oxidative stress in the follicular fluid of infertile women are associated with poor oocyte maturation and embryo quality, and that inducers of oxidative stress can be used to inhibit oocyte maturation.<sup>5,12</sup>

1  
2 Together, these observations highlighting the importance of oxidative stress in the developing  
3 follicle and in the future success of fertilization, whether *in vivo* or *in vitro*.  
4

5 Recently, it has been shown that melatonin, a neurohormone secreted from the pineal gland, has  
6 important oxygen-scavenging properties which naturally mitigate oxidative stress by both  
7 neutralising ROS in human tissues and by inducing endogenous anti-oxidant enzymes.<sup>16-18</sup>

8 Melatonin has been shown to be beneficial as an adjuvant therapy in the management of many  
9 medical conditions in which oxidative stress has been implicated including diabetes, glaucoma,  
10 irritable bowel syndrome and fertility.<sup>19-22</sup>  
11

12 The effects of melatonin supplementation on culture media,<sup>12, 21, 23-27</sup> gametes,<sup>5, 15, 28</sup> embryos<sup>15,</sup>  
13 <sup>29, 30</sup> and luteal function<sup>31-35</sup> have been identified as useful areas for investigation. Human clinical  
14 studies have begun recently, with emphasis on oral supplementation of melatonin during the  
15 stimulation cycle and its effects on oocyte and embryo quality.<sup>12, 36-39</sup>  
16

17 Importantly, melatonin has a remarkably benign safety profile in both animal and human studies.  
18 A mouse study investigating dose-related effects of melatonin on ovarian grafts found that doses  
19 at 200mg/kg/day have immunosuppressant effects, leading to prolongation of graft survival,  
20 however, also resulted in a reduction in healthy follicles. They concluded that doses of greater  
21 than 20mg/kg/day resulted in a reduction in both healthy follicles and ovarian size.<sup>40</sup> The maternal  
22 lowest observed adverse effect level (LOAEL), the lowest level at which an adverse event was  
23 observed, appears to be around 200mg/kg/day, equivalent to over 1g per day for humans.  
24 Furthermore, in rodent studies, no significant adverse effects on either the embryo or fetus have  
25 been reported for up to doses of 200mg/kg/day.<sup>41</sup> There have been several randomised controlled  
26 trials addressing high doses of melatonin in human adults and children,<sup>42-46</sup> and reports have  
27 established that toxicity levels in humans are not reached until a daily dose of at least 5mg/kg.<sup>47</sup>  
28  
29  
30  
31  
32  
33  
34  
35  
36  
37

### 38 Rationale

39 In the USA in 2011, only 1 in 4 of all IVF cycles resulted in clinical pregnancy with less than 1 in 5  
40 cycles resulting in live birth<sup>48</sup>. That is 4 out of 5 IVF cycles do not result in a live baby. Clearly there  
41 is much room for further improvement, if only to meet societal expectations and reduce  
42 healthcare costs. Continued research into novel adjuvant therapies designed to improve IVF  
43 outcomes is therefore merited. Several human and animal studies support the use of melatonin in  
44 the treatment of infertility, with beneficial actions being largely attributed to its anti-oxidant  
45 properties. Furthermore, melatonin receptors are found on granulosa cells, oocytes and  
46 embryos,<sup>49</sup> with intrafollicular melatonin concentrations being significantly higher than those  
47 found in serum, again suggesting a physiological role in reproduction.<sup>39, 67, 68</sup> The human studies  
48 addressing the use of melatonin in infertility treatment undertaken to date have been small and  
49 not placebo-controlled. None have attempted to identify an optimal dose.<sup>36-38, 50</sup> Further,  
50 interpretation of any outcomes have been hampered by the within-patient comparison design,  
51 where patients act as their own controls.<sup>12, 39, 51</sup>  
52  
53  
54  
55  
56  
57  
58  
59  
60

1 We have designed this study to be the first placebo-controlled, dose-finding clinical trial to  
2 investigate the effect(s), if any, of oral melatonin on the clinical pregnancy rate following IVF/ICSI  
3 treatment.  
4  
5  
6  
7

### 8 **Aims**

9  
10 The overall aim of this trial is to determine whether oral melatonin administration can improve the  
11 outcomes of IVF/ICSI. In order to address this, we will determine whether melatonin  
12 administration has a dose-response effect in women undergoing IVF/ICSI on:  
13  
14

- 15 1. biochemical markers of follicle and oocyte health (melatonin, 8-hydroxy- 2'-  
16 deoxyguanosine (8-OHdg), progesterone, oestradiol)
  - 17 2. sonographic markers of follicle health
  - 18 3. patient sleepiness
  - 19 4. pregnancy rate following IVF/ICSI
- 20  
21  
22  
23  
24  
25  
26  
27

### 28 **Methods and analyses**

29  
30 This protocol has been designed in accordance with the SPIRIT 2013 Guidelines.<sup>52</sup> Recruitment will  
31 commence in July 2014. This will occur over two years. Analysis and dissemination will occur after  
32 this period of time. The study is expected to be completed by February 2017.  
33  
34  
35  
36

### 37 **Study design**

38  
39 Pilot phase II cross-over double-blinded randomised placebo-controlled dose-response trial  
40  
41  
42

### 43 **Subjects**

44 We plan to recruit a total of 160 infertile women undergoing IVF/ICSI.  
45  
46  
47  
48  
49

### 50 **Study setting**

51  
52 Patients will be recruited from Monash IVF infertility clinics in Melbourne, Australia over a period  
53 of 2 years.  
54  
55  
56  
57



## Interventions to be measured

This trial will have four arms. All capsules will be indistinguishable from each other.

1. Placebo capsule taken twice per day
2. 2mg melatonin capsule twice per day (4mg/d total)
3. 4mg melatonin capsule twice per day (8mg/d total)
4. 8mg melatonin capsule twice per day (16mg/d total)

## Primary Outcome

Clinical pregnancy rate,<sup>53</sup> defined as the presence of a live pregnancy in the uterine cavity at a transvaginal ultrasound(TVUS) at 6-8 weeks' gestation.

## Secondary outcomes

See *Table 1* for details.

## Sample Size

As this is a pilot dose-finding study, without precedence on which to base accurate power calculations, a power calculation has not been performed. Part of our aim is to provide clarification allowing for larger randomised trials to be designed in the future. We hypothesise that melatonin will have a positive dose-response effect on clinical pregnancy rates after IVF/ICSI. We have chosen a convenience sample of 160 participants, 40 in each of the four groups, in order to assess plausible morphological, biochemical and sonographic surrogate markers for oocyte quality, as well as to provide an indication of the effect size for each dose for our primary outcome, clinical pregnancy rate. Conservatively estimating that, in total, 50% of patients (n=80) do not get pregnant after their first cycle, we may assume that 60 patients will participate in the crossover arm (allowing for drop-outs) in their second cycle and be allocated to a different treatment group.

## Inclusion criteria

1. Undergoing first cycle of IVF or ICSI
2. Age between 18 and 45

3. Body mass index (BMI) between 18 and 35
4. Undergoing a GnRH antagonist cycle (without OCP scheduling)

### Exclusion criteria

1. Current untreated pelvic pathology – moderate to severe endometriosis, submucosal uterine fibroids/polyps assessed by the treating specialist to affect fertility, pelvic inflammatory disease, uterine malformations, Asherman's syndrome and hydrosalpinx.
2. Currently enrolled in another interventional clinical trial
3. Concurrent use of other adjuvant therapies (eg. Chinese herbs, acupuncture)
4. Current pregnancy
5. Malignancy or other contraindication to IVF
6. Autoimmune disorders
7. Undergoing preimplantation genetic diagnosis (PGD)
8. Hypersensitivity to melatonin or its metabolites
9. Concurrent use of any of the following medications
  - a. Fluvoxamine (eg. Luvox, Movox, Voxam)
  - b. Cimetidine (eg. Magicul, Tagamet)
  - c. Quinolones and other CYP1A2 inhibitors (Ciprofloxacin, Avalox)
  - d. Carbamazepine (eg. Tegretol), rifampicin (eg. Rifadin) and other CYP1A2 inducers
  - e. Zolpidem (eg. Stilnox), zopiclone (eg. Imovane) and other non-benzodiazepine hypnotics
10. Inability to comply with trial protocol

### Concomitant care

Aside from trial protocol and inclusion/exclusion criteria listed above, standard concomitant care, such as folic acid supplements, is permitted.

## Participant enrolment

This trial will begin recruitment at the level of the infertility specialist. Once identified as requiring IVF/ICSI, and satisfying inclusion and exclusion criteria, the patient will be provided with detailed written information about the trial protocol. After approximately one week, the patient will be approached and written informed consent will be obtained by the principle investigator at the first visit with the infertility clinic nurse. Baseline blood tests will be taken and basic demographic information including aetiology of infertility will be recorded. The patient will then be randomised by the principle investigator (see below) to one of the study arms and provided with the trial medication. The participant will commence taking the trial medication on the day that ovarian stimulation injections begin (Day 2-3 of menses) at 0800 and 2200 each day, with the last capsule being taken at 2200 the night before oocyte collection.

For a summarised participant timeline, See *Figure 1* and *Figure 2*.

## Allocation concealment, blinding and randomisation

Each treatment arm will be randomly allocated a letter (A, B, C or D) by way of opaque sealed envelope. Randomisation will be computerised and patients will be randomised at a ratio of 1:1:1:1 to one of the groups, A-D, using the minimisation method, a method of randomisation accounting for factors known to affect the outcome used in small trials to prevent selection bias.<sup>54</sup>

With a crossover design improved patient recruitment is very likely because all non-pregnant participants will be guaranteed at least one cycle with one of the doses of melatonin.<sup>55, 56</sup> After completing the first study cycle, those participants that are not pregnant will be recruited for the cross-over cycle in which they will be assigned the next treatment arm. For example, if a participant were allocated to treatment group A in their first cycle and did not become pregnant, they would be offered allocation to group B in their second cycle and so on.

Participants will be blinded by receiving identical-appearing unmarked capsules. All trial researchers will be blinded to treatment allocation group until after analyses are performed at the completion of the trial. A Data Safety Monitoring Committee (see *Adverse events* for details) and dispensing pharmacy will be aware of allocation to allow identification of any unbalanced or multiple serious adverse events that may necessitate emergency unblinding of researchers and participants.

## Adherence and retention

In order to ensure the integrity of study data, participant adherence to trial protocol will be assessed on a medication administration record updated daily by the participant. At oocyte collection, participants will return medication bottles and compliance will be confirmed by

1 counting remaining tablets. This will be recorded on individual patient compliance forms and  
2 patient record forms. Every reasonable effort will be made from the time of enrolment until the  
3 end of follow-up to maintain contact with and maintain subject participation in the trial.  
4  
5  
6  
7

### 8 **Analysis plan**

9  
10 SPSS v22.0 (IBM, Armonk, New York) will be used for data analysis. Primary analysis will occur by  
11 the intention-to-treat principle. A secondary analysis will be performed for 'actual treatment  
12 received'. Statistical analyses will be performed using Chi-square tests for dichotomous categorical  
13 outcome variables. Clinical and demographic data will be analysed with parametric tests if they are  
14 normally distributed (ANOVA with Bonferroni adjustment), otherwise appropriate non-parametric  
15 tests will be implemented (Kruskal-Wallis for between group analyses). Within patient changes  
16 (paired data), for example when comparing serum levels of melatonin at baseline and after  
17 treatment, will be compared using repeated measures ANOVA or Wilcoxon signed rank test  
18 depending on normality of data.  $P < 0.05$  will be considered statistically significant. Where  
19 statistically sound, adjusted odds ratios will be calculated to account for confounders or effect  
20 modifiers. To account for missing data, two analyses will be run, with the first excluding missing  
21 values and the second by imputation of missing values to determine how conclusions are affected.  
22  
23  
24  
25  
26  
27  
28  
29

### 30 **Adverse events and data safety and monitoring**

31  
32 An independent Data Safety and Monitoring Committee (DSMC) has been established at Monash  
33 Health in order to monitor occurrences of adverse events. The principle investigator will be  
34 available by telephone at all times during the trial and participants will be provided with contact  
35 details in case of any adverse events. Participants will also be interviewed at the time of their  
36 ultrasound and the day of oocyte collection to ascertain the occurrence of any adverse events.  
37 Serious adverse events will be recorded separately and followed up until resolution. Such events  
38 will be reported to the Monash Health, Monash University, Monash Surgical Private Hospital and  
39 Epworth HealthCare Human Research Ethics Committees, the Monash Health DSMC, the Monash  
40 Health Therapeutics Committee and, if directed by HREC, to the Australian Therapeutics and  
41 Goods Administration.  
42  
43  
44  
45  
46  
47  
48

### 49 **Trial modification and discontinuation**

50  
51 In the absence of adverse events, the medication regimen will not be modified once commenced.  
52 If other protocol changes are deemed necessary by the investigating team, ethics approval will be  
53 sought from all approving Human Research Ethics Committees. Once approved, protocol  
54 amendments will be notified to all investigators, administrators (eg. dispensing pharmacy) and  
55 trial participants via telephone.  
56  
57  
58  
59  
60

1  
2 Patients are permitted to discontinue their inclusion in the trial at any point in time at their  
3 request or following an unexpected serious adverse event as described above. The DSMC will  
4 perform an interim analysis specifically assessing adverse events after 50% of participants have  
5 been recruited. Otherwise, the trial will cease follow-up once patients have given birth from a trial  
6 treatment cycle.  
7  
8  
9

### 10 11 **Data collection, informed consent forms and confidentiality**

12  
13 Data will be recorded in both hardcopy and electronic form. Hardcopies will be stored in a secured  
14 filing cabinet at the administering institution. Electronic copies will be stored in encrypted files on  
15 a password protected computer. All data will be kept for 15 years, following this time, hardcopies  
16 will be destroyed by shredding or burning and electronic copies will be deleted by formatting.  
17  
18 Organic samples will be stored until analysis in a secured locked temperature-controlled freezer at  
19 the Monash Institute of Medical Research that can only be accessed by authorized staff. Samples  
20 and participant records will not contain any directly identifiable information. No additional  
21 biological samples will be kept for use in ancillary studies.  
22  
23  
24

25 For access to data collection forms, including sleep diaries, medication compliance and informed  
26 consent forms please contact the principle investigator.  
27  
28  
29  
30

### 31 **Ethics and dissemination**

32  
33 Ethical approval has been obtained from Monash Health HREC (Ref:13402B), Monash University  
34 HREC (Ref: CF14/523 – 2014000181) and Monash Surgical Private Hospital HREC (Ref: 14107). Data  
35 analysis, interpretation and conclusions will be presented at national and international  
36 conferences and published in peer-reviewed journals. De-identified summary results will also be  
37 made publically available on the Monash IVF website.  
38  
39  
40  
41  
42

### 43 **Discussion**

44  
45 The MIART trial has the potential to improve IVF treatment protocols, with both immediate and  
46 translational benefit to patients. If melatonin is found to improve outcomes after IVF/ICSI, it may  
47 become a routine part of management of the infertile couple. We aim to set precedence and a  
48 framework by which others may structure further investigation into melatonin and other adjuvant  
49 therapies in the future. The intention of this study is as a pilot trial, primarily designed to provide  
50 un-biased data as a foundation for further research into this area. It is anticipated that the effect  
51 size observed in this trial will be useful to more appropriately power subsequent RCTs with the  
52 most effective dose of melatonin. In summary, MIART will be the first trial designed to determine  
53  
54  
55  
56  
57  
58  
59  
60

1  
2 a dose-response relationship of melatonin on biochemical and physiological markers of follicle  
3 health and also clinical pregnancy rates.  
4

5 **Contributors:**  
6

7 The idea for the trial was conceived by SF, LR, and EW. SF was involved in research design and  
8 primary writing of study protocol and manuscript. TO was involved in the design and writing of the  
9 manuscript. LR and EW were involved in the trial design, writing, editing and approval of the final  
10 manuscript.  
11  
12

13 **Funding**  
14

15 Funding statement: This work is supported both financially and in-kind by the Monash IVF  
16 Research and Education Foundation who peer-reviewed this study prior to the approval of  
17 funding. In-kind and financial support was also afforded by The Department of Obstetrics and  
18 Gynaecology, Monash University and The Ritchie Centre, MIMR-PHI. No funding agency had a role  
19 in the design, implementation or analysis of this trial.  
20  
21  
22

23 **Conflict of interest statement**  
24

25 SF is supported by an NHMRC Postgraduate Scholarship. No conflicts of interest are identified for  
26 SF, EW or TO. BV and LR are minority shareholders in Monash IVF. LR has received unconditional  
27 research and educational grants from MSD® and Merck Serono®. The trial sponsor had no  
28 influence on trial design, implementation, analysis or presentation.  
29  
30  
31  
32  
33  
34  
35  
36  
37  
38  
39  
40  
41  
42  
43  
44  
45  
46  
47  
48  
49  
50  
51  
52  
53  
54  
55  
56  
57  
58  
59  
60

## References

1. Kojo S. Vitamin C: basic metabolism and its function as an index of oxidative stress. *Curr Med Chem* 2004;11:1041-64.
2. Rahman K. Studies on free radicals, antioxidants, and co-factors. *Clin Interv Aging* 2007;2:219-36.
3. Bouayed J, Bohn T. Exogenous antioxidants - Double-edged swords in cellular redox state: Health beneficial effects at physiologic doses versus deleterious effects at high doses. *Oxid Med Cell Longev* 2010;3:228-37.
4. Valko M, Leibfritz D, Moncol J, et al. Free radicals and antioxidants in normal physiological functions and human disease. *Int J Biochem Cell Biol* 2007;39:44-84.
5. Tamura H, Takasaki A, Taketani T *et al.* The role of melatonin as an antioxidant in the follicle. *J Ovarian Res* 2012;5.
6. Guerin P, El Mouatassim S, Menezo Y. Oxidative stress and protection against reactive oxygen species in the pre-implantation embryo and its surroundings. *Hum Reprod Update* 2001;7:175-89.
7. Yoshida M, Ishigati K, Nagai T, et al. Glutathione concentration during maturation and after fertilization in pig oocytes: relevance to the ability of oocytes to form male pronucleus. *Biol Reprod* 1993;49:89-94.
8. Fatehi A, Roelen B, Colenbrander B *et al.* Presence of cumulus cells during in vitro fertilization protects the bovine oocyte against oxidative stress and improves first cleavage but does not affect further development. *Zygote* 2005;13:177-85.
9. Zeng H, Ren Z, Yeung W *et al.* Low mitochondrial DNA and ATP contents contribute to the absence of birefringent spindle imaged with PolScope in in vitro matured human oocytes. *Hum Reprod* 2007;22:1681-6.
10. Van Blerkom J, Davis P, Lee J. ATP content of human oocytes and developmental potential and outcome after in-vitro fertilization and embryo transfer *Hum Reprod* 1995;10:415-24.
11. Espey L. Current status of the hypothesis that mammalian ovulation is comparable to an inflammatory reaction. *Biol Reprod* 1994;50:233-8.
12. Tamura H, Takasaki A, Miwa I *et al.* Oxidative stress impairs oocyte quality and melatonin protects oocytes from free radical damage and improves fertilization rate. *J Pineal Res* 2008;44:280-7.
13. Tamura H, Taketani T, Takasaki A, et al. Influence of oxidative stress on oocyte quality and protective role of melatonin as an antioxidant. In: 20th World Congress on Fertility and Sterility, IFFS 2010. Vol. 7. Munich, Germany: Journal fur Reproduktionsmedizin und Endokrinologie, 2010:366.
14. Reiter R, Rosales-Corral S, Manchester L, Tan D. Peripheral reproductive organ health and melatonin: ready for prime time. *Int J Mol Sci* 2013;14:7231-72.
15. Lord T, Nixon B, Jones KT, et al. Melatonin prevents postovulatory oocyte aging in the mouse and extends the window for optimal fertilization in vitro. *Biol Reprod* 2013.
16. Wood S, Quinn A, Troupe S, et al. Seasonal variation in assisted conception cycles and the influence of photoperiodism on outcome in in vitro fertilization cycles. *Hum Fertil* 2006;9:223-9.
17. Agarwal A, Gupta S, Sharma RK. Role of oxidative stress in female reproduction. *Reprod Biol Endocrinol* 2005;3.
18. Srinivasan V, Spence W, Pandi-Perumal SR., et al. Melatonin and human reproduction: shedding light on the darkness hormone. *Gynecol Endocrinol* 2009;25:779-85.
19. Dholpuria S, Vyas S, Purohit GN, et al. Sonographic monitoring of early follicle growth induced by melatonin implants in camels and the subsequent fertility. *J Ultrasound* 2012;15:135-41.
20. Abecia JA, Palacin I, Forcada F, et al. The effect of melatonin treatment on the ovarian response of ewes to the ram effect. *Domest Anim Endocrinol* 2006;31:52-62.
21. Rodriguez-Osorio N, Kim I, Wang H, et al. Melatonin increases cleavage rate of porcine preimplantation embryos in vitro. *J Pineal Res* 2007;43:283-8.
22. Sanchez-Barcelo EJ, Mediavilla MD, Tan DX, et al. Clinical uses of melatonin: Evaluation of human trials. *Curr Med Chem* 2010;17:2070-95.



- 1  
2  
3  
4  
5  
6  
7  
8  
9  
10  
11  
12  
13  
14  
15  
16  
17  
18  
19  
20  
21  
22  
23  
24  
25  
26  
27  
28  
29  
30  
31  
32  
33  
34  
35  
36  
37  
38  
39  
40  
41  
42  
43  
44  
45  
46  
47  
48  
49  
50  
51  
52  
53  
54  
55  
56  
57  
58  
59  
60
23. Ishizuka B, Kuribayashi Y, Murai K, Amemiya A, Itoh M. The effect of melatonin on in vitro fertilization and embryo development in mice. *J Pineal Res* 2000;28:48-51.
  24. Choi J, Park S, Lee E *et al.* Anti-apoptotic effect of melatonin on preimplantation development of porcine parthenogenetic embryos. *Mol Reprod Dev* 2008;75:1127-35.
  25. Kang J, Koo O, Kwon D *et al.* Effects of melatonin on in vitro maturation of porcine oocyte and expression of melatonin receptor RNA in cumulus and granulosa cells. *J Pineal Res* 2009;46:22-8.
  26. Wei D, Zhang C, Xie J *et al.* Supplementation with low concentrations of melatonin improves nuclear maturation of human oocytes in vitro. *J Assist Reprod Genet* 2013;30:933-8.
  27. Kim M, Park E, Kim H *et al.* Does supplementation of in-vitro culture medium with melatonin improve IVF outcome in PCOS? *Reprod Biomed Online* 2013;26:22-9.
  28. Knapen M, Zusterzeel P, Peters W, *et al.* Glutathione and glutathione-related enzymes in reproduction: a review. *Eur J Obstet Gynecol Reprod Biol* 1999;82:171-84.
  29. Eryilmaz O, Devran A, Sarikaya E, *et al.* Melatonin improves the oocyte and the embryo in IVF patients with sleep disturbances, but does not improve the sleeping problems. *J Assist Reprod Genet* 2011;28:815-20.
  30. Batioğlu A, Şahin U, Gürlek B, *et al.* The efficacy of melatonin administration on oocyte quality. *Gynecol Endocrinol* 2012;28:91-3.
  31. Taketani T, Tamura H, Takasaki A *et al.* Protective role of melatonin in progesterone production by human luteal cells. *J Pineal Res* 2011;51:207-13.
  32. Manca M, Manunta M, Spezzigu A *et al.* Melatonin deprivation modifies follicle and corpora lutea growth dynamics in a sheep model (Epub ahead of print). *Reproduction* 2014.
  33. Baratta M, Tamanini C. Effect of melatonin on the in vitro secretion of progesterone and estradiol 17 beta by ovine granulosa cells. *Acta Endocrinol (Copenh)* 1992 127:366-70.
  34. Wallace J, Robinson J, Wigzell S, *et al.* Effect of melatonin on the peripheral concentrations of LH and progesterone after oestrus, and on conception rate in ewes. *J Endocrinol* 1988 119:523-30.
  35. Zhang L, Chai M, Tian X *et al.* Effects of melatonin on superovulation and transgenic embryo transplantation in small-tailed han sheep (*Ovis aries*). *Neuro Endocrinol Lett* 2013;34:294-301.
  36. Rizzo P, Raffone E, Benedetto V. Effect of the treatment with myo-inositol plus folic acid plus melatonin in comparison with a treatment with myo-inositol plus folic acid on oocyte quality and pregnancy outcome in IVF cycles. A prospective, clinical trial. *EmbaseEuropean Review for Medical and Pharmacological Sciences* 2010;14:555-61.
  37. Nazzaro A, Salerno A, Marino S, *et al.* The addition of melatonin to myo-inositol plus folic acid improve oocyte quality and pregnancy outcome in IVF cycle. A prospective clinical trial. . In: 27th Annual Meeting of the European Society of Human Reproduction and Embryology, ESHRE. Vol. 26. Stockholm Sweden: EmbaseHuman Reproduction, 2011:i227-i8.
  38. Pacchiarotti A, Carlomagno G, Unfer V, *et al.* Role of Myo-inositol and melatonin supplementation in follicular fluid of IVF patients with polycystic ovarian syndrome: a randomized controlled trial. *ClinicalTrialsgov* 2013.
  39. Unfer V, Raffone E, Rizzo P, *et al.* *et al.* Effect of a supplementation with myo-inositol plus melatonin on oocyte quality in women who failed to conceive in previous in vitro fertilization cycles for poor oocyte quality: a prospective, longitudinal, cohort study. *Gynaecol Endocrinol* 2011;27:857-61.
  40. Hemadi M, Shokri S, Pourmatroud E, *et al.* Follicular dynamic and immunoreactions of the vitrified ovarian graft after host treatment with variable regimens of melatonin. *Am J Reprod Immunol* 2012;67:401-12.
  41. Jahnke G, Marr M, Myers C, *et al.* Maternal and developmental toxicity evaluation of melatonin administered orally to pregnant Sprague-Dawley rats. *Toxicol Sci* 1999;50:271-9.
  42. Gonciarz M, Gonciarz Z, Bielanski W *et al.* The effects of long-term melatonin treatment on plasma liver enzymes levels and plasma concentrations of lipids and melatonin in patients with nonalcoholic steatohepatitis: a pilot study. *J Physiol Pharmacol* 2012;63:35-40.
  43. de Lourdes V. Seabra M, Bignotto M, *et al.* Randomized, double-blind clinical trial, controlled with placebo, of the toxicology of chronic melatonin treatment. *J Pineal Res* 2000;29:193-200.



- 1  
2  
3  
4  
5  
6  
7  
8  
9  
10  
11  
12  
13  
14  
15  
16  
17  
18  
19  
20  
21  
22  
23  
24  
25  
26  
27  
28  
29  
30  
31  
32  
33  
34  
35  
36  
37  
38  
39  
40  
41  
42  
43  
44  
45  
46  
47  
48  
49  
50  
51  
52  
53  
54  
55  
56  
57  
58  
59  
60
44. Goldberg-Stern H, Oren H, Peled N, et al. Effect of melatonin on seizure frequency in intractable epilepsy: a pilot study. *J Child Neurol* 2012;27:1524-8.
45. Del Fabbro E, Dev R, Hui D, et al. Effects of melatonin on appetite and other symptoms in patients with advanced cancer and cachexia: a double-blind placebo-controlled trial. *J Clin Oncol* 2013;31:1271-6.
46. Voordouw B, Euser R, Verdonk R *et al.* Melatonin and melatonin-progestin combinations alter pituitary-ovarian function in women and can inhibit ovulation. *J Clin Endocrinol Metab* 1992;74:108-17.
47. Weaver D. Reproductive safety of melatonin: a "wonder drug" to wonder about. *J Biol Rhythms* 1997;12:682.
48. . Centers for Disease Control and Prevention, American Society for Reproductive Medicine, Society for Assisted Reproductive Technology. 2011 Assisted reproductive technology fertility clinic success rates report. In. Atlanta (GA): US Dept of Health and Human Services, 2013.
49. Sampaio R, Conceição S, Miranda M, et al. MT3 melatonin binding site, MT1 and MT2 melatonin receptors are present in oocyte, but only MT1 is present in bovine blastocyst produced in vitro. *Reprod Biol Endocrinol* 2012;10.
50. Ciotta L, Stracquadio M, Pagano I, et al. Effects of myo-inositol supplementation on oocyte's quality in PCOS patients: a double blind trial. *Eur Rev Med Pharmacol Sci* 2011;15:509-14.
51. Nishihara T, Hashimoto S, Ito K *et al.* Oral melatonin supplementation improves oocyte and embryo quality in women undergoing in vitro fertilization-embryo transfer. *Gynecol Endocrinol* 2014;30:359-62.
52. Chan A, Tetzlaff J, Gøtzsche P *et al.* SPIRIT 2013 explanation and elaboration: guidance for protocols of clinical trials. *BMJ* 2013;346.
53. Clarke JF, van Rumste MM, Farquhar CM, et al. Measuring outcomes in fertility trials: can we rely on clinical pregnancy rates? *Fertil Steril* 2010;94:1647-51.
54. Altman D, Bland J. Treatment allocation by minimisation. *BMJ* 2005;330:843.
55. Mills E, Chan A, Wu P, Vail A, et al. Design, analysis, and presentation of crossover trials. *Trials* 2009;10.
56. Piantadosi S. *Clinical Trials: A Methodologic Perspective*. Wiley Series in Probability and Statistics. 2nd ed: John Wiley & Sons, 2013.

1  
2  
3  
4 **Figure Legends**

5  
6 **Figure 1: Participant timeline schematic - first cycle**

7  
8 <sup>a</sup>Placebo, melatonin 2mg twice daily, melatonin 4mg twice daily, melatonin 8mg twice daily

9  
10 hCG: human chorionic gonadotrophin; 8-OHdg: 8-hydroxy- 2'-deoxyguanosine

11  
12 Note: Patients who are not pregnant after their first cycle will be offered a second cycle with a different  
13 trial medication (Figure 2)

14  
15  
16  
17 **Figure 2: Participant timeline schematic - second cycle in those not pregnant after their first cycle**

18  
19 <sup>a</sup> For participants who do not become pregnant in their first cycle, each will be offered allocation to the next  
20 treatment arm for their second cycle (ie. A will be allocated to B, B to C, C to D and D to A)

21  
22 ET: embryo transfer; hCG: human chorionic gonadotrophin  
23  
24  
25  
26  
27  
28  
29  
30  
31  
32  
33  
34  
35  
36  
37  
38  
39  
40  
41  
42  
43  
44  
45  
46  
47  
48  
49  
50  
51  
52  
53  
54  
55  
56  
57  
58  
59  
60

Table 1: Clinical Secondary Outcomes

| Clinical outcomes                               | Definition                                                                                                                                                                                                                 |
|-------------------------------------------------|----------------------------------------------------------------------------------------------------------------------------------------------------------------------------------------------------------------------------|
| Live birth rate                                 | Birth of a live baby after 24 weeks gestation                                                                                                                                                                              |
| Miscarriage rate                                | Loss of a diagnosed clinical pregnancy before 20 weeks gestation                                                                                                                                                           |
| Sleepiness score                                | Based on Karolinska <sup>a</sup> sleepiness scale during trial medication administration                                                                                                                                   |
| Pregnancy complication and adverse events rates | Including OHSS, multiple pregnancy, congenital or chromosomal abnormalities, stillbirth, preeclampsia, delivery before 34 weeks, delivery between 34 and 37 weeks, placenta praevia, gestational diabetes, low birthweight |
| <b>Embryological outcomes</b>                   |                                                                                                                                                                                                                            |
| Total number of oocytes collected               |                                                                                                                                                                                                                            |
| Oocyte maturity                                 |                                                                                                                                                                                                                            |
| Total number of embryos                         |                                                                                                                                                                                                                            |
| Embryo quality                                  |                                                                                                                                                                                                                            |
| Fertilization rate                              | The proportion of oocytes that become fertilised                                                                                                                                                                           |
| Utilisation rate                                | Proportion of zygotes undergoing embryo transfer or cryopreservation to oocytes fertilised                                                                                                                                 |
| <b>Biochemical outcomes</b>                     |                                                                                                                                                                                                                            |
| Biochemical pregnancy rate                      | Presence of serum hCG level of >25IU/l on Day 16 after embryo transfer                                                                                                                                                     |
| Melatonin levels in serum                       | At baseline and prior to oocyte collection                                                                                                                                                                                 |
| Melatonin levels in follicular fluid            | Taken from leading follicle from each ovary at time of oocyte collection                                                                                                                                                   |
| 8-OHdg levels in serum                          | At baseline and prior to oocyte collection                                                                                                                                                                                 |
| 8-OHdg levels in follicular fluid               | Taken from leading follicle from each ovary at time of oocyte collection                                                                                                                                                   |
| Oestradiol and Progesterone levels in serum     | Taken at baseline, during treatment and at the time of oocyte collection                                                                                                                                                   |
| <b>Sonographic outcomes</b>                     |                                                                                                                                                                                                                            |
| Follicular blood flow                           | Measured on last transvaginal ultrasound with power Doppler prior to oocyte collection                                                                                                                                     |
| Uterine artery blood flow                       | Measured on last transvaginal ultrasound with power Doppler prior to oocyte collection                                                                                                                                     |

OHSS: Ovarian Hyperstimulation syndrome; hCG: human chorionic gonadotrophin; 8-OHdg: 8-hydroxy- 2'-deoxyguanosine

<sup>a</sup>Reyner L, Horne J. Falling asleep whilst driving: are drivers aware of prior sleepiness? Int J Legal Med 1998;111:120-3

1  
2  
3  
4  
5  
6  
7  
8  
9  
10  
11  
12  
13  
14  
15  
16  
17  
18  
19  
20  
21  
22  
23  
24  
25  
26  
27  
28  
29  
30  
31  
32  
33  
34  
35  
36  
37  
38  
39  
40  
41  
42  
43  
44  
45  
46  
47  
48  
49  
50  
51  
52  
53  
54  
55  
56  
57  
58  
59  
60

## A pilot double-blind randomised placebo-controlled dose-response trial assessing the effects of melatonin on infertility treatment (MIART): study protocol

### Corresponding Author:

Dr Shavi Fernando

shavif@hotmail.com

### Authors:

Dr Shavi Fernando

MBBS(hon) BMedSc(hon)

MIMR-PHI Institute of Medical Research 246 Clayton rd, Clayton Victoria Australia 3168

Department of Obstetrics and Gynaecology, Monash University, Clayton, Victoria Australia

Level 5, Monash Medical Centre, Clayton rd, Clayton, Victoria Australia 3168

Dr Tiki Osianlis

BSc(hon) PhD

Department of Obstetrics and Gynaecology, Monash University, Clayton, Victoria Australia

Monash IVF, 252 Clayton Rd, Clayton, Victoria Australia 3168

A/Prof Beverley Vollenhoven

MD PhD FRANZCOG CREI

Department of Obstetrics and Gynaecology, Monash University, Clayton Australia

Level 5, Monash Medical Centre, Clayton rd, Clayton, Victoria Australia 3168

Prof Euan Wallace

MBChB MD FRCOG FRANZCOG

MIMR-PHI Institute of Medical Research 246 Clayton rd, Clayton Victoria Australia 3168

1 Department of Obstetrics and Gynaecology, Monash University, Clayton, Australia

2  
3 Level 5, Monash Medical Centre, Clayton rd, Clayton, Victoria Australia 3168

4  
5  
6  
7 A/Prof Luk Rombauts

8  
9 MD PhD FRANZCOG CREI

10 MIMR-PHI Institute of Medical Research 246 Clayton rd, Clayton Victoria Australia 3168

11  
12 Department of Obstetrics and Gynaecology, Monash University, Clayton, Victoria Australia

13  
14  
15 Monash IVF, 252 Clayton Rd, Clayton, Victoria Australia 3168

16  
17  
18  
19  
20 **Trial Sponsor:**

21 The Ritchie Centre, Monash Medical Centre, Clayton rd, Clayton VIC AUS 3168

22  
23 03 95946666

24  
25  
26  
27  
28 **Running Title:** Melatonin in ART - MIART randomised trial: study protocol

29  
30  
31  
32 **Keywords:**

33 Melatonin, assisted reproductive technology (ART), in-vitro fertilization, oxidative stress, protocol

34  
35  
36  
37  
38 **Word Count:** 2796

## Abstract

### Introduction

High levels of oxidative stress can have considerable impact on the outcomes of in-vitro fertilization (IVF). Recent studies have reported that melatonin, a neurohormone secreted from the pineal gland in response to darkness, has significant anti-oxidative capabilities which may protect against the oxidative stress of infertility treatment on gametes and embryos. Early studies of oral melatonin (3-4mg/day) in IVF have suggested favourable outcomes. However, most trials were poorly designed and none have addressed the optimum dose of melatonin. We present a proposal for a pilot double-blind randomised placebo-controlled dose-response trial aimed to determine whether oral melatonin supplementation during ovarian stimulation can improve the outcomes of assisted reproductive technology.

### Methods and analyses

We will recruit 160 infertile women into one of four groups: placebo (n=40); melatonin 2mg twice per day (n=40); melatonin 4mg twice per day (n=40) and melatonin 8mg twice per day (n=40). The primary outcome will be clinical pregnancy rate. Secondary clinical outcomes include oocyte number/quality, embryo number/quality and fertilization rate. We will also measure serum melatonin and the oxidative stress marker, 8-hydroxy- 2'-deoxyguanosine (8-OHdg) at baseline and after treatment and levels of these in follicular fluid at egg pick-up. We will investigate follicular blood flow with Doppler ultrasound, patient sleepiness scores, and pregnancy complications, comparing outcomes between groups. This protocol has been designed in accordance with the SPIRIT 2013 Guidelines.

### Ethics and dissemination:

Ethical approval has been obtained from Monash Health HREC (Ref: 13402B), Monash University HREC (Ref: CF14/523 – 2014000181) and Monash Surgical Private Hospital HREC (Ref: 14107). Data analysis, interpretation and conclusions will be presented at national and international conferences and published in peer-reviewed journals.

**Registration Details:** Version 1. Australian New Zealand Clinical Trials Registry, ACTRN: ACTRN12613001317785. The complete WHO Registration Data Set, as described by the SPIRIT 2013 guidelines is available for viewing at <https://www.anzctr.org.au/Trial/Registration/TrialReview.aspx?id=365376>

## Strengths and limitations

- This trial is a well-designed pilot study to achieve biochemically and clinically relevant outcomes.
- Significant preliminary research has been performed in order to appropriately design the study to fill gaps in current knowledge.
- This is the first placebo controlled dose-finding trial of melatonin in the field of infertility world-wide and if successful, has the potential to provide a foundation for future large randomised controlled trials.
- Because of constraints of such a pilot study in the infertile population, relatively small numbers of participants are anticipated. To help minimise the effect of this, a cross-over arm will be introduced. It is expected that this limitation will be overcome in future trials that will be designed based on this study.

## Introduction

Humans are aerobic organisms and when oxygen is utilised in metabolic processes, free oxygen radicals are created as a consequence. These radicals are oxidants and contain 'free' valence electrons, making them highly unstable and therefore reactive, capable of causing injury to cells. This occurs by accepting electrons from another molecule (a reductant) in order to reach stability. In doing so, the chemical structure of the reductant is changed, and may no longer be able to perform its designated function. In fact, often the reductant can then produce or sometimes even become an oxidant having the potential to cause oxidative stress in its own right.<sup>1</sup> Anti-oxidative agents are present endogenously and can also be administered exogenously. They are designed to reduce free radicals by donating electrons to stabilise the free radical.<sup>2</sup> The term 'reactive oxygen species' (ROS), not only includes free radicals but also molecularly stable non-radical molecules which contain oxygen and are capable of causing oxidative stress, such as hydrogen peroxide (H<sub>2</sub>O<sub>2</sub>).<sup>3</sup> While ROS are necessary for essential physiological processes, an overabundance can result in cellular and tissue damage and this is commonly referred to as 'oxidative stress'.<sup>4</sup> Oxidative stress can be measured in bodily fluids by markers including 8-hydroxy- 2'-deoxyguanosine (8-OHdg).<sup>5</sup>

Over recent years, the potential role of oxidative stress in the outcomes of assisted reproductive technology (ART) has been gaining increasing attention, in particular with regards to in-vitro fertilization (IVF) and intracytoplasmic sperm injection (ICSI). This is perhaps not surprising given that ART exposes both oocytes and embryos to high levels of superoxide free radicals during gamete and embryo culture<sup>6</sup>. Indeed, in addition to the culture conditions, *in vitro* the oocytes are not afforded the normal protection of the antioxidant-rich follicular fluid or surrounding cumulus cells, leaving them more susceptible to oxidative damage.<sup>7,8</sup> Reproductive processes such as chromosome segregation (resulting in euploid oocytes), polar body extrusion (necessary for haploid oocytes), fertilization and early cleavage (to avoid arrested embryos) require energy. As the average age of women seeking fertility treatment rises, the level of ROS and subsequent oxidative stress increases, resulting in mitochondrial DNA mutations which in turn affect ATP production in the oocyte. Without the necessary ATP, required cellular processes cannot occur correctly, having a direct effect on the quality of the oocyte, embryo and the final outcome of the IVF procedure.<sup>9,10</sup>

It has been shown that oocyte quality begins to deteriorate immediately following ovulation. This has been thought to be an inflammatory driven oxidative stress process<sup>11</sup> whereby the production of cytokines and proteases is associated with an increase in ROS which in turn impair oocyte maturation.<sup>12-14</sup> Evidence of oxidative damage in *in vitro* oocytes has been shown to exist as early as 8 hours after ovulation.<sup>15</sup> Nor surprisingly it has been shown that high levels of the oxidative stress in the follicular fluid of infertile women are associated with poor oocyte maturation and embryo quality, and that inducers of oxidative stress can be used to inhibit oocyte maturation.<sup>5,12</sup>



1  
2 Together, these observations highlighting the importance of oxidative stress in the developing  
3 follicle and in the future success of fertilization, whether *in vivo* or *in vitro*.  
4

5 Recently, it has been shown that melatonin, a neurohormone secreted from the pineal gland, has  
6 important oxygen-scavenging properties which naturally mitigate oxidative stress by both  
7 neutralising ROS in human tissues and by inducing endogenous anti-oxidant enzymes.<sup>16-18</sup>

8 Melatonin has been shown to be beneficial as an adjuvant therapy in the management of many  
9 medical conditions in which oxidative stress has been implicated including diabetes, glaucoma,  
10 irritable bowel syndrome and fertility.<sup>19-22</sup>  
11

12 The effects of melatonin supplementation on culture media,<sup>12, 21, 23-27</sup> gametes,<sup>5, 15, 28</sup> embryos<sup>15,</sup>  
13 <sup>29, 30</sup> and luteal function<sup>31-35</sup> have been identified as useful areas for investigation. Human clinical  
14 studies have begun recently, with emphasis on oral supplementation of melatonin during the  
15 stimulation cycle and its effects on oocyte and embryo quality.<sup>12, 36-39</sup>  
16

17 Importantly, melatonin has a remarkably benign safety profile in both animal and human studies.  
18 A mouse study investigating dose-related effects of melatonin on ovarian grafts found that doses  
19 at 200mg/kg/day have immunosuppressant effects, leading to prolongation of graft survival,  
20 however, also resulted in a reduction in healthy follicles. They concluded that doses of greater  
21 than 20mg/kg/day resulted in a reduction in both healthy follicles and ovarian size.<sup>40</sup> The maternal  
22 lowest observed adverse effect level (LOAEL), the lowest level at which an adverse event was  
23 observed, appears to be around 200mg/kg/day, equivalent to over 1g per day for humans.  
24 Furthermore, in rodent studies, no significant adverse effects on either the embryo or fetus have  
25 been reported for up to doses of 200mg/kg/day.<sup>41</sup> There have been several randomised controlled  
26 trials addressing high doses of melatonin in human adults and children,<sup>42-46</sup> and reports have  
27 established that toxicity levels in humans are not reached until a daily dose of at least 5mg/kg.<sup>47</sup>  
28  
29  
30  
31  
32  
33  
34  
35  
36  
37

### 38 Rationale

39 In the USA in 2011, only 1 in 4 of all IVF cycles resulted in clinical pregnancy with less than 1 in 5  
40 cycles resulting in live birth<sup>48</sup>. That is 4 out of 5 IVF cycles do not result in a live baby. Clearly there  
41 is much room for further improvement, if only to meet societal expectations and reduce  
42 healthcare costs. Continued research into novel adjuvant therapies designed to improve IVF  
43 outcomes is therefore merited. Several human and animal studies support the use of melatonin in  
44 the treatment of infertility, with beneficial actions being largely attributed to its anti-oxidant  
45 properties. Furthermore, melatonin receptors are found on granulosa cells, oocytes and  
46 embryos,<sup>49</sup> with intrafollicular melatonin concentrations being significantly higher than those  
47 found in serum, again suggesting a physiological role in reproduction.<sup>39, 67, 68</sup> The human studies  
48 addressing the use of melatonin in infertility treatment undertaken to date have been small and  
49 not placebo-controlled. None have attempted to identify an optimal dose.<sup>36-38, 50</sup> Further,  
50 interpretation of any outcomes have been hampered by the within-patient comparison design,  
51 where patients act as their own controls.<sup>12, 39, 51</sup>  
52  
53  
54  
55  
56  
57  
58  
59  
60

1 We have designed this study to be the first placebo-controlled, dose-finding clinical trial to  
2 investigate the effect(s), if any, of oral melatonin on the clinical pregnancy rate following IVF/ICSI  
3 treatment.  
4  
5  
6  
7

### 8 **Aims**

9  
10 The overall aim of this trial is to determine whether oral melatonin administration can improve the  
11 outcomes of IVF/ICSI. In order to address this, we will determine whether melatonin  
12 administration has a dose-response effect in women undergoing IVF/ICSI on:  
13  
14

- 15 1. biochemical markers of follicle and oocyte health (melatonin, 8-hydroxy- 2'-  
16 deoxyguanosine (8-OHdg), progesterone, oestradiol)
  - 17 2. sonographic markers of follicle health
  - 18 3. patient sleepiness
  - 19 4. pregnancy rate following IVF/ICSI
- 20  
21  
22  
23  
24  
25  
26  
27

### 28 **Methods and analyses**

29  
30 This protocol has been designed in accordance with the SPIRIT 2013 Guidelines.<sup>52</sup> Recruitment will  
31 commence in July 2014. This will occur over two years. Analysis and dissemination will occur after  
32 this period of time. The study is expected to be completed by February 2017.  
33  
34  
35  
36  
37

### 38 **Study design**

39 Pilot phase II cross-over double-blinded randomised placebo-controlled dose-response trial  
40  
41  
42

### 43 **Subjects**

44 We plan to recruit a total of 160 infertile women undergoing IVF/ICSI.  
45  
46  
47  
48  
49

### 50 **Study setting**

51 Patients will be recruited from Monash IVF infertility clinics in Melbourne, Australia over a period  
52 of 2 years.  
53  
54  
55  
56  
57

## Interventions to be measured

This trial will have four arms. All capsules will be indistinguishable from each other.

1. Placebo capsule taken twice per day
2. 2mg melatonin capsule twice per day (4mg/d total)
3. 4mg melatonin capsule twice per day (8mg/d total)
4. 8mg melatonin capsule twice per day (16mg/d total)

## Primary Outcome

Clinical pregnancy rate,<sup>53</sup> defined as the presence of a live pregnancy in the uterine cavity at a transvaginal ultrasound (TVUS) at 6-8 weeks' gestation.

## Secondary outcomes

See *Table 1* for details.

## Sample Size

As this is a pilot dose-finding study, without precedence on which to base accurate power calculations, a power calculation has not been performed. Part of our aim is to provide clarification allowing for larger randomised trials to be designed in the future. We hypothesise that melatonin will have a positive dose-response effect on clinical pregnancy rates after IVF/ICSI. We have chosen a convenience sample of 160 participants, 40 in each of the four groups, in order to assess plausible morphological, biochemical and sonographic surrogate markers for oocyte quality, as well as to provide an indication of the effect size for each dose for our primary outcome, clinical pregnancy rate. Conservatively estimating that, in total, 50% of patients (n=80) do not get pregnant after their first cycle, we may assume that 60 patients will participate in the crossover arm (allowing for drop-outs) in their second cycle and be allocated to a different treatment group.

## Inclusion criteria

1. Undergoing first cycle of IVF or ICSI
2. Age between 18 and 45

3. Body mass index (BMI) between 18 and 35
4. Undergoing a GnRH antagonist cycle (without OCP scheduling)

#### Exclusion criteria

1. Current untreated pelvic pathology – moderate to severe endometriosis, submucosal uterine fibroids/polyps assessed by the treating specialist to affect fertility, pelvic inflammatory disease, uterine malformations, Asherman's syndrome and hydrosalpinx.
2. Currently enrolled in another interventional clinical trial
3. Concurrent use of other adjuvant therapies (eg. Chinese herbs, acupuncture)
4. Current pregnancy
5. Malignancy or other contraindication to IVF
6. Autoimmune disorders
7. Undergoing preimplantation genetic diagnosis (PGD)
8. Hypersensitivity to melatonin or its metabolites
9. Concurrent use of any of the following medications
  - a. Fluvoxamine (eg. Luvox, Movox, Voxam)
  - b. Cimetidine (eg. Magicul, Tagamet)
  - c. Quinolones and other CYP1A2 inhibitors (Ciprofloxacin, Avalox)
  - d. Carbamazepine (eg. Tegretol), rifampicin (eg. Rifadin) and other CYP1A2 inducers
  - e. Zolpidem (eg. Stilnox), zopiclone (eg. Imovane) and other non-benzodiazepine hypnotics
10. Inability to comply with trial protocol

#### Concomitant care

Aside from trial protocol and inclusion/exclusion criteria listed above, standard concomitant care, such as folic acid supplements, is permitted.

## Participant enrolment

This trial will begin recruitment at the level of the infertility specialist. Once identified as requiring IVF/ICSI, and satisfying inclusion and exclusion criteria, the patient will be provided with detailed written information about the trial protocol. After approximately one week, the patient will be approached and written informed consent will be obtained by the principle investigator at the first visit with the infertility clinic nurse. Baseline blood tests will be taken and basic demographic information including aetiology of infertility will then be taken recorded. ~~and T~~ the patient will will then be randomised by the principle investigator (see below) to one of the study arms and provided with the trial medication. The participant will commence taking the trial medication on the day that ovarian stimulation injections begin (Day 2-3 of menses) at 0800 and 2200 each day, with the last capsule being taken at 2200 the night before oocyte collection.

For a summarised participant timeline, See *Figure 1* and *Figure 2*.

## Allocation concealment, blinding and randomisation

Each treatment arm will be randomly allocated a letter (A, B, C or D) by way of opaque sealed envelope. Randomisation will be computerised and patients will be randomised at a ratio of 1:1:1:1 to one of the groups, A-D, using the minimisation method, a method of randomisation accounting for factors known to affect the outcome used in small trials to prevent selection bias.<sup>54</sup>

With a crossover design improved patient recruitment is very likely because all non-pregnant participants will be guaranteed at least one cycle with one of the doses of melatonin.<sup>55, 56</sup> After completing the first study cycle, those participants that are not pregnant will be recruited for the cross-over cycle in which they will be assigned the next treatment arm. For example, if a participant were allocated to treatment group A in their first cycle and did not become pregnant, they would be offered allocation to group B in their second cycle and so on.

Participants will be blinded by receiving identical-appearing unmarked capsules. All trial researchers will be blinded to treatment allocation group until after analyses are performed at the completion of the trial. A Data Safety Monitoring Committee (see *Adverse events* for details) and dispensing pharmacy will be aware of allocation to allow identification of any unbalanced or multiple serious adverse events that may necessitate emergency unblinding of researchers and participants.

## Adherence and retention

In order to ensure the integrity of study data, participant adherence to trial protocol will be assessed on a medication administration record updated daily by the participant. At oocyte collection, participants will return medication bottles and compliance will be confirmed by

1 counting remaining tablets. This will be recorded on individual patient compliance forms and  
2 patient record forms. Every reasonable effort will be made from the time of enrolment until the  
3 end of follow-up to maintain contact with and maintain subject participation in the trial.  
4  
5  
6  
7

### 8 **Analysis plan**

9  
10 SPSS v22.0 (IBM, Armonk, New York) will be used for data analysis. Primary analysis will occur by  
11 the intention-to-treat principle. A secondary analysis will be performed for 'actual treatment  
12 received'. Statistical analyses will be performed using Chi-square tests for dichotomous categorical  
13 outcome variables. Clinical and demographic data will be analysed with parametric tests if they are  
14 normally distributed (ANOVA with Bonferroni adjustment), otherwise appropriate non-parametric  
15 tests will be implemented (Kruskal-Wallis for between group analyses). Within patient changes  
16 (paired data), for example when comparing serum levels of melatonin at baseline and after  
17 treatment, will be compared using repeated measures ANOVA or Wilcoxon signed rank test  
18 depending on normality of data.  $P < 0.05$  will be considered statistically significant. Where  
19 statistically sound, adjusted odds ratios will be calculated to account for confounders or effect  
20 modifiers. To account for missing data, two analyses will be run, with the first excluding missing  
21 values and the second by imputation of missing values to determine how conclusions are affected.  
22  
23  
24  
25  
26  
27  
28  
29

### 30 **Adverse events and data safety and monitoring**

31  
32 An independent Data Safety and Monitoring Committee (DSMC) has been established at Monash  
33 Health in order to monitor occurrences of adverse events. The principle investigator will be  
34 available by telephone at all times during the trial and participants will be provided with contact  
35 details in case of any adverse events. Participants will also be interviewed at the time of their  
36 ultrasound and the day of oocyte collection to ascertain the occurrence of any adverse events.  
37 Serious adverse events will be recorded separately and followed up until resolution. Such events  
38 will be reported to the Monash Health, Monash University, Monash Surgical Private Hospital and  
39 Epworth HealthCare Human Research Ethics Committees, the Monash Health DSMC, the Monash  
40 Health Therapeutics Committee and, if directed by HREC, to the Australian Therapeutics and  
41 Goods Administration.  
42  
43  
44  
45  
46  
47  
48

### 49 **Trial modification and discontinuation**

50  
51 In the absence of adverse events, the medication regimen will not be modified once commenced.  
52 If other protocol changes are deemed necessary by the investigating team, ethics approval will be  
53 sought from all approving Human Research Ethics Committees. Once approved, protocol  
54 amendments will be notified to all investigators, administrators (eg. dispensing pharmacy) and  
55 trial participants via telephone.  
56  
57  
58  
59  
60

1  
2 Patients are permitted to discontinue their inclusion in the trial at any point in time at their  
3 request or following an unexpected serious adverse event as described above. The DSMC will  
4 perform an interim analysis specifically assessing adverse events after 50% of participants have  
5 been recruited. Otherwise, the trial will cease follow-up once patients have given birth from a trial  
6 treatment cycle.  
7  
8  
9

### 10 11 **Data collection, informed consent forms and confidentiality**

12  
13 Data will be recorded in both hardcopy and electronic form. Hardcopies will be stored in a secured  
14 filing cabinet at the administering institution. Electronic copies will be stored in encrypted files on  
15 a password protected computer. All data will be kept for 15 years, following this time, hardcopies  
16 will be destroyed by shredding or burning and electronic copies will be deleted by formatting.  
17  
18 Organic samples will be stored until analysis in a secured locked temperature-controlled freezer at  
19 the Monash Institute of Medical Research that can only be accessed by authorized staff. Samples  
20 and participant records will not contain any directly identifiable information. No additional  
21 biological samples will be kept for use in ancillary studies.  
22  
23  
24

25 For access to data collection forms, including sleep diaries, medication compliance and informed  
26 consent forms please contact the principle investigator.  
27  
28  
29

### 30 31 **Ethics and dissemination**

32  
33 Ethical approval has been obtained from Monash Health HREC (Ref:13402B), Monash University  
34 HREC (Ref: CF14/523 – 2014000181) and Monash Surgical Private Hospital HREC (Ref: 14107). Data  
35 analysis, interpretation and conclusions will be presented at national and international  
36 conferences and published in peer-reviewed journals. De-identified summary results will also be  
37 made publically available on the Monash IVF website.  
38  
39  
40  
41

### 42 43 **Discussion**

44  
45 The MIART trial has the potential to improve IVF treatment protocols, with both immediate and  
46 translational benefit to patients. If melatonin is found to improve outcomes after IVF/ICSI, it may  
47 become a routine part of management of the infertile couple. We aim to set precedence and a  
48 framework by which others may structure further investigation into melatonin and other adjuvant  
49 therapies in the future. The intention of this study is as a pilot trial, primarily designed to provide  
50 un-biased data as a foundation for further research into this area. It is anticipated that the effect  
51 size observed in this trial will be useful to more appropriately power subsequent RCTs with the  
52 most effective dose of melatonin. In summary, MIART will be the first trial designed to determine  
53  
54  
55  
56  
57  
58  
59  
60



1  
2 a dose-response relationship of melatonin on biochemical and physiological markers of follicle  
3 health and also clinical pregnancy rates.  
4

#### 5 **Contributors:**

6  
7 The idea for the trial was conceived by SF, LR, and EW. SF was involved in research design and  
8 primary writing of study protocol and manuscript. TO was involved in the design and writing of the  
9 manuscript. LR and EW were involved in the trial design, writing, editing and approval of the final  
10 manuscript.  
11  
12

#### 13 **Funding**

14  
15 Funding statement: This work is supported both financially and in-kind by the Monash IVF  
16 Research and Education Foundation who peer-reviewed this study prior to the approval of  
17 funding. In-kind and financial support was also afforded by The Department of Obstetrics and  
18 Gynaecology, Monash University and The Ritchie Centre, MIMR-PHI. No funding agency had a role  
19 in the design, implementation or analysis of this trial.  
20  
21  
22

#### 23 **Conflict of interest statement**

24  
25 SF is supported by an NHMRC Postgraduate Scholarship. No conflicts of interest are identified for  
26 SF, EW or TO. BV and LR are minority shareholders in Monash IVF. LR has received unconditional  
27 research and educational grants from MSD® and Merck Serono®. The trial sponsor had no  
28 influence on trial design, implementation, analysis or presentation.  
29  
30  
31  
32  
33

#### 34 **References**

- 35  
36 1. Kojo S. Vitamin C: basic metabolism and its function as an index of oxidative stress. *Curr Med Chem*  
37 2004;11:1041-64.  
38 2. Rahman K. Studies on free radicals, antioxidants, and co-factors. *Clin Interv Aging* 2007;2:219-36.  
39 3. Bouayed J, Bohn T. Exogenous antioxidants - Double-edged swords in cellular redox state: Health  
40 beneficial effects at physiologic doses versus deleterious effects at high doses. *Oxid Med Cell Longev*  
41 2010;3:228-37.  
42 4. Valko M, Leibfritz D, Moncol J, Cronin M, Mazur M, Telser J. Free radicals and antioxidants in  
43 normal physiological functions and human disease. *Int J Biochem Cell Biol* 2007;39:44-84.  
44 5. Tamura H, Takasaki A, Taketani T *et al*. The role of melatonin as an antioxidant in the follicle. *J*  
45 *Ovarian Res* 2012;5.  
46 6. Guerin P, El Mouatassim S, Menezo Y. Oxidative stress and protection against reactive oxygen  
47 species in the pre-implantation embryo and its surroundings. *Hum Reprod Update* 2001;7:175-89.  
48 7. Yoshida M, Ishigati K, Nagai T, Chikyu M, Pursel V. Glutathione concentration during maturation  
49 and after fertilization in pig oocytes: relevance to the ability of oocytes to form male pronucleus. *Biol Reprod*  
50 1993;49:89-94.  
51 8. Fatehi A, Roelen B, Colenbrander B *et al*. Presence of cumulus cells during in vitro fertilization  
52 protects the bovine oocyte against oxidative stress and improves first cleavage but does not affect further  
53 development. *Zygote* 2005;13:177-85.  
54  
55  
56  
57  
58  
59  
60



- 1  
2  
3  
4  
5  
6  
7  
8  
9  
10  
11  
12  
13  
14  
15  
16  
17  
18  
19  
20  
21  
22  
23  
24  
25  
26  
27  
28  
29  
30  
31  
32  
33  
34  
35  
36  
37  
38  
39  
40  
41  
42  
43  
44  
45  
46  
47  
48  
49  
50  
51  
52  
53  
54  
55  
56  
57  
58  
59  
60
9. Zeng H, Ren Z, Yeung W *et al.* Low mitochondrial DNA and ATP contents contribute to the absence of birefringent spindle imaged with PolScope in in vitro matured human oocytes. *Hum Reprod* 2007;22:1681-6.
10. Van Blerkom J, Davis P, Lee J. ATP content of human oocytes and developmental potential and outcome after in-vitro fertilization and embryo transfer *Hum Reprod* 1995;10:415-24.
11. Espey L. Current status of the hypothesis that mammalian ovulation is comparable to an inflammatory reaction. *Biol Reprod* 1994;50:233-8.
12. Tamura H, Takasaki A, Miwa I *et al.* Oxidative stress impairs oocyte quality and melatonin protects oocytes from free radical damage and improves fertilization rate. *J Pineal Res* 2008;44:280-7.
13. Tamura H, Taketani T, Takasaki A, Sugino N. Influence of oxidative stress on oocyte quality and protective role of melatonin as an antioxidant. In: 20th World Congress on Fertility and Sterility, IFFS 2010. Vol. 7. Munich, Germany: Journal fur Reproduktionsmedizin und Endokrinologie, 2010:366.
14. Reiter R, Rosales-Corral S, Manchester L, Tan D. Peripheral reproductive organ health and melatonin: ready for prime time. *Int J Mol Sci* 2013;14:7231-72.
15. Lord T, Nixon B, Jones KT, Aitken RJ. Melatonin prevents postovulatory oocyte aging in the mouse and extends the window for optimal fertilization in vitro. *Biol Reprod* 2013.
16. Wood S, Quinn A, Troupe S, Kingsland C, Lewis-Jones I. Seasonal variation in assisted conception cycles and the influence of photoperiodism on outcome in in vitro fertilization cycles. *Hum Fertil* 2006;9:223-9.
17. Agarwal A, Gupta S, Sharma RK. Role of oxidative stress in female reproduction. *Reprod Biol Endocrinol* 2005;3.
18. Srinivasan V, Spence W, Pandi-Perumal SR., Zakharia R, Bhatnagar K, Brzezinski A. Melatonin and human reproduction: shedding light on the darkness hormone. *Gynecol Endocrinol* 2009;25:779-85.
19. Dholpuria S, Vyas S, Purohit GN, Pathak KML. Sonographic monitoring of early follicle growth induced by melatonin implants in camels and the subsequent fertility. *J Ultrasound* 2012;15:135-41.
20. Abecia JA, Palacin I, Forcada F, Valares JA. The effect of melatonin treatment on the ovarian response of ewes to the ram effect. *Domest Anim Endocrinol* 2006;31:52-62.
21. Rodriguez-Osorio N, Kim I, Wang H, Kaya A, Memili E. Melatonin increases cleavage rate of porcine preimplantation embryos in vitro. *J Pineal Res* 2007;43:283-8.
22. Sanchez-Barcelo EJ, Mediavilla MD, Tan DX, Reiter RJ. Clinical uses of melatonin: Evaluation of human trials. *Curr Med Chem* 2010;17:2070-95.
23. Ishizuka B, Kuribayashi Y, Murai K, Amemiya A, Itoh M. The effect of melatonin on in vitro fertilization and embryo development in mice. *J Pineal Res* 2000;28:48-51.
24. Choi J, Park S, Lee E *et al.* Anti-apoptotic effect of melatonin on preimplantation development of porcine parthenogenetic embryos. *Mol Reprod Dev* 2008;75:1127-35.
25. Kang J, Koo O, Kwon D *et al.* Effects of melatonin on in vitro maturation of porcine oocyte and expression of melatonin receptor RNA in cumulus and granulosa cells. *J Pineal Res* 2009;46:22-8.
26. Wei D, Zhang C, Xie J *et al.* Supplementation with low concentrations of melatonin improves nuclear maturation of human oocytes in vitro. *J Assist Reprod Genet* 2013;30:933-8.
27. Kim M, Park E, Kim H *et al.* Does supplementation of in-vitro culture medium with melatonin improve IVF outcome in PCOS? *Reprod Biomed Online* 2013;26:22-9.
28. Knapen M, Zusterzeel P, Peters W, Steegers E. Glutathione and glutathione-related enzymes in reproduction: a review. *Eur J Obstet Gynecol Reprod Biol* 1999;82:171-84.
29. Eryilmaz O, Devran A, Sarikaya E, Aksakal F, Mollamahmutoğlu L, Cicek N. Melatonin improves the oocyte and the embryo in IVF patients with sleep disturbances, but does not improve the sleeping problems. *J Assist Reprod Genet* 2011;28:815-20.
30. Batioğlu A, Şahin U, Gürlek B, Öztürk N, Ünsal E. The efficacy of melatonin administration on oocyte quality. *Gynecol Endocrinol* 2012;28:91-3.
31. Taketani T, Tamura H, Takasaki A *et al.* Protective role of melatonin in progesterone production by human luteal cells. *J Pineal Res* 2011;51:207-13.
32. Manca M, Manunta M, Spezzigu A *et al.* Melatonin deprivation modifies follicle and corpora lutea growth dynamics in a sheep model (Epub ahead of print). *Reproduction* 2014.

- 1  
2  
3  
4  
5  
6  
7  
8  
9  
10  
11  
12  
13  
14  
15  
16  
17  
18  
19  
20  
21  
22  
23  
24  
25  
26  
27  
28  
29  
30  
31  
32  
33  
34  
35  
36  
37  
38  
39  
40  
41  
42  
43  
44  
45  
46  
47  
48  
49  
50  
51  
52  
53  
54  
55  
56  
57  
58  
59  
60
33. Baratta M, Tamanini C. Effect of melatonin on the in vitro secretion of progesterone and estradiol 17 beta by ovine granulosa cells. *Acta Endocrinol (Copenh)* 1992 127:366-70.
34. Wallace J, Robinson J, Wigzell S, Aitken R. Effect of melatonin on the peripheral concentrations of LH and progesterone after oestrus, and on conception rate in ewes. *J Endocrinol* 1988 119:523-30.
35. Zhang L, Chai M, Tian X *et al*. Effects of melatonin on superovulation and transgenic embryo transplantation in small-tailed han sheep (*Ovis aries*). *Neuro Endocrinol Lett* 2013;34:294-301.
36. Rizzo P, Raffone E, Benedetto V. Effect of the treatment with myo-inositol plus folic acid plus melatonin in comparison with a treatment with myo-inositol plus folic acid on oocyte quality and pregnancy outcome in IVF cycles. A prospective, clinical trial. *EmbaseEuropean Review for Medical and Pharmacological Sciences* 2010;14:555-61.
37. Nazzaro A, Salerno A, Marino S, Granato C, Pastore E. The addition of melatonin to myo-inositol plus folic acid improve oocyte quality and pregnancy outcome in IVF cycle. A prospective clinical trial. . In: 27th Annual Meeting of the European Society of Human Reproduction and Embryology, ESHRE. Vol. 26. Stockholm Sweden: EmbaseHuman Reproduction, 2011:i227-i8.
38. Pacchiarotti A, Carlomagno G, Unfer V, Frati P, Pacchiarotti A, Prapas N. Role of Myo-inositol and melatonin supplementation in follicular fluid of IVF patients with polycystic ovarian syndrome: a randomized controlled trial. *ClinicalTrialsgov* 2013.
39. Unfer V, Raffone E, Rizzo P, Buffo S. Effect of a supplementation with myo-inositol plus melatonin on oocyte quality in women who failed to conceive in previous in vitro fertilization cycles for poor oocyte quality: a prospective, longitudinal, cohort study. *Gynaecol Endocrinol* 2011;27:857-61.
40. Hemadi M, Shokri S, Pourmatroud E, Moramezi F, Khodadai A. Follicular dynamic and immunoreactions of the vitrified ovarian graft after host treatment with variable regimens of melatonin. *Am J Reprod Immunol* 2012;67:401-12.
41. Jahnke G, Marr M, Myers C, Wilson R, Travlos G, Price C. Maternal and developmental toxicity evaluation of melatonin administered orally to pregnant Sprague-Dawley rats. *Toxicol Sci* 1999;50:271-9.
42. Gonciarz M, Gonciarz Z, Bielanski W *et al*. The effects of long-term melatonin treatment on plasma liver enzymes levels and plasma concentrations of lipids and melatonin in patients with nonalcoholic steatohepatitis: a pilot study. *J Physiol Pharmacol* 2012;63:35-40.
43. de Lourdes V. Seabra M, Bignotto M, Pinto Jr L, Tufik S. Randomized, double-blind clinical trial, controlled with placebo, of the toxicology of chronic melatonin treatment. *J Pineal Res* 2000;29:193-200.
44. Goldberg-Stern H, Oren H, Peled N, Garty B. Effect of melatonin on seizure frequency in intractable epilepsy: a pilot study. *J Child Neurol* 2012;27:1524-8.
45. Del Fabbro E, Dev R, Hui D, Palmer L, Bruera E. Effects of melatonin on appetite and other symptoms in patients with advanced cancer and cachexia: a double-blind placebo-controlled trial. *J Clin Oncol* 2013;31:1271-6.
46. Voordouw B, Euser R, Verdonk R *et al*. Melatonin and melatonin-progestin combinations alter pituitary-ovarian function in women and can inhibit ovulation. *J Clin Endocrinol Metab* 1992;74:108-17.
47. Weaver D. Reproductive safety of melatonin: a "wonder drug" to wonder about. *J Biol Rhythms* 1997;12:682.
48. . Centers for Disease Control and Prevention, American Society for Reproductive Medicine, Society for Assisted Reproductive Technology. 2011 Assisted reproductive technology fertility clinic success rates report. In. Atlanta (GA): US Dept of Health and Human Services, 2013.
49. Sampaio R, Conceição S, Miranda M, Sampaio Lde F, Ohashi O. MT3 melatonin binding site, MT1 and MT2 melatonin receptors are present in oocyte, but only MT1 is present in bovine blastocyst produced in vitro. *Reprod Biol Endocrinol* 2012;10.
50. Ciotta L, Stracquadanio M, Pagano I, Carbonaro A, Palumbo M, Gulino F. Effects of myo-inositol supplementation on oocyte's quality in PCOS patients: a double blind trial. *Eur Rev Med Pharmacol Sci* 2011;15:509-14.
51. Nishihara T, Hashimoto S, Ito K *et al*. Oral melatonin supplementation improves oocyte and embryo quality in women undergoing in vitro fertilization-embryo transfer. *Gynecol Endocrinol* 2014;30:359-62.
52. Chan A, Tetzlaff J, Gøtzsche P *et al*. SPIRIT 2013 explanation and elaboration: guidance for protocols of clinical trials. *BMJ* 2013;346.

- 1  
2  
3  
4  
5  
6  
7  
8  
9  
10  
11  
12  
13  
14  
15  
16  
17  
18  
19  
20  
21  
22  
23  
24  
25  
26  
27  
28  
29  
30  
31  
32  
33  
34  
35  
36  
37  
38  
39  
40  
41  
42  
43  
44  
45  
46  
47  
48  
49  
50  
51  
52  
53  
54  
55  
56  
57  
58  
59  
60
53. Clarke JF, van Rumste MM, Farquhar CM, Johnson NP, Mol BW, Herbison P. Measuring outcomes in fertility trials: can we rely on clinical pregnancy rates? *Fertil Steril* 2010;94:1647-51.
54. Altman D, Bland J. Treatment allocation by minimisation. *BMJ* 2005;330:843.
55. Mills E, Chan A, Wu P, Vail A, Guyatt G, Altman D. Design, analysis, and presentation of crossover trials. *Trials* 2009;10.
56. Piantadosi S. *Clinical Trials: A Methodologic Perspective*. Wiley Series in Probability and Statistics. 2nd ed: John Wiley & Sons, 2013.

For peer review only

## Figure Legends

### Table 1: Clinical Secondary Outcomes

OHSS: Ovarian Hyperstimulation syndrome; hCG: human chorionic gonadotrophin; 8-OHdg: 8-hydroxy- 2'-deoxyguanosine

<sup>a</sup>Reyner L, Horne J. Falling asleep whilst driving: are drivers aware of prior sleepiness? Int J Legal Med 1998;111:120-3

### Figure 1: Participant timeline schematic - first cycle

<sup>a</sup>Placebo, melatonin 2mg twice daily, melatonin 4mg twice daily, melatonin 8mg twice daily

hCG: human chorionic gonadotrophin; 8-OHdg: 8-hydroxy- 2'-deoxyguanosine

Note: Patients who are not pregnant after their first cycle will be offered a second cycle with a different trial medication (Figure 2)

### Figure 2: Participant timeline schematic - second cycle in those not pregnant after their first cycle

<sup>a</sup> For participants who do not become pregnant in their first cycle, each will be offered allocation to the next treatment arm for their second cycle (ie. A will be allocated to B, B to C, C to D and D to A)

ET: embryo transfer; hCG: human chorionic gonadotrophin

1  
2  
3  
4  
5  
6  
7  
8  
9  
10  
11  
12  
13  
14  
15  
16  
17  
18  
19  
20  
21  
22  
23  
24  
25  
26  
27  
28  
29  
30  
31  
32  
33  
34  
35  
36  
37  
38  
39  
40  
41  
42  
43  
44  
45  
46  
47  
48  
49  
50  
51  
52  
53  
54  
55  
56  
57  
58  
59  
60

| Timepoint (days)                                 | Study Period |                         |                 |    |       |           |       |
|--------------------------------------------------|--------------|-------------------------|-----------------|----|-------|-----------|-------|
|                                                  | Enrolment    | Trial medication begins | Post allocation |    |       | Close out |       |
|                                                  | -7           | 0                       | 8-10            | 14 | 19    | 68        | 299   |
| <b>ENROLMENT</b>                                 |              |                         |                 |    |       |           |       |
| Eligibility Screen                               | x            |                         |                 |    |       |           |       |
| Informed Consent                                 | x            |                         |                 |    |       |           |       |
| Allocation                                       | x            |                         |                 |    |       |           |       |
| <b>INTERVENTIONS</b>                             |              |                         |                 |    |       |           |       |
| Trial Medication <sup>a</sup>                    |              | x                       | —————           | x  |       |           |       |
| <b>ASSESSMENTS</b>                               |              |                         |                 |    |       |           |       |
| Baseline blood tests                             | x            |                         |                 |    |       |           |       |
| Blood tests after treatment                      |              |                         |                 | x  |       |           |       |
| Follicular fluid melatonin and 8-OHdg            |              |                         |                 | x  |       |           |       |
| Measurement of follicular and uterine blood flow |              |                         | x               |    |       |           |       |
| Oocyte assessments                               |              |                         |                 | x  |       |           |       |
| Embryo assessments                               |              |                         |                 | x  | ————— | x         |       |
| Sleepiness scores                                |              | x                       | —————           | x  |       |           |       |
| Pregnancy complication rates and outcomes        |              |                         |                 |    |       | x         | ————— |
| Followup hCG                                     |              |                         |                 |    | x     | —————     | x     |

Figure 1: Participant timeline schematic - first cycle

<sup>a</sup> Placebo, melatonin 2mg twice daily, melatonin 4mg twice daily, melatonin 8mg twice daily

hCG: human chorionic gonadotrophin; 8-OHdg: 8-hydroxy- 2'-deoxyguanosine

Note: Patients who are not pregnant after their first cycle will be offered a second cycle with a different trial medication (Figure 2)

296x419mm (300 x 300 DPI)

1  
2  
3  
4  
5  
6  
7  
8  
9  
10  
11  
12  
13  
14  
15  
16  
17  
18  
19  
20  
21  
22  
23  
24  
25  
26  
27  
28  
29  
30  
31  
32  
33  
34  
35  
36  
37  
38  
39  
40  
41  
42  
43  
44  
45  
46  
47  
48  
49  
50  
51  
52  
53  
54  
55  
56  
57  
58  
59  
60

| Timepoint (days)                          | Study Period                      |                                             |                   |    |       |           |       |   |
|-------------------------------------------|-----------------------------------|---------------------------------------------|-------------------|----|-------|-----------|-------|---|
|                                           | Confirmation of pregnancy failure | Second trial medication begins <sup>a</sup> | Post reallocation |    |       | Close out |       |   |
|                                           |                                   | 0                                           | 8-10              | 14 | 19    | 68        | 299   |   |
| <b>INTERVENTIONS</b>                      |                                   |                                             |                   |    |       |           |       |   |
| Offer reallocation                        | x                                 |                                             |                   |    |       |           |       |   |
| Trial Medication <sup>a</sup>             |                                   | x                                           | -----             | x  |       |           |       |   |
| <b>ASSESSMENTS</b>                        |                                   |                                             |                   |    |       |           |       |   |
| Oocyte assessments                        |                                   |                                             |                   | x  |       |           |       |   |
| Embryo assessments                        |                                   |                                             |                   | x  | ----- | x         |       |   |
| Sleepiness scores                         |                                   | x                                           | -----             | x  |       |           |       |   |
| Pregnancy complication rates and outcomes |                                   |                                             |                   |    |       | x         | ----- | x |
| Followup hCG                              |                                   |                                             |                   |    | x     | -----     | x     |   |

Figure 2: Participant timeline schematic - second cycle in those not pregnant after their first cycle  
<sup>a</sup> For participants who do not become pregnant in their first cycle, each will be offered allocation to the next treatment arm for their second cycle (ie. A will be allocated to B, B to C, C to D and D to A)  
 ET: embryo transfer; hCG: human chorionic gonadotrophin  
 296x419mm (300 x 300 DPI)

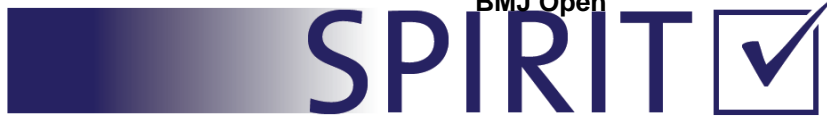

STANDARD PROTOCOL ITEMS: RECOMMENDATIONS FOR INTERVENTIONAL TRIALS

SPIRIT 2013 Checklist: Recommended items to address in a clinical trial protocol and related documents\*

| Page(s)                                                   | Section/item               | ItemNo | Description                                                                                                                                                                                                                                                                              |
|-----------------------------------------------------------|----------------------------|--------|------------------------------------------------------------------------------------------------------------------------------------------------------------------------------------------------------------------------------------------------------------------------------------------|
| <b>Administrative information</b>                         |                            |        |                                                                                                                                                                                                                                                                                          |
| 1                                                         | Title                      | 1      | Descriptive title identifying the study design, population, interventions, and, if applicable, trial acronym                                                                                                                                                                             |
| 3                                                         | Trial registration         | 2a     | Trial identifier and registry name. If not yet registered, name of intended registry                                                                                                                                                                                                     |
| 3                                                         |                            | 2b     | All items from the World Health Organization Trial Registration Data Set                                                                                                                                                                                                                 |
| 3                                                         | Protocol version           | 3      | Date and version identifier                                                                                                                                                                                                                                                              |
| 13                                                        | Funding                    | 4      | Sources and types of financial, material, and other support                                                                                                                                                                                                                              |
| 1,2,13                                                    | Roles and responsibilities | 5a     | Names, affiliations, and roles of protocol contributors                                                                                                                                                                                                                                  |
| 2                                                         |                            | 5b     | Name and contact information for the trial sponsor                                                                                                                                                                                                                                       |
| 13                                                        |                            | 5c     | Role of study sponsor and funders, if any, in study design; collection, management, analysis, and interpretation of data; writing of the report; and the decision to submit the report for publication, including whether they will have ultimate authority over any of these activities |
| 11                                                        |                            | 5d     | Composition, roles, and responsibilities of the coordinating centre, steering committee, endpoint adjudication committee, data management team, and other individuals or groups overseeing the trial, if applicable (see Item 21a for data monitoring committee)                         |
| <b>Introduction</b>                                       |                            |        |                                                                                                                                                                                                                                                                                          |
| 5-7                                                       | Background and rationale   | 6a     | Description of research question and justification for undertaking the trial, including summary of relevant studies (published and unpublished) examining benefits and harms for each intervention                                                                                       |
| 5-7                                                       |                            | 6b     | Explanation for choice of comparators                                                                                                                                                                                                                                                    |
| 7                                                         | Objectives                 | 7      | Specific objectives or hypotheses                                                                                                                                                                                                                                                        |
| 7-11                                                      | Trial design               | 8      | Description of trial design including type of trial (eg, parallel group, crossover, factorial, single group), allocation ratio, and framework (eg, superiority, equivalence, noninferiority, exploratory)                                                                                |
| <b>Methods: Participants, interventions, and outcomes</b> |                            |        |                                                                                                                                                                                                                                                                                          |
| 7                                                         | Study setting              | 9      | Description of study settings (eg, community clinic, academic hospital) and list of countries where data will be collected. Reference to where list of study sites can be obtained                                                                                                       |

|    |           |                                  |     |                                                                                                                                                                                                                                                                                                                                                                                |
|----|-----------|----------------------------------|-----|--------------------------------------------------------------------------------------------------------------------------------------------------------------------------------------------------------------------------------------------------------------------------------------------------------------------------------------------------------------------------------|
| 1  | 8-9       | Eligibility criteria             | 10  | Inclusion and exclusion criteria for participants. If applicable, eligibility criteria for study centres and individuals who will perform the interventions (eg, surgeons, psychotherapists)                                                                                                                                                                                   |
| 2  |           |                                  |     |                                                                                                                                                                                                                                                                                                                                                                                |
| 3  |           |                                  |     |                                                                                                                                                                                                                                                                                                                                                                                |
| 4  | 7-8       | Interventions                    | 11a | Interventions for each group with sufficient detail to allow replication, including how and when they will be administered                                                                                                                                                                                                                                                     |
| 5  |           |                                  |     |                                                                                                                                                                                                                                                                                                                                                                                |
| 6  |           |                                  |     |                                                                                                                                                                                                                                                                                                                                                                                |
| 7  |           |                                  |     |                                                                                                                                                                                                                                                                                                                                                                                |
| 8  | 11        |                                  | 11b | Criteria for discontinuing or modifying allocated interventions for a given trial participant (eg, drug dose change in response to harms, participant request, or improving/worsening disease)                                                                                                                                                                                 |
| 9  |           |                                  |     |                                                                                                                                                                                                                                                                                                                                                                                |
| 10 |           |                                  |     |                                                                                                                                                                                                                                                                                                                                                                                |
| 11 |           |                                  |     |                                                                                                                                                                                                                                                                                                                                                                                |
| 12 | 10        |                                  | 11c | Strategies to improve adherence to intervention protocols, and any procedures for monitoring adherence (eg, drug tablet return, laboratory tests)                                                                                                                                                                                                                              |
| 13 |           |                                  |     |                                                                                                                                                                                                                                                                                                                                                                                |
| 14 |           |                                  |     |                                                                                                                                                                                                                                                                                                                                                                                |
| 15 |           |                                  |     |                                                                                                                                                                                                                                                                                                                                                                                |
| 16 | 9         |                                  | 11d | Relevant concomitant care and interventions that are permitted or prohibited during the trial                                                                                                                                                                                                                                                                                  |
| 17 |           |                                  |     |                                                                                                                                                                                                                                                                                                                                                                                |
| 18 |           |                                  |     |                                                                                                                                                                                                                                                                                                                                                                                |
| 19 | 8, Table  | Outcomes                         | 12  | Primary, secondary, and other outcomes, including the specific measurement variable (eg, systolic blood pressure), analysis metric (eg, change from baseline, final value, time to event), method of aggregation (eg, median, proportion), and time point for each outcome. Explanation of the clinical relevance of chosen efficacy and harm outcomes is strongly recommended |
| 20 |           |                                  |     |                                                                                                                                                                                                                                                                                                                                                                                |
| 21 | 1         |                                  |     |                                                                                                                                                                                                                                                                                                                                                                                |
| 22 |           |                                  |     |                                                                                                                                                                                                                                                                                                                                                                                |
| 23 |           |                                  |     |                                                                                                                                                                                                                                                                                                                                                                                |
| 24 |           |                                  |     |                                                                                                                                                                                                                                                                                                                                                                                |
| 25 |           |                                  |     |                                                                                                                                                                                                                                                                                                                                                                                |
| 26 | Fig 1 and | Participant timeline             | 13  | Time schedule of enrolment, interventions (including any run-ins and washouts), assessments, and visits for participants. A schematic diagram is highly recommended (see Figure)                                                                                                                                                                                               |
| 27 |           |                                  |     |                                                                                                                                                                                                                                                                                                                                                                                |
| 28 | 2         |                                  |     |                                                                                                                                                                                                                                                                                                                                                                                |
| 29 |           |                                  |     |                                                                                                                                                                                                                                                                                                                                                                                |
| 30 |           |                                  |     |                                                                                                                                                                                                                                                                                                                                                                                |
| 31 | 8         | Sample size                      | 14  | Estimated number of participants needed to achieve study objectives and how it was determined, including clinical and statistical assumptions supporting any sample size calculations                                                                                                                                                                                          |
| 32 |           |                                  |     |                                                                                                                                                                                                                                                                                                                                                                                |
| 33 |           |                                  |     |                                                                                                                                                                                                                                                                                                                                                                                |
| 34 |           |                                  |     |                                                                                                                                                                                                                                                                                                                                                                                |
| 35 | 9-10      | Recruitment                      | 15  | Strategies for achieving adequate participant enrolment to reach target sample size                                                                                                                                                                                                                                                                                            |
| 36 |           |                                  |     |                                                                                                                                                                                                                                                                                                                                                                                |
| 37 |           |                                  |     |                                                                                                                                                                                                                                                                                                                                                                                |
| 38 |           |                                  |     |                                                                                                                                                                                                                                                                                                                                                                                |
| 39 |           |                                  |     |                                                                                                                                                                                                                                                                                                                                                                                |
| 40 |           |                                  |     |                                                                                                                                                                                                                                                                                                                                                                                |
| 41 |           |                                  |     |                                                                                                                                                                                                                                                                                                                                                                                |
| 42 |           |                                  |     |                                                                                                                                                                                                                                                                                                                                                                                |
| 43 | 10        | Sequence generation              | 16a | Method of generating the allocation sequence (eg, computer-generated random numbers), and list of any factors for stratification. To reduce predictability of a random sequence, details of any planned restriction (eg, blocking) should be provided in a separate document that is unavailable to those who enrol participants or assign interventions                       |
| 44 |           |                                  |     |                                                                                                                                                                                                                                                                                                                                                                                |
| 45 |           |                                  |     |                                                                                                                                                                                                                                                                                                                                                                                |
| 46 |           |                                  |     |                                                                                                                                                                                                                                                                                                                                                                                |
| 47 |           |                                  |     |                                                                                                                                                                                                                                                                                                                                                                                |
| 48 |           |                                  |     |                                                                                                                                                                                                                                                                                                                                                                                |
| 49 |           |                                  |     |                                                                                                                                                                                                                                                                                                                                                                                |
| 50 | 10        | Allocation concealment mechanism | 16b | Mechanism of implementing the allocation sequence (eg, central telephone; sequentially numbered, opaque, sealed envelopes), describing any steps to conceal the sequence until interventions are assigned                                                                                                                                                                      |
| 51 |           |                                  |     |                                                                                                                                                                                                                                                                                                                                                                                |
| 52 |           |                                  |     |                                                                                                                                                                                                                                                                                                                                                                                |
| 53 |           |                                  |     |                                                                                                                                                                                                                                                                                                                                                                                |
| 54 | 10        | Implementation                   | 16c | Who will generate the allocation sequence, who will enrol participants, and who will assign participants to interventions                                                                                                                                                                                                                                                      |
| 55 |           |                                  |     |                                                                                                                                                                                                                                                                                                                                                                                |
| 56 |           |                                  |     |                                                                                                                                                                                                                                                                                                                                                                                |
| 57 |           |                                  |     |                                                                                                                                                                                                                                                                                                                                                                                |
| 58 | 10        | Blinding (masking)               | 17a | Who will be blinded after assignment to interventions (eg, trial participants, care providers, outcome assessors, data analysts), and how                                                                                                                                                                                                                                      |
| 59 |           |                                  |     |                                                                                                                                                                                                                                                                                                                                                                                |
| 60 |           |                                  |     |                                                                                                                                                                                                                                                                                                                                                                                |
|    | 10        |                                  | 17b | If blinded, circumstances under which unblinding is permissible, and procedure for revealing a participant's allocated intervention during the trial                                                                                                                                                                                                                           |



**Methods: Data collection, management, and analysis**

|    |    |                         |     |                                                                                                                                                                                                                                                                                                                                                                                                              |
|----|----|-------------------------|-----|--------------------------------------------------------------------------------------------------------------------------------------------------------------------------------------------------------------------------------------------------------------------------------------------------------------------------------------------------------------------------------------------------------------|
| 1  |    |                         |     |                                                                                                                                                                                                                                                                                                                                                                                                              |
| 2  | 12 | Data collection methods | 18a | Plans for assessment and collection of outcome, baseline, and other trial data, including any related processes to promote data quality (eg, duplicate measurements, training of assessors) and a description of study instruments (eg, questionnaires, laboratory tests) along with their reliability and validity, if known. Reference to where data collection forms can be found, if not in the protocol |
| 3  |    |                         |     |                                                                                                                                                                                                                                                                                                                                                                                                              |
| 4  |    |                         |     |                                                                                                                                                                                                                                                                                                                                                                                                              |
| 5  |    |                         |     |                                                                                                                                                                                                                                                                                                                                                                                                              |
| 6  |    |                         |     |                                                                                                                                                                                                                                                                                                                                                                                                              |
| 7  |    |                         |     |                                                                                                                                                                                                                                                                                                                                                                                                              |
| 8  |    |                         |     |                                                                                                                                                                                                                                                                                                                                                                                                              |
| 9  |    |                         |     |                                                                                                                                                                                                                                                                                                                                                                                                              |
| 10 |    |                         |     |                                                                                                                                                                                                                                                                                                                                                                                                              |
| 11 | 10 |                         | 18b | Plans to promote participant retention and complete follow-up, including list of any outcome data to be collected for participants who discontinue or deviate from intervention protocols                                                                                                                                                                                                                    |
| 12 |    |                         |     |                                                                                                                                                                                                                                                                                                                                                                                                              |
| 13 |    |                         |     |                                                                                                                                                                                                                                                                                                                                                                                                              |
| 14 |    |                         |     |                                                                                                                                                                                                                                                                                                                                                                                                              |
| 15 | 12 | Data management         | 19  | Plans for data entry, coding, security, and storage, including any related processes to promote data quality (eg, double data entry; range checks for data values). Reference to where details of data management procedures can be found, if not in the protocol                                                                                                                                            |
| 16 |    |                         |     |                                                                                                                                                                                                                                                                                                                                                                                                              |
| 17 |    |                         |     |                                                                                                                                                                                                                                                                                                                                                                                                              |
| 18 |    |                         |     |                                                                                                                                                                                                                                                                                                                                                                                                              |
| 19 |    |                         |     |                                                                                                                                                                                                                                                                                                                                                                                                              |
| 20 |    |                         |     |                                                                                                                                                                                                                                                                                                                                                                                                              |
| 21 | 11 | Statistical methods     | 20a | Statistical methods for analysing primary and secondary outcomes. Reference to where other details of the statistical analysis plan can be found, if not in the protocol                                                                                                                                                                                                                                     |
| 22 |    |                         |     |                                                                                                                                                                                                                                                                                                                                                                                                              |
| 23 |    |                         |     |                                                                                                                                                                                                                                                                                                                                                                                                              |
| 24 |    |                         |     |                                                                                                                                                                                                                                                                                                                                                                                                              |
| 25 |    |                         |     |                                                                                                                                                                                                                                                                                                                                                                                                              |
| 26 | 11 |                         | 20b | Methods for any additional analyses (eg, subgroup and adjusted analyses)                                                                                                                                                                                                                                                                                                                                     |
| 27 |    |                         |     |                                                                                                                                                                                                                                                                                                                                                                                                              |
| 28 | 11 |                         | 20c | Definition of analysis population relating to protocol non-adherence (eg, as randomised analysis), and any statistical methods to handle missing data (eg, multiple imputation)                                                                                                                                                                                                                              |
| 29 |    |                         |     |                                                                                                                                                                                                                                                                                                                                                                                                              |
| 30 |    |                         |     |                                                                                                                                                                                                                                                                                                                                                                                                              |
| 31 |    |                         |     |                                                                                                                                                                                                                                                                                                                                                                                                              |

**Methods: Monitoring**

|    |    |                          |     |                                                                                                                                                                                                                                                                                                                                       |
|----|----|--------------------------|-----|---------------------------------------------------------------------------------------------------------------------------------------------------------------------------------------------------------------------------------------------------------------------------------------------------------------------------------------|
| 32 |    |                          |     |                                                                                                                                                                                                                                                                                                                                       |
| 33 |    |                          |     |                                                                                                                                                                                                                                                                                                                                       |
| 34 | 11 | Data monitoring          | 21a | Composition of data monitoring committee (DMC); summary of its role and reporting structure; statement of whether it is independent from the sponsor and competing interests; and reference to where further details about its charter can be found, if not in the protocol. Alternatively, an explanation of why a DMC is not needed |
| 35 |    |                          |     |                                                                                                                                                                                                                                                                                                                                       |
| 36 |    |                          |     |                                                                                                                                                                                                                                                                                                                                       |
| 37 |    |                          |     |                                                                                                                                                                                                                                                                                                                                       |
| 38 |    |                          |     |                                                                                                                                                                                                                                                                                                                                       |
| 39 |    |                          |     |                                                                                                                                                                                                                                                                                                                                       |
| 40 |    |                          |     |                                                                                                                                                                                                                                                                                                                                       |
| 41 | 11 |                          | 21b | Description of any interim analyses and stopping guidelines, including who will have access to these interim results and make the final decision to terminate the trial                                                                                                                                                               |
| 42 |    |                          |     |                                                                                                                                                                                                                                                                                                                                       |
| 43 |    |                          |     |                                                                                                                                                                                                                                                                                                                                       |
| 44 |    |                          |     |                                                                                                                                                                                                                                                                                                                                       |
| 45 |    |                          |     |                                                                                                                                                                                                                                                                                                                                       |
| 46 | 11 | Harms                    | 22  | Plans for collecting, assessing, reporting, and managing solicited and spontaneously reported adverse events and other unintended effects of trial interventions or trial conduct                                                                                                                                                     |
| 47 |    |                          |     |                                                                                                                                                                                                                                                                                                                                       |
| 48 |    |                          |     |                                                                                                                                                                                                                                                                                                                                       |
| 49 |    |                          |     |                                                                                                                                                                                                                                                                                                                                       |
| 50 |    |                          |     |                                                                                                                                                                                                                                                                                                                                       |
| 51 | 11 | Auditing                 | 23  | Frequency and procedures for auditing trial conduct, if any, and whether the process will be independent from investigators and the sponsor                                                                                                                                                                                           |
| 52 |    |                          |     |                                                                                                                                                                                                                                                                                                                                       |
| 53 |    |                          |     |                                                                                                                                                                                                                                                                                                                                       |
| 54 |    |                          |     |                                                                                                                                                                                                                                                                                                                                       |
| 55 |    |                          |     |                                                                                                                                                                                                                                                                                                                                       |
| 56 | 12 | Research ethics approval | 24  | Plans for seeking research ethics committee/institutional review board (REC/IRB) approval                                                                                                                                                                                                                                             |
| 57 |    |                          |     |                                                                                                                                                                                                                                                                                                                                       |
| 58 |    |                          |     |                                                                                                                                                                                                                                                                                                                                       |
| 59 | 11 | Protocol amendments      | 25  | Plans for communicating important protocol modifications (eg, changes to eligibility criteria, outcomes, analyses) to relevant parties (eg, investigators, REC/IRBs, trial participants, trial registries, journals, regulators)                                                                                                      |
| 60 |    |                          |     |                                                                                                                                                                                                                                                                                                                                       |

|    |           |                               |     |                                                                                                                                                                                                                                                                                     |
|----|-----------|-------------------------------|-----|-------------------------------------------------------------------------------------------------------------------------------------------------------------------------------------------------------------------------------------------------------------------------------------|
| 1  | 10        | Consent or assent             | 26a | Who will obtain informed consent or assent from potential trial participants or authorised surrogates, and how (see Item 32)                                                                                                                                                        |
| 2  |           |                               |     |                                                                                                                                                                                                                                                                                     |
| 3  | N/A       |                               | 26b | Additional consent provisions for collection and use of participant data and biological specimens in ancillary studies, if applicable                                                                                                                                               |
| 4  |           |                               |     |                                                                                                                                                                                                                                                                                     |
| 5  |           |                               |     |                                                                                                                                                                                                                                                                                     |
| 6  | 12        | Confidentiality               | 27  | How personal information about potential and enrolled participants will be collected, shared, and maintained in order to protect confidentiality before, during, and after the trial                                                                                                |
| 7  |           |                               |     |                                                                                                                                                                                                                                                                                     |
| 8  |           |                               |     |                                                                                                                                                                                                                                                                                     |
| 9  |           |                               |     |                                                                                                                                                                                                                                                                                     |
| 10 |           |                               |     |                                                                                                                                                                                                                                                                                     |
| 11 | 13        | Declaration of interests      | 28  | Financial and other competing interests for principal investigators for the overall trial and each study site                                                                                                                                                                       |
| 12 |           |                               |     |                                                                                                                                                                                                                                                                                     |
| 13 |           |                               |     |                                                                                                                                                                                                                                                                                     |
| 14 | 12        | Access to data                | 29  | Statement of who will have access to the final trial dataset, and disclosure of contractual agreements that limit such access for investigators                                                                                                                                     |
| 15 |           |                               |     |                                                                                                                                                                                                                                                                                     |
| 16 |           |                               |     |                                                                                                                                                                                                                                                                                     |
| 17 |           |                               |     |                                                                                                                                                                                                                                                                                     |
| 18 | 11        | Ancillary and post-trial care | 30  | Provisions, if any, for ancillary and post-trial care, and for compensation to those who suffer harm from trial participation                                                                                                                                                       |
| 19 |           |                               |     |                                                                                                                                                                                                                                                                                     |
| 20 |           |                               |     |                                                                                                                                                                                                                                                                                     |
| 21 | 12        | Dissemination policy          | 31a | Plans for investigators and sponsor to communicate trial results to participants, healthcare professionals, the public, and other relevant groups (eg, via publication, reporting in results databases, or other data sharing arrangements), including any publication restrictions |
| 22 |           |                               |     |                                                                                                                                                                                                                                                                                     |
| 23 |           |                               |     |                                                                                                                                                                                                                                                                                     |
| 24 |           |                               |     |                                                                                                                                                                                                                                                                                     |
| 25 |           |                               |     |                                                                                                                                                                                                                                                                                     |
| 26 |           |                               |     |                                                                                                                                                                                                                                                                                     |
| 27 | 12        |                               | 31b | Authorship eligibility guidelines and any intended use of professional writers                                                                                                                                                                                                      |
| 28 |           |                               |     |                                                                                                                                                                                                                                                                                     |
| 29 | 12        |                               | 31c | Plans, if any, for granting public access to the full protocol, participant-level dataset, and statistical code                                                                                                                                                                     |
| 30 |           |                               |     |                                                                                                                                                                                                                                                                                     |
| 31 |           |                               |     |                                                                                                                                                                                                                                                                                     |
| 32 |           |                               |     |                                                                                                                                                                                                                                                                                     |
| 33 |           | <b>Appendices</b>             |     |                                                                                                                                                                                                                                                                                     |
| 34 | Available | Informed consent materials    | 32  | Model consent form and other related documentation given to participants and authorised surrogates                                                                                                                                                                                  |
| 35 | on        |                               |     |                                                                                                                                                                                                                                                                                     |
| 36 | request   |                               |     |                                                                                                                                                                                                                                                                                     |
| 37 |           |                               |     |                                                                                                                                                                                                                                                                                     |
| 38 |           |                               |     |                                                                                                                                                                                                                                                                                     |
| 39 | 12        | Biological specimens          | 33  | Plans for collection, laboratory evaluation, and storage of biological specimens for genetic or molecular analysis in the current trial and for future use in ancillary studies, if applicable                                                                                      |
| 40 |           |                               |     |                                                                                                                                                                                                                                                                                     |
| 41 |           |                               |     |                                                                                                                                                                                                                                                                                     |
| 42 |           |                               |     |                                                                                                                                                                                                                                                                                     |

\*It is strongly recommended that this checklist be read in conjunction with the SPIRIT 2013 Explanation & Elaboration for important clarification on the items. Amendments to the protocol should be tracked and dated. The SPIRIT checklist is copyrighted by the SPIRIT Group under the Creative Commons "[Attribution-NonCommercial-NoDerivs 3.0 Unported](https://creativecommons.org/licenses/by-nc-nd/3.0/)" license.

43  
44  
45  
46  
47  
48  
49  
50  
51  
52  
53  
54  
55  
56  
57  
58  
59  
60

# BMJ Open

## A pilot double-blind randomised placebo-controlled dose-response trial assessing the effects of melatonin on infertility treatment (MIART): study protocol

|                                 |                                                                                                                                                                                                                                                                                                                                                                                                                                                                                                 |
|---------------------------------|-------------------------------------------------------------------------------------------------------------------------------------------------------------------------------------------------------------------------------------------------------------------------------------------------------------------------------------------------------------------------------------------------------------------------------------------------------------------------------------------------|
| Journal:                        | <i>BMJ Open</i>                                                                                                                                                                                                                                                                                                                                                                                                                                                                                 |
| Manuscript ID:                  | bmjopen-2014-005986.R2                                                                                                                                                                                                                                                                                                                                                                                                                                                                          |
| Article Type:                   | Protocol                                                                                                                                                                                                                                                                                                                                                                                                                                                                                        |
| Date Submitted by the Author:   | 05-Aug-2014                                                                                                                                                                                                                                                                                                                                                                                                                                                                                     |
| Complete List of Authors:       | Fernando, Shavi; Monash University, Department of Obstetrics and Gynaecology<br>Osianlis, Tiki; Monash University, Department of Obstetrics and Gynaecology<br>Vollenhoven, Beverley; Monash University, Department of Obstetrics and Gynaecology<br>Wallace, Euan; Monash University, Department of Obstetrics and Gynaecology; MIMR-PHI, Institute of Medical Research<br>Rombauts, Luk; Monash University, Department of Obstetrics and Gynaecology; MIMR-PHI, Institute of Medical Research |
| <b>Primary Subject Heading</b>: | Obstetrics and gynaecology                                                                                                                                                                                                                                                                                                                                                                                                                                                                      |
| Secondary Subject Heading:      | Reproductive medicine                                                                                                                                                                                                                                                                                                                                                                                                                                                                           |
| Keywords:                       | Reproductive medicine < GYNAECOLOGY, Subfertility < GYNAECOLOGY, Sex steroids & HRT < DIABETES & ENDOCRINOLOGY                                                                                                                                                                                                                                                                                                                                                                                  |
|                                 |                                                                                                                                                                                                                                                                                                                                                                                                                                                                                                 |

SCHOLARONE™  
Manuscripts

1  
2  
3  
4  
5  
6  
7  
8  
9  
10  
11  
12  
13  
14  
15  
16  
17  
18  
19  
20  
21  
22  
23  
24  
25  
26  
27  
28  
29  
30  
31  
32  
33  
34  
35  
36  
37  
38  
39  
40  
41  
42  
43  
44  
45  
46  
47  
48  
49  
50  
51  
52  
53  
54  
55  
56  
57  
58  
59  
60

# A pilot double-blind randomised placebo-controlled dose-response trial assessing the effects of melatonin on infertility treatment (MIART): study protocol

## Corresponding Author:

Dr Shavi Fernando

shavif@hotmail.com

## Authors:

Dr Shavi Fernando

MBBS(hon) BMedSc(hon)

MIMR-PHI Institute of Medical Research 246 Clayton rd, Clayton Victoria Australia 3168

Department of Obstetrics and Gynaecology, Monash University, Clayton, Victoria Australia

Level 5, Monash Medical Centre, Clayton rd, Clayton, Victoria Australia 3168

Dr Tiki Osianlis

BSc(hon) PhD

Department of Obstetrics and Gynaecology, Monash University, Clayton, Victoria Australia

Monash IVF, 252 Clayton Rd, Clayton, Victoria Australia 3168

A/Prof Beverley Vollenhoven

MD PhD FRANZCOG CREI

Department of Obstetrics and Gynaecology, Monash University, Clayton Australia

Level 5, Monash Medical Centre, Clayton rd, Clayton, Victoria Australia 3168

Prof Euan Wallace

MBChB MD FRCOG FRANZCOG

MIMR-PHI Institute of Medical Research 246 Clayton rd, Clayton Victoria Australia 3168

1 Department of Obstetrics and Gynaecology, Monash University, Clayton, Australia

2  
3 Level 5, Monash Medical Centre, Clayton rd, Clayton, Victoria Australia 3168

4  
5  
6  
7 A/Prof Luk Rombauts

8  
9 MD PhD FRANZCOG CREI

10 MIMR-PHI Institute of Medical Research 246 Clayton rd, Clayton Victoria Australia 3168

11  
12 Department of Obstetrics and Gynaecology, Monash University, Clayton, Victoria Australia

13  
14  
15 Monash IVF, 252 Clayton Rd, Clayton, Victoria Australia 3168

16  
17  
18  
19  
20 **Trial Sponsor:**

21 The Ritchie Centre, Monash Medical Centre, Clayton rd, Clayton VIC AUS 3168

22  
23 03 95946666

24  
25  
26  
27  
28 **Running Title:** Melatonin in ART - MIART randomised trial: study protocol

29  
30  
31  
32 **Keywords:**

33 Melatonin, assisted reproductive technology (ART), in-vitro fertilization, oxidative stress, protocol

34  
35  
36  
37  
38 **Word Count:** 2796

## Abstract

### Introduction

High levels of oxidative stress can have considerable impact on the outcomes of in-vitro fertilization (IVF). Recent studies have reported that melatonin, a neurohormone secreted from the pineal gland in response to darkness, has significant anti-oxidative capabilities which may protect against the oxidative stress of infertility treatment on gametes and embryos. Early studies of oral melatonin (3-4mg/day) in IVF have suggested favourable outcomes. However, most trials were poorly designed and none have addressed the optimum dose of melatonin. We present a proposal for a pilot double-blind randomised placebo-controlled dose-response trial aimed to determine whether oral melatonin supplementation during ovarian stimulation can improve the outcomes of assisted reproductive technology.

### Methods and analyses

We will recruit 160 infertile women into one of four groups: placebo (n=40); melatonin 2mg twice per day (n=40); melatonin 4mg twice per day (n=40) and melatonin 8mg twice per day (n=40). The primary outcome will be clinical pregnancy rate. Secondary clinical outcomes include oocyte number/quality, embryo number/quality and fertilization rate. We will also measure serum melatonin and the oxidative stress marker, 8-hydroxy- 2'-deoxyguanosine (8-OHdg) at baseline and after treatment and levels of these in follicular fluid at egg pick-up. We will investigate follicular blood flow with Doppler ultrasound, patient sleepiness scores, and pregnancy complications, comparing outcomes between groups. This protocol has been designed in accordance with the SPIRIT 2013 Guidelines.

### Ethics and dissemination:

Ethical approval has been obtained from Monash Health HREC (Ref: 13402B), Monash University HREC (Ref: CF14/523 – 2014000181) and Monash Surgical Private Hospital HREC (Ref: 14107). Data analysis, interpretation and conclusions will be presented at national and international conferences and published in peer-reviewed journals.

**Registration Details:** Version 1. Australian New Zealand Clinical Trials Registry, ACTRN: ACTRN12613001317785. The complete WHO Registration Data Set, as described by the SPIRIT 2013 guidelines is available for viewing at <https://www.anzctr.org.au/Trial/Registration/TrialReview.aspx?id=365376>

**Strengths and limitations**

- This trial is a well-designed pilot study to achieve biochemically and clinically relevant outcomes.
- Significant preliminary research has been performed in order to appropriately design the study to fill gaps in current knowledge.
- This is the first randomised placebo controlled dose-finding trial of melatonin in the field of infertility world-wide and if successful, has the potential to provide a foundation for future large randomised controlled trials.
- A cross-over design will be used as this is known to improve recruitment rates

## Introduction

Humans are aerobic organisms and when oxygen is utilised in metabolic processes, free oxygen radicals are created as a consequence. These radicals are oxidants and contain 'free' valence electrons, making them highly unstable and therefore reactive, capable of causing injury to cells. This occurs by accepting electrons from another molecule (a reductant) in order to reach stability. In doing so, the chemical structure of the reductant is changed, and may no longer be able to perform its designated function. In fact, often the reductant can then produce or sometimes even become an oxidant having the potential to cause oxidative stress in its own right.<sup>1</sup> Anti-oxidative agents are present endogenously and can also be administered exogenously. They are designed to reduce free radicals by donating electrons to stabilise the free radical.<sup>2</sup> The term 'reactive oxygen species' (ROS), not only includes free radicals but also molecularly stable non-radical molecules which contain oxygen and are capable of causing oxidative stress, such as hydrogen peroxide (H<sub>2</sub>O<sub>2</sub>).<sup>3</sup> While ROS are necessary for essential physiological processes, an overabundance can result in cellular and tissue damage and this is commonly referred to as 'oxidative stress'.<sup>4</sup> Oxidative stress can be measured in bodily fluids by markers including 8-hydroxy- 2'-deoxyguanosine (8-Ohdg).<sup>5</sup>

Over recent years, the potential role of oxidative stress in the outcomes of assisted reproductive technology (ART) has been gaining increasing attention, in particular with regards to in-vitro fertilization (IVF) and intracytoplasmic sperm injection (ICSI). This is perhaps not surprising given that ART exposes both oocytes and embryos to high levels of superoxide free radicals during gamete and embryo culture<sup>6</sup>. Indeed, in addition to the culture conditions, *in vitro* the oocytes are not afforded the normal protection of the antioxidant-rich follicular fluid or surrounding cumulus cells, leaving them more susceptible to oxidative damage.<sup>7,8</sup> Reproductive processes such as chromosome segregation (resulting in euploid oocytes), polar body extrusion (necessary for haploid oocytes), fertilization and early cleavage (to avoid arrested embryos) require energy. As the average age of women seeking fertility treatment rises, the level of ROS and subsequent oxidative stress increases, resulting in mitochondrial DNA mutations which in turn affect ATP production in the oocyte. Without the necessary ATP, required cellular processes cannot occur correctly, having a direct effect on the quality of the oocyte, embryo and the final outcome of the IVF procedure.<sup>9,10</sup>

It has been shown that oocyte quality begins to deteriorate immediately following ovulation. This has been thought to be an inflammatory driven oxidative stress process<sup>11</sup> whereby the production of cytokines and proteases is associated with an increase in ROS which in turn impair oocyte maturation.<sup>12-14</sup> Evidence of oxidative damage in *in vitro* oocytes has been shown to exist as early as 8 hours after ovulation.<sup>15</sup> Nor surprisingly it has been shown that high levels of the oxidative stress in the follicular fluid of infertile women are associated with poor oocyte maturation and embryo quality, and that inducers of oxidative stress can be used to inhibit oocyte maturation.<sup>5,12</sup>



1  
2 Together, these observations highlighting the importance of oxidative stress in the developing  
3 follicle and in the future success of fertilization, whether *in vivo* or *in vitro*.  
4

5 Recently, it has been shown that melatonin, a neurohormone secreted from the pineal gland, has  
6 important oxygen-scavenging properties which naturally mitigate oxidative stress by both  
7 neutralising ROS in human tissues and by inducing endogenous anti-oxidant enzymes.<sup>16-18</sup>

8 Melatonin has been shown to be beneficial as an adjuvant therapy in the management of many  
9 medical conditions in which oxidative stress has been implicated including diabetes, glaucoma,  
10 irritable bowel syndrome and fertility.<sup>19-22</sup>  
11

12 The effects of melatonin supplementation on culture media,<sup>12, 21, 23-27</sup> gametes,<sup>5, 15, 28</sup> embryos<sup>15,</sup>  
13 <sup>29, 30</sup> and luteal function<sup>31-35</sup> have been identified as useful areas for investigation. Human clinical  
14 studies have begun recently, with emphasis on oral supplementation of melatonin during the  
15 stimulation cycle and its effects on oocyte and embryo quality.<sup>12, 36-39</sup>  
16

17 Importantly, melatonin has a remarkably benign safety profile in both animal and human studies.  
18 A mouse study investigating dose-related effects of melatonin on ovarian grafts found that doses  
19 at 200mg/kg/day have immunosuppressant effects, leading to prolongation of graft survival,  
20 however, also resulted in a reduction in healthy follicles. They concluded that doses of greater  
21 than 20mg/kg/day resulted in a reduction in both healthy follicles and ovarian size.<sup>40</sup> The maternal  
22 lowest observed adverse effect level (LOAEL), the lowest level at which an adverse event was  
23 observed, appears to be around 200mg/kg/day, equivalent to over 1g per day for humans.  
24 Furthermore, in rodent studies, no significant adverse effects on either the embryo or fetus have  
25 been reported for up to doses of 200mg/kg/day.<sup>41</sup> There have been several randomised controlled  
26 trials addressing high doses of melatonin in human adults and children,<sup>42-46</sup> and reports have  
27 established that toxicity levels in humans are not reached until a daily dose of at least 5mg/kg.<sup>47</sup>  
28  
29  
30  
31  
32  
33  
34  
35  
36  
37

### 38 Rationale

39 In the USA in 2011, only 1 in 4 of all IVF cycles resulted in clinical pregnancy with less than 1 in 5  
40 cycles resulting in live birth<sup>48</sup>. That is 4 out of 5 IVF cycles do not result in a live baby. Clearly there  
41 is much room for further improvement, if only to meet societal expectations and reduce  
42 healthcare costs. Continued research into novel adjuvant therapies designed to improve IVF  
43 outcomes is therefore merited. Several human and animal studies support the use of melatonin in  
44 the treatment of infertility, with beneficial actions being largely attributed to its anti-oxidant  
45 properties. Furthermore, melatonin receptors are found on granulosa cells, oocytes and  
46 embryos,<sup>49</sup> with intrafollicular melatonin concentrations being significantly higher than those  
47 found in serum, again suggesting a physiological role in reproduction.<sup>39, 67, 68</sup> The human studies  
48 addressing the use of melatonin in infertility treatment undertaken to date have been small and  
49 not placebo-controlled. None have attempted to identify an optimal dose.<sup>36-38, 50</sup> Further,  
50 interpretation of any outcomes have been hampered by the within-patient comparison design,  
51 where patients act as their own controls.<sup>12, 39, 51</sup>  
52  
53  
54  
55  
56  
57  
58  
59  
60

1 We have designed this study to be the first randomised, placebo-controlled, dose-finding clinical  
2 trial to investigate the effect(s), if any, of oral melatonin on the clinical pregnancy rate following  
3 IVF/ICSI treatment.  
4  
5  
6  
7

### 8 **Aims**

9  
10 The overall aim of this trial is to determine whether oral melatonin administration can improve the  
11 outcomes of IVF/ICSI. In order to address this, we will determine whether melatonin  
12 administration has a dose-response effect in women undergoing IVF/ICSI on:  
13  
14

- 15 1. biochemical markers of follicle and oocyte health (melatonin, 8-hydroxy- 2'-  
16 deoxyguanosine (8-OHdg), progesterone, oestradiol)
  - 17 2. sonographic markers of follicle health
  - 18 3. patient sleepiness
  - 19 4. pregnancy rate following IVF/ICSI
- 20  
21  
22  
23  
24  
25  
26  
27

### 28 **Methods and analyses**

29  
30 This protocol has been designed in accordance with the SPIRIT 2013 Guidelines.<sup>52</sup> Recruitment will  
31 commence in July 2014. This will occur over two years. Analysis and dissemination will occur after  
32 this period of time. The study is expected to be completed by February 2017.  
33  
34  
35  
36

### 37 **Study design**

38  
39 Pilot phase II cross-over double-blinded randomised placebo-controlled dose-response trial  
40  
41  
42

### 43 **Subjects**

44  
45 We plan to recruit a total of 160 infertile women undergoing IVF/ICSI.  
46  
47  
48  
49

### 50 **Study setting**

51  
52 Patients will be recruited from Monash IVF infertility clinics in Melbourne, Australia over a period  
53 of 2 years.  
54  
55  
56  
57  
58  
59  
60

## Interventions to be measured

This trial will have four arms. All capsules will be indistinguishable from each other.

1. Placebo capsule taken twice per day
2. 2mg melatonin capsule twice per day (4mg/d total)
3. 4mg melatonin capsule twice per day (8mg/d total)
4. 8mg melatonin capsule twice per day (16mg/d total)

## Primary Outcome

Clinical pregnancy rate,<sup>53</sup> defined as the presence of a live pregnancy in the uterine cavity at a transvaginal ultrasound (TVUS) at 6-8 weeks' gestation.

## Secondary outcomes

See *Table 1* for details.

## Sample Size

As this is a pilot dose-finding study, without precedence on which to base accurate power calculations, a power calculation has not been performed. Part of our aim is to provide clarification allowing for larger randomised trials to be designed in the future. We hypothesise that melatonin will have a positive dose-response effect on clinical pregnancy rates after IVF/ICSI. We have chosen a convenience sample of 160 participants, 40 in each of the four groups, in order to assess plausible morphological, biochemical and sonographic surrogate markers for oocyte quality, as well as to provide an indication of the effect size for each dose for our primary outcome, clinical pregnancy rate. Conservatively estimating that, in total, 50% of patients (n=80) do not get pregnant after their first cycle, we may assume that 60 patients will participate in the crossover arm (allowing for drop-outs) in their second cycle and be allocated to a different treatment group.

## Inclusion criteria

1. Undergoing first cycle of IVF or ICSI
2. Age between 18 and 45

3. Body mass index (BMI) between 18 and 35
4. Undergoing a GnRH antagonist cycle (without OCP scheduling)

#### Exclusion criteria

1. Current untreated pelvic pathology – moderate to severe endometriosis, submucosal uterine fibroids/polyps assessed by the treating specialist to affect fertility, pelvic inflammatory disease, uterine malformations, Asherman's syndrome and hydrosalpinx.
2. Currently enrolled in another interventional clinical trial
3. Concurrent use of other adjuvant therapies (eg. Chinese herbs, acupuncture)
4. Current pregnancy
5. Malignancy or other contraindication to IVF
6. Autoimmune disorders
7. Undergoing preimplantation genetic diagnosis (PGD)
8. Hypersensitivity to melatonin or its metabolites
9. Concurrent use of any of the following medications
  - a. Fluvoxamine (eg. Luvox, Movox, Voxam)
  - b. Cimetidine (eg. Magicul, Tagamet)
  - c. Quinolones and other CYP1A2 inhibitors (Ciprofloxacin, Avalox)
  - d. Carbamazepine (eg. Tegretol), rifampicin (eg. Rifadin) and other CYP1A2 inducers
  - e. Zolpidem (eg. Stilnox), zopiclone (eg. Imovane) and other non-benzodiazepine hypnotics
10. Inability to comply with trial protocol

#### Concomitant care

Aside from trial protocol and inclusion/exclusion criteria listed above, standard concomitant care, such as folic acid supplements, is permitted.

## Participant enrolment

This trial will begin recruitment at the level of the infertility specialist. Once identified as requiring IVF/ICSI, and satisfying inclusion and exclusion criteria, the patient will be provided with detailed written information about the trial protocol. After approximately one week, the patient will be approached and written informed consent will be obtained by the principle investigator at the first visit with the infertility clinic nurse. Baseline blood tests will be taken and basic demographic information including aetiology of infertility will be recorded. The patient will then be randomised by the principle investigator (see below) to one of the study arms and provided with the trial medication. The participant will commence taking the trial medication on the day that ovarian stimulation injections begin (Day 2-3 of menses) at 0800 and 2200 each day, with the last capsule being taken at 2200 the night before oocyte collection.

For a summarised participant timeline, See *Figure 1* and *Figure 2*.

## Allocation concealment, blinding and randomisation

Association of particular treatment effects (e.g. sleepiness) with certain randomisation codes may become apparent during the trial and to prevent further allocation bias proper concealment of treatment allocation is necessary. Each treatment arm will be randomly allocated a letter (A, B, C or D) by way of opaque sealed envelope. Randomisation will be computerised and patients will be randomised at a ratio of 1:1:1:1 to one of the groups, A-D, using the minimisation method, a method of randomisation accounting for factors known to affect the outcome used in small trials to prevent selection bias.<sup>54</sup>

With a crossover design improved patient recruitment is very likely because all non-pregnant participants will be guaranteed at least one cycle with one of the doses of melatonin.<sup>55, 56</sup> After completing the first study cycle, those participants that are not pregnant will be recruited for the cross-over cycle in which they will be assigned the next treatment arm. For example, if a participant were allocated to treatment group A in their first cycle and did not become pregnant, they would be offered allocation to group B in their second cycle and so on. The half life of melatonin is short, being completely eliminated from the body shortly after 24 hours.<sup>57</sup> Once patients have had their first stimulated cycle of treatment, a second stimulated cycle will routinely not commence until at least 4 weeks after the negative pregnancy test (approximately 6 weeks after last melatonin dose), much longer than the elimination time for melatonin. This will be a sufficient washout period prior to inclusion in a second cycle.

Participants will be blinded by receiving identical-appearing unmarked capsules. All trial researchers will be blinded to treatment allocation group until after analyses are performed at the completion of the trial. A Data Safety Monitoring Committee (see *Adverse events* for details) and dispensing pharmacy will be aware of allocation to allow identification of any unbalanced or

1  
2 multiple serious adverse events that may necessitate emergency unblinding of researchers and  
3 participants.  
4

### 7 **Adherence and retention**

8  
9 In order to ensure the integrity of study data, participant adherence to trial protocol will be  
10 assessed on a medication administration record updated daily by the participant. At oocyte  
11 collection, participants will return medication bottles and compliance will be confirmed by  
12 counting remaining tablets. This will be recorded on individual patient compliance forms and  
13 patient record forms. Every reasonable effort will be made from the time of enrolment until the  
14 end of follow-up to maintain contact with and maintain subject participation in the trial.  
15  
16  
17  
18  
19

### 20 **Analysis plan**

21  
22 SPSS v22.0 (IBM, Armonk, New York) will be used for data analysis. Primary analysis will occur by  
23 the intention-to-treat principle. A secondary analysis will be performed for 'actual treatment  
24 received'. We also intend to perform a separate sub-analysis on the data from the first cycle only.  
25 Statistical analyses will be performed using Chi-square tests for dichotomous categorical outcome  
26 variables. Clinical and demographic data will be analysed with parametric tests if they are normally  
27 distributed (ANOVA with Bonferroni adjustment), otherwise appropriate non-parametric tests will  
28 be implemented (Kruskal-Wallis for between group analyses). Within patient changes (paired  
29 data), for example when comparing serum levels of melatonin at baseline and after treatment, will  
30 be compared using repeated measures ANOVA or Wilcoxon signed rank test depending on  
31 normality of data.  $P < 0.05$  will be considered statistically significant. Where statistically sound,  
32 adjusted odds ratios will be calculated to account for confounders or effect modifiers. To account  
33 for missing data, two analyses will be run, with the first excluding missing values and the second  
34 by imputation of missing values to determine how conclusions are affected. The SPSS multiple  
35 imputation routine (MCMC algorithm known as Fully Conditional Specification) will be used to  
36 handle missing data.  
37  
38  
39  
40  
41  
42  
43  
44  
45

### 46 **Adverse events and data safety and monitoring**

47  
48 An independent Data Safety and Monitoring Committee (DSMC) has been established at Monash  
49 Health in order to monitor occurrences of adverse events. The principle investigator will be  
50 available by telephone at all times during the trial and participants will be provided with contact  
51 details in case of any adverse events. Participants will also be interviewed at the time of their  
52 ultrasound and the day of oocyte collection to ascertain the occurrence of any adverse events.  
53 Serious adverse events will be recorded separately and followed up until resolution. Such events  
54 will be reported to the Monash Health, Monash University, Monash Surgical Private Hospital and  
55  
56  
57  
58  
59  
60

1  
2 Epworth HealthCare Human Research Ethics Committees, the Monash Health DSMC, the Monash  
3 Health Therapeutics Committee and, if directed by HREC, to the Australian Therapeutics and  
4 Goods Administration.  
5  
6  
7

### 8 9 **Trial modification and discontinuation**

10  
11 In the absence of adverse events, the medication regimen will not be modified once commenced.  
12 If other protocol changes are deemed necessary by the investigating team, ethics approval will be  
13 sought from all approving Human Research Ethics Committees. Once approved, protocol  
14 amendments will be notified to all investigators, administrators (eg. dispensing pharmacy) and  
15 trial participants via telephone.  
16  
17

18  
19 Patients are permitted to discontinue their inclusion in the trial at any point in time at their  
20 request or following an unexpected serious adverse event as described above. The DSMC will  
21 perform an interim analysis specifically assessing adverse events after 50% of participants have  
22 been recruited. Otherwise, the trial will cease follow-up once patients have given birth from a trial  
23 treatment cycle.  
24  
25  
26  
27

### 28 29 **Data collection, informed consent forms and confidentiality**

30  
31 Data will be recorded in both hardcopy and electronic form. Hardcopies will be stored in a secured  
32 filing cabinet at the administering institution. Electronic copies will be stored in encrypted files on  
33 a password protected computer. All data will be kept for 15 years, following this time, hardcopies  
34 will be destroyed by shredding or burning and electronic copies will be deleted by formatting.  
35 Organic samples will be stored until analysis in a secured locked temperature-controlled freezer at  
36 the Monash Institute of Medical Research that can only be accessed by authorized staff. Samples  
37 and participant records will not contain any directly identifiable information. No additional  
38 biological samples will be kept for use in ancillary studies.  
39  
40  
41

42 For access to data collection forms, including sleep diaries, medication compliance and informed  
43 consent forms please contact the principle investigator.  
44  
45  
46  
47

### 48 49 **Ethics and dissemination**

50  
51 Ethical approval has been obtained from Monash Health HREC (Ref:13402B), Monash University  
52 HREC (Ref: CF14/523 – 2014000181) and Monash Surgical Private Hospital HREC (Ref: 14107). Data  
53 analysis, interpretation and conclusions will be presented at national and international  
54 conferences and published in peer-reviewed journals. De-identified summary results will also be  
55 made publically available on the Monash IVF website.  
56  
57  
58  
59  
60



## Discussion

The MIART trial has the potential to improve IVF treatment protocols, with both immediate and translational benefit to patients. If melatonin is found to improve outcomes after IVF/ICSI, it may become a routine part of management of the infertile couple. We aim to set precedence and a framework by which others may structure further investigation into melatonin and other adjuvant therapies in the future. The intention of this study is as a pilot trial, primarily designed to provide un-biased data as a foundation for further research into this area. It is anticipated that the effect size observed in this trial will be useful to more appropriately power subsequent RCTs with the most effective dose of melatonin. In summary, MIART will be the first trial designed to determine a dose-response relationship of melatonin on biochemical and physiological markers of follicle health and also clinical pregnancy rates.

## Contributors:

The idea for the trial was conceived by SF, LR, and EW. SF was involved in research design and primary writing of study protocol and manuscript. TO was involved in the design and writing of the manuscript. LR and EW were involved in the trial design, writing, editing and approval of the final manuscript.

## Funding

Funding statement: This work is supported both financially and in-kind by the Monash IVF Research and Education Foundation who peer-reviewed this study prior to the approval of funding. In-kind and financial support was also afforded by The Department of Obstetrics and Gynaecology, Monash University and The Ritchie Centre, MIMR-PHI. No funding agency had a role in the design, implementation or analysis of this trial.

## Conflict of interest statement

SF is supported by an NHMRC Postgraduate Scholarship. No conflicts of interest are identified for SF, EW or TO. BV and LR are minority shareholders in Monash IVF. LR has received unconditional research and educational grants from MSD® and Merck Serono®. The trial sponsor had no influence on trial design, implementation, analysis or presentation.



## References

1. Kojo S. Vitamin C: basic metabolism and its function as an index of oxidative stress. *Curr Med Chem* 2004;11:1041-64.
2. Rahman K. Studies on free radicals, antioxidants, and co-factors. *Clin Interv Aging* 2007;2:219-36.
3. Bouayed J, Bohn T. Exogenous antioxidants - Double-edged swords in cellular redox state: Health beneficial effects at physiologic doses versus deleterious effects at high doses. *Oxid Med Cell Longev* 2010;3:228-37.
4. Valko M, Leibfritz D, Moncol J, et al. Free radicals and antioxidants in normal physiological functions and human disease. *Int J Biochem Cell Biol* 2007;39:44-84.
5. Tamura H, Takasaki A, Taketani T *et al.* The role of melatonin as an antioxidant in the follicle. *J Ovarian Res* 2012;5.
6. Guerin P, El Mouatassim S, Menezo Y. Oxidative stress and protection against reactive oxygen species in the pre-implantation embryo and its surroundings. *Hum Reprod Update* 2001;7:175-89.
7. Yoshida M, Ishigati K, Nagai T, et al. Glutathione concentration during maturation and after fertilization in pig oocytes: relevance to the ability of oocytes to form male pronucleus. *Biol Reprod* 1993;49:89-94.
8. Fatehi A, Roelen B, Colenbrander B *et al.* Presence of cumulus cells during in vitro fertilization protects the bovine oocyte against oxidative stress and improves first cleavage but does not affect further development. *Zygote* 2005;13:177-85.
9. Zeng H, Ren Z, Yeung W *et al.* Low mitochondrial DNA and ATP contents contribute to the absence of birefringent spindle imaged with PolScope in in vitro matured human oocytes. *Hum Reprod* 2007;22:1681-6.
10. Van Blerkom J, Davis P, Lee J. ATP content of human oocytes and developmental potential and outcome after in-vitro fertilization and embryo transfer *Hum Reprod* 1995;10:415-24.
11. Espey L. Current status of the hypothesis that mammalian ovulation is comparable to an inflammatory reaction. *Biol Reprod* 1994;50:233-8.
12. Tamura H, Takasaki A, Miwa I *et al.* Oxidative stress impairs oocyte quality and melatonin protects oocytes from free radical damage and improves fertilization rate. *J Pineal Res* 2008;44:280-7.
13. Tamura H, Taketani T, Takasaki A, et al. Influence of oxidative stress on oocyte quality and protective role of melatonin as an antioxidant. In: 20th World Congress on Fertility and Sterility, IFFS 2010. Vol. 7. Munich, Germany: Journal fur Reproduktionsmedizin und Endokrinologie, 2010:366.
14. Reiter R, Rosales-Corral S, Manchester L, Tan D. Peripheral reproductive organ health and melatonin: ready for prime time. *Int J Mol Sci* 2013;14:7231-72.
15. Lord T, Nixon B, Jones KT, et al. Melatonin prevents postovulatory oocyte aging in the mouse and extends the window for optimal fertilization in vitro. *Biol Reprod* 2013.
16. Wood S, Quinn A, Troupe S, et al. Seasonal variation in assisted conception cycles and the influence of photoperiodism on outcome in in vitro fertilization cycles. *Hum Fertil* 2006;9:223-9.
17. Agarwal A, Gupta S, Sharma RK. Role of oxidative stress in female reproduction. *Reprod Biol Endocrinol* 2005;3.
18. Srinivasan V, Spence W, Pandi-Perumal SR., et al. Melatonin and human reproduction: shedding light on the darkness hormone. *Gynecol Endocrinol* 2009;25:779-85.
19. Dholpuria S, Vyas S, Purohit GN, et al. Sonographic monitoring of early follicle growth induced by melatonin implants in camels and the subsequent fertility. *J Ultrasound* 2012;15:135-41.
20. Abecia JA, Palacin I, Forcada F, et al. The effect of melatonin treatment on the ovarian response of ewes to the ram effect. *Domest Anim Endocrinol* 2006;31:52-62.
21. Rodriguez-Osorio N, Kim I, Wang H, et al. Melatonin increases cleavage rate of porcine preimplantation embryos in vitro. *J Pineal Res* 2007;43:283-8.
22. Sanchez-Barcelo EJ, Mediavilla MD, Tan DX, et al. Clinical uses of melatonin: Evaluation of human trials. *Curr Med Chem* 2010;17:2070-95.
23. Ishizuka B, Kuribayashi Y, Murai K, et al. The effect of melatonin on in vitro fertilization and embryo development in mice. *J Pineal Res* 2000;28:48-51.

- 1 24. Choi J, Park S, Lee E *et al.* Anti-apoptotic effect of melatonin on preimplantation development of  
2 porcine parthenogenetic embryos. *Mol Reprod Dev* 2008;75:1127-35.
- 3 25. Kang J, Koo O, Kwon D *et al.* Effects of melatonin on in vitro maturation of porcine oocyte and  
4 expression of melatonin receptor RNA in cumulus and granulosa cells. *J Pineal Res* 2009;46:22-8.
- 5 26. Wei D, Zhang C, Xie J *et al.* Supplementation with low concentrations of melatonin improves  
6 nuclear maturation of human oocytes in vitro. *J Assist Reprod Genet* 2013;30:933-8.
- 7 27. Kim M, Park E, Kim H *et al.* Does supplementation of in-vitro culture medium with melatonin  
8 improve IVF outcome in PCOS? *Reprod Biomed Online* 2013;26:22-9.
- 9 28. Knapen M, Zusterzeel P, Peters W, *et al.* Glutathione and glutathione-related enzymes in  
10 reproduction: a review. *Eur J Obstet Gynecol Reprod Biol* 1999;82:171-84.
- 11 29. Eryilmaz O, Devran A, Sarikaya E, *et al.* Melatonin improves the oocyte and the embryo in IVF  
12 patients with sleep disturbances, but does not improve the sleeping problems. *J Assist Reprod Genet*  
13 2011;28:815-20.
- 14 30. Batioğlu A, Şahin U, Gürlek B, *et al.* The efficacy of melatonin administration on oocyte quality.  
15 *Gynecol Endocrinol* 2012;28:91-3.
- 16 31. Taketani T, Tamura H, Takasaki A *et al.* Protective role of melatonin in progesterone production by  
17 human luteal cells. *J Pineal Res* 2011;51:207-13.
- 18 32. Manca M, Manunta M, Spezzigu A *et al.* Melatonin deprivation modifies follicle and corpora lutea  
19 growth dynamics in a sheep model (Epub ahead of print). *Reproduction* 2014.
- 20 33. Baratta M, Tamanini C. Effect of melatonin on the in vitro secretion of progesterone and estradiol  
21 17 beta by ovine granulosa cells. *Acta Endocrinol (Copenh)* 1992 127:366-70.
- 22 34. Wallace J, Robinson J, Wigzell S, *et al.* Effect of melatonin on the peripheral concentrations of LH  
23 and progesterone after oestrus, and on conception rate in ewes. *J Endocrinol* 1988 119:523-30.
- 24 35. Zhang L, Chai M, Tian X *et al.* Effects of melatonin on superovulation and transgenic embryo  
25 transplantation in small-tailed han sheep (*Ovis aries*). *Neuro Endocrinol Lett* 2013;34:294-301.
- 26 36. Rizzo P, Raffone E, Benedetto V. Effect of the treatment with myo-inositol plus folic acid plus  
27 melatonin in comparison with a treatment with myo-inositol plus folic acid on oocyte quality and pregnancy  
28 outcome in IVF cycles. A prospective, clinical trial. *EmbaseEuropean Review for Medical and*  
29 *Pharmacological Sciences* 2010;14:555-61.
- 30 37. Nazzaro A, Salerno A, Marino S, *et al.* The addition of melatonin to myo-inositol plus folic acid  
31 improve oocyte quality and pregnancy outcome in IVF cycle. A prospective clinical trial. . In: 27th Annual  
32 Meeting of the European Society of Human Reproduction and Embryology, ESHRE. Vol. 26. Stockholm  
33 Sweden: EmbaseHuman Reproduction, 2011:i227-i8.
- 34 38. Pacchiarotti A, Carlomagno G, Unfer V, *et al.* Role of Myo-inositol and melatonin supplementation  
35 in follicular fluid of IVF patients with polycystic ovarian syndrome: a randomized controlled trial.  
36 *ClinicalTrialsgov* 2013.
- 37 39. Unfer V, Raffone E, Rizzo P, *et al.* *et al.* Effect of a supplementation with myo-inositol plus  
38 melatonin on oocyte quality in women who failed to conceive in previous in vitro fertilization cycles for  
39 poor oocyte quality: a prospective, longitudinal, cohort study. *Gynaecol Endocrinol* 2011;27:857-61.
- 40 40. Hemadi M, Shokri S, Pourmatroud E, *et al.* Follicular dynamic and immunoreactions of the vitrified  
41 ovarian graft after host treatment with variable regimens of melatonin. *Am J Reprod Immunol* 2012;67:401-  
42 12.
- 43 41. Jahnke G, Marr M, Myers C, *et al.* Maternal and developmental toxicity evaluation of melatonin  
44 administered orally to pregnant Sprague-Dawley rats. *Toxicol Sci* 1999;50:271-9.
- 45 42. Gonciarz M, Gonciarz Z, Bielanski W *et al.* The effects of long-term melatonin treatment on plasma  
46 liver enzymes levels and plasma concentrations of lipids and melatonin in patients with nonalcoholic  
47 steatohepatitis: a pilot study. *J Physiol Pharmacol* 2012;63:35-40.
- 48 43. de Lourdes V. Seabra M, Bignotto M, *et al.* Randomized, double-blind clinical trial, controlled with  
49 placebo, of the toxicology of chronic melatonin treatment. *J Pineal Res* 2000;29:193-200.
- 50 44. Goldberg-Stern H, Oren H, Peled N, *et al.* Effect of melatonin on seizure frequency in intractable  
51 epilepsy: a pilot study. *J Child Neurol* 2012;27:1524-8.
- 52
- 53
- 54
- 55
- 56
- 57
- 58
- 59
- 60

- 1  
2  
3  
4  
5  
6  
7  
8  
9  
10  
11  
12  
13  
14  
15  
16  
17  
18  
19  
20  
21  
22  
23  
24  
25  
26  
27  
28  
29  
30  
31  
32  
33  
34  
35  
36  
37  
38  
39  
40  
41  
42  
43  
44  
45  
46  
47  
48  
49  
50  
51  
52  
53  
54  
55  
56  
57  
58  
59  
60
45. Del Fabbro E, Dev R, Hui D, et al. Effects of melatonin on appetite and other symptoms in patients with advanced cancer and cachexia: a double-blind placebo-controlled trial. *J Clin Oncol* 2013;31:1271-6.
46. Voordouw B, Euser R, Verdonk R *et al.* Melatonin and melatonin-progestin combinations alter pituitary-ovarian function in women and can inhibit ovulation. *J Clin Endocrinol Metab* 1992;74:108-17.
47. Weaver D. Reproductive safety of melatonin: a "wonder drug" to wonder about. *J Biol Rhythms* 1997;12:682.
48. . Centers for Disease Control and Prevention, American Society for Reproductive Medicine, Society for Assisted Reproductive Technology. 2011 Assisted reproductive technology fertility clinic success rates report. In. Atlanta (GA): US Dept of Health and Human Services, 2013.
49. Sampaio R, Conceição S, Miranda M, et al. MT3 melatonin binding site, MT1 and MT2 melatonin receptors are present in oocyte, but only MT1 is present in bovine blastocyst produced in vitro. *Reprod Biol Endocrinol* 2012;10.
50. Ciotta L, Stracquadanio M, Pagano I, et al. Effects of myo-inositol supplementation on oocyte's quality in PCOS patients: a double blind trial. *Eur Rev Med Pharmacol Sci* 2011;15:509-14.
51. Nishihara T, Hashimoto S, Ito K *et al.* Oral melatonin supplementation improves oocyte and embryo quality in women undergoing in vitro fertilization-embryo transfer. *Gynecol Endocrinol* 2014;30:359-62.
52. Chan A, Tetzlaff J, Gøtzsche P *et al.* SPIRIT 2013 explanation and elaboration: guidance for protocols of clinical trials. *BMJ* 2013;346.
53. Clarke JF, van Rumste MM, Farquhar CM, et al. Measuring outcomes in fertility trials: can we rely on clinical pregnancy rates? *Fertil Steril* 2010;94:1647-51.
54. Altman D, Bland J. Treatment allocation by minimisation. *BMJ* 2005;330:843.
55. Mills E, Chan A, Wu P, et al. Design, analysis, and presentation of crossover trials. *Trials* 2009;10.
56. Piantadosi S. *Clinical Trials: A Methodologic Perspective*. Wiley Series in Probability and Statistics. 2nd ed: John Wiley & Sons, 2013.
57. Waldhauser F, Waldhauser M, Lieberman H, et al. Bioavailability of oral melatonin in humans. *Neuroendocrinology* 1984;39:307-13.

1  
2  
3  
4  
5  
6  
7  
8  
9  
10  
11  
12  
13  
14  
15  
16  
17  
18  
19  
20  
21  
22  
23  
24  
25  
26  
27  
28  
29  
30  
31  
32  
33  
34  
35  
36  
37  
38  
39  
40  
41  
42  
43  
44  
45  
46  
47  
48  
49  
50  
51  
52  
53  
54  
55  
56  
57  
58  
59  
60

For peer review only

| <b>Clinical outcomes</b>                        | <b>Definition</b>                                                                                                                                                                                                          |
|-------------------------------------------------|----------------------------------------------------------------------------------------------------------------------------------------------------------------------------------------------------------------------------|
| Live birth rate                                 | Birth of a live baby after 24 weeks gestation                                                                                                                                                                              |
| Miscarriage rate                                | Loss of a diagnosed clinical pregnancy before 20 weeks gestation                                                                                                                                                           |
| Sleepiness score                                | Based on Karolinska <sup>a</sup> sleepiness scale during trial medication administration                                                                                                                                   |
| Pregnancy complication and adverse events rates | Including OHSS, multiple pregnancy, congenital or chromosomal abnormalities, stillbirth, preeclampsia, delivery before 34 weeks, delivery between 34 and 37 weeks, placenta praevia, gestational diabetes, low birthweight |
| <b>Embryological outcomes</b>                   |                                                                                                                                                                                                                            |
| Total number of oocytes collected               |                                                                                                                                                                                                                            |
| Oocyte maturity                                 |                                                                                                                                                                                                                            |
| Total number of embryos                         |                                                                                                                                                                                                                            |
| Embryo quality                                  |                                                                                                                                                                                                                            |
| Fertilization rate                              | The proportion of oocytes that become fertilised                                                                                                                                                                           |
| Utilisation rate                                | Proportion of zygotes undergoing embryo transfer or cryopreservation to oocytes fertilised                                                                                                                                 |
| <b>Biochemical outcomes</b>                     |                                                                                                                                                                                                                            |
| Biochemical pregnancy rate                      | Presence of serum hCG level of >25IU/l on Day 16 after embryo transfer                                                                                                                                                     |
| Melatonin levels in serum                       | At baseline and prior to oocyte collection                                                                                                                                                                                 |
| Melatonin levels in follicular fluid            | Taken from leading follicle from each ovary at time of oocyte collection                                                                                                                                                   |
| 8-OHdg levels in serum                          | At baseline and prior to oocyte collection                                                                                                                                                                                 |
| 8-OHdg levels in follicular fluid               | Taken from leading follicle from each ovary at time of oocyte collection                                                                                                                                                   |
| Oestradiol and Progesterone levels in serum     | Taken at baseline, during treatment and at the time of oocyte collection                                                                                                                                                   |
| <b>Sonographic outcomes</b>                     |                                                                                                                                                                                                                            |
| Follicular blood flow                           | Measured on last transvaginal ultrasound with power Doppler prior to oocyte collection                                                                                                                                     |
| Uterine artery blood flow                       | Measured on last transvaginal ultrasound with power Doppler prior to oocyte collection                                                                                                                                     |

**Table 1: Clinical Secondary Outcomes**

OHSS: Ovarian Hyperstimulation syndrome; hCG: human chorionic gonadotrophin; 8-OHdg: 8-hydroxy-2'-deoxyguanosine

<sup>a</sup>Reyner L, Horne J. Falling asleep whilst driving: are drivers aware of prior sleepiness? Int J Legal Med 1998;111:120-3

1  
2  
3  
4 **Figure Legends**

5  
6 **Figure 1: Participant timeline schematic - first cycle**

7  
8 <sup>a</sup>Placebo, melatonin 2mg twice daily, melatonin 4mg twice daily, melatonin 8mg twice daily

9  
10 hCG: human chorionic gonadotrophin; 8-OHdg: 8-hydroxy- 2'-deoxyguanosine

11  
12 Note: Patients who are not pregnant after their first cycle will be offered a second cycle with a different  
13 trial medication (Figure 2)

14  
15  
16  
17 **Figure 2: Participant timeline schematic - second cycle in those not pregnant after their first cycle**

18  
19 <sup>a</sup> For participants who do not become pregnant in their first cycle, each will be offered allocation to the next  
20 treatment arm for their second cycle (ie. A will be allocated to B, B to C, C to D and D to A)

21  
22 ET: embryo transfer; hCG: human chorionic gonadotrophin

1  
2  
3  
4  
5  
6  
7  
8  
9  
10  
11  
12  
13  
14  
15  
16  
17  
18  
19  
20  
21  
22  
23  
24  
25  
26  
27  
28  
29  
30  
31  
32  
33  
34  
35  
36  
37  
38  
39  
40  
41  
42  
43  
44  
45  
46  
47  
48  
49  
50  
51  
52  
53  
54  
55  
56  
57  
58  
59  
60

## A pilot double-blind randomised placebo-controlled dose-response trial assessing the effects of melatonin on infertility treatment (MIART): study protocol

### Corresponding Author:

Dr Shavi Fernando

shavif@hotmail.com

### Authors:

Dr Shavi Fernando

MBBS(hon) BMedSc(hon)

MIMR-PHI Institute of Medical Research 246 Clayton rd, Clayton Victoria Australia 3168

Department of Obstetrics and Gynaecology, Monash University, Clayton, Victoria Australia

Level 5, Monash Medical Centre, Clayton rd, Clayton, Victoria Australia 3168

Dr Tiki Osianlis

BSc(hon) PhD

Department of Obstetrics and Gynaecology, Monash University, Clayton, Victoria Australia

Monash IVF, 252 Clayton Rd, Clayton, Victoria Australia 3168

A/Prof Beverley Vollenhoven

MD PhD FRANZCOG CREI

Department of Obstetrics and Gynaecology, Monash University, Clayton Australia

Level 5, Monash Medical Centre, Clayton rd, Clayton, Victoria Australia 3168

Prof Euan Wallace

MBChB MD FRCOG FRANZCOG

MIMR-PHI Institute of Medical Research 246 Clayton rd, Clayton Victoria Australia 3168

1 Department of Obstetrics and Gynaecology, Monash University, Clayton, Australia

2  
3 Level 5, Monash Medical Centre, Clayton rd, Clayton, Victoria Australia 3168

4  
5  
6  
7 A/Prof Luk Rombauts

8  
9 MD PhD FRANZCOG CREI

10 MIMR-PHI Institute of Medical Research 246 Clayton rd, Clayton Victoria Australia 3168

11  
12 Department of Obstetrics and Gynaecology, Monash University, Clayton, Victoria Australia

13  
14  
15 Monash IVF, 252 Clayton Rd, Clayton, Victoria Australia 3168

16  
17  
18  
19  
20 **Trial Sponsor:**

21 The Ritchie Centre, Monash Medical Centre, Clayton rd, Clayton VIC AUS 3168

22  
23 03 95946666

24  
25  
26  
27  
28 **Running Title:** Melatonin in ART - MIART randomised trial: study protocol

29  
30  
31  
32 **Keywords:**

33 Melatonin, assisted reproductive technology (ART), in-vitro fertilization, oxidative stress, protocol

34  
35  
36  
37  
38 **Word Count:** 2796



## Abstract

### Introduction

High levels of oxidative stress can have considerable impact on the outcomes of in-vitro fertilization (IVF). Recent studies have reported that melatonin, a neurohormone secreted from the pineal gland in response to darkness, has significant anti-oxidative capabilities which may protect against the oxidative stress of infertility treatment on gametes and embryos. Early studies of oral melatonin (3-4mg/day) in IVF have suggested favourable outcomes. However, most trials were poorly designed and none have addressed the optimum dose of melatonin. We present a proposal for a pilot double-blind randomised placebo-controlled dose-response trial aimed to determine whether oral melatonin supplementation during ovarian stimulation can improve the outcomes of assisted reproductive technology.

### Methods and analyses

We will recruit 160 infertile women into one of four groups: placebo (n=40); melatonin 2mg twice per day (n=40); melatonin 4mg twice per day (n=40) and melatonin 8mg twice per day (n=40). The primary outcome will be clinical pregnancy rate. Secondary clinical outcomes include oocyte number/quality, embryo number/quality and fertilization rate. We will also measure serum melatonin and the oxidative stress marker, 8-hydroxy- 2'-deoxyguanosine (8-OHdg) at baseline and after treatment and levels of these in follicular fluid at egg pick-up. We will investigate follicular blood flow with Doppler ultrasound, patient sleepiness scores, and pregnancy complications, comparing outcomes between groups. This protocol has been designed in accordance with the SPIRIT 2013 Guidelines.

### Ethics and dissemination:

Ethical approval has been obtained from Monash Health HREC (Ref: 13402B), Monash University HREC (Ref: CF14/523 – 2014000181) and Monash Surgical Private Hospital HREC (Ref: 14107). Data analysis, interpretation and conclusions will be presented at national and international conferences and published in peer-reviewed journals.

**Registration Details:** Version 1. Australian New Zealand Clinical Trials Registry, ACTRN: ACTRN12613001317785. The complete WHO Registration Data Set, as described by the SPIRIT 2013 guidelines is available for viewing at <https://www.anzctr.org.au/Trial/Registration/TrialReview.aspx?id=365376>

## Strengths and limitations

- This trial is a well-designed pilot study to achieve biochemically and clinically relevant outcomes.
- Significant preliminary research has been performed in order to appropriately design the study to fill gaps in current knowledge.
- This is the first randomised placebo controlled dose-finding trial of melatonin in the field of infertility world-wide and if successful, has the potential to provide a foundation for future large randomised controlled trials.

~~— Because of constraints of such a pilot study in the infertile population, relatively small numbers of participants are anticipated. To help minimise the effect of this, a cross-over arm will be introduced. It is expected that this limitation will be overcome in future trials that will be designed based on this study.~~

- A cross-over design will be used as this is known to improve recruitment rates

## Introduction

Humans are aerobic organisms and when oxygen is utilised in metabolic processes, free oxygen radicals are created as a consequence. These radicals are oxidants and contain 'free' valence electrons, making them highly unstable and therefore reactive, capable of causing injury to cells. This occurs by accepting electrons from another molecule (a reductant) in order to reach stability. In doing so, the chemical structure of the reductant is changed, and may no longer be able to perform its designated function. In fact, often the reductant can then produce or sometimes even become an oxidant having the potential to cause oxidative stress in its own right.<sup>1</sup> Anti-oxidative agents are present endogenously and can also be administered exogenously. They are designed to reduce free radicals by donating electrons to stabilise the free radical.<sup>2</sup> The term 'reactive oxygen species' (ROS), not only includes free radicals but also molecularly stable non-radical molecules which contain oxygen and are capable of causing oxidative stress, such as hydrogen peroxide (H<sub>2</sub>O<sub>2</sub>).<sup>3</sup> While ROS are necessary for essential physiological processes, an overabundance can result in cellular and tissue damage and this is commonly referred to as 'oxidative stress'.<sup>4</sup> Oxidative stress can be measured in bodily fluids by markers including 8-hydroxy- 2'-deoxyguanosine (8-Ohdg).<sup>5</sup>

Over recent years, the potential role of oxidative stress in the outcomes of assisted reproductive technology (ART) has been gaining increasing attention, in particular with regards to in-vitro fertilization (IVF) and intracytoplasmic sperm injection (ICSI). This is perhaps not surprising given that ART exposes both oocytes and embryos to high levels of superoxide free radicals during gamete and embryo culture<sup>6</sup>. Indeed, in addition to the culture conditions, *in vitro* the oocytes are not afforded the normal protection of the antioxidant-rich follicular fluid or surrounding cumulus cells, leaving them more susceptible to oxidative damage.<sup>7,8</sup> Reproductive processes such as chromosome segregation (resulting in euploid oocytes), polar body extrusion (necessary for haploid oocytes), fertilization and early cleavage (to avoid arrested embryos) require energy. As the average age of women seeking fertility treatment rises, the level of ROS and subsequent oxidative stress increases, resulting in mitochondrial DNA mutations which in turn affect ATP production in the oocyte. Without the necessary ATP, required cellular processes cannot occur correctly, having a direct effect on the quality of the oocyte, embryo and the final outcome of the IVF procedure.<sup>9,10</sup>

It has been shown that oocyte quality begins to deteriorate immediately following ovulation. This has been thought to be an inflammatory driven oxidative stress process<sup>11</sup> whereby the production of cytokines and proteases is associated with an increase in ROS which in turn impair oocyte maturation.<sup>12-14</sup> Evidence of oxidative damage in *in vitro* oocytes has been shown to exist as early as 8 hours after ovulation.<sup>15</sup> Nor surprisingly it has been shown that high levels of the oxidative stress in the follicular fluid of infertile women are associated with poor oocyte maturation and embryo quality, and that inducers of oxidative stress can be used to inhibit oocyte maturation.<sup>5,12</sup>

1 Together, these observations highlighting the importance of oxidative stress in the developing  
2 follicle and in the future success of fertilization, whether *in vivo* or *in vitro*.  
3  
4

5 Recently, it has been shown that melatonin, a neurohormone secreted from the pineal gland, has  
6 important oxygen-scavenging properties which naturally mitigate oxidative stress by both  
7 neutralising ROS in human tissues and by inducing endogenous anti-oxidant enzymes.<sup>16-18</sup>  
8

9 Melatonin has been shown to be beneficial as an adjuvant therapy in the management of many  
10 medical conditions in which oxidative stress has been implicated including diabetes, glaucoma,  
11 irritable bowel syndrome and fertility.<sup>19-22</sup>  
12  
13

14 The effects of melatonin supplementation on culture media,<sup>12, 21, 23-27</sup> gametes,<sup>5, 15, 28</sup> embryos<sup>15,</sup>  
15 <sup>29, 30</sup> and luteal function<sup>31-35</sup> have been identified as useful areas for investigation. Human clinical  
16 studies have begun recently, with emphasis on oral supplementation of melatonin during the  
17 stimulation cycle and its effects on oocyte and embryo quality.<sup>12, 36-39</sup>  
18  
19

20 Importantly, melatonin has a remarkably benign safety profile in both animal and human studies.  
21 A mouse study investigating dose-related effects of melatonin on ovarian grafts found that doses  
22 at 200mg/kg/day have immunosuppressant effects, leading to prolongation of graft survival,  
23 however, also resulted in a reduction in healthy follicles. They concluded that doses of greater  
24 than 20mg/kg/day resulted in a reduction in both healthy follicles and ovarian size.<sup>40</sup> The maternal  
25 lowest observed adverse effect level (LOAEL), the lowest level at which an adverse event was  
26 observed, appears to be around 200mg/kg/day, equivalent to over 1g per day for humans.  
27 Furthermore, in rodent studies, no significant adverse effects on either the embryo or fetus have  
28 been reported for up to doses of 200mg/kg/day.<sup>41</sup> There have been several randomised controlled  
29 trials addressing high doses of melatonin in human adults and children,<sup>42-46</sup> and reports have  
30 established that toxicity levels in humans are not reached until a daily dose of at least 5mg/kg.<sup>47</sup>  
31  
32  
33  
34  
35  
36  
37

### 38 Rationale

39 In the USA in 2011, only 1 in 4 of all IVF cycles resulted in clinical pregnancy with less than 1 in 5  
40 cycles resulting in live birth<sup>48</sup>. That is 4 out of 5 IVF cycles do not result in a live baby. Clearly there  
41 is much room for further improvement, if only to meet societal expectations and reduce  
42 healthcare costs. Continued research into novel adjuvant therapies designed to improve IVF  
43 outcomes is therefore merited. Several human and animal studies support the use of melatonin in  
44 the treatment of infertility, with beneficial actions being largely attributed to its anti-oxidant  
45 properties. Furthermore, melatonin receptors are found on granulosa cells, oocytes and  
46 embryos,<sup>49</sup> with intrafollicular melatonin concentrations being significantly higher than those  
47 found in serum, again suggesting a physiological role in reproduction.<sup>39, 67, 68</sup> The human studies  
48 addressing the use of melatonin in infertility treatment undertaken to date have been small and  
49 not placebo-controlled. None have attempted to identify an optimal dose.<sup>36-38, 50</sup> Further,  
50 interpretation of any outcomes have been hampered by the within-patient comparison design,  
51 where patients act as their own controls.<sup>12, 39, 51</sup>  
52  
53  
54  
55  
56  
57  
58  
59  
60

1  
2 | We have designed this study to be the first [randomised](#), placebo-controlled, dose-finding clinical  
3 trial to investigate the effect(s), if any, of oral melatonin on the clinical pregnancy rate following  
4 IVF/ICSI treatment.  
5  
6  
7

## 8 9 **Aims**

10  
11 The overall aim of this trial is to determine whether oral melatonin administration can improve the  
12 outcomes of IVF/ICSI. In order to address this, we will determine whether melatonin  
13 administration has a dose-response effect in women undergoing IVF/ICSI on:  
14

- 15 1. biochemical markers of follicle and oocyte health (melatonin, 8-hydroxy- 2'-  
16 deoxyguanosine (8-OHdg), progesterone, oestradiol)
  - 17 2. sonographic markers of follicle health
  - 18 3. patient sleepiness
  - 19 4. pregnancy rate following IVF/ICSI
- 20  
21  
22  
23  
24  
25  
26  
27

## 28 29 **Methods and analyses**

30 This protocol has been designed in accordance with the SPIRIT 2013 Guidelines.<sup>52</sup> Recruitment will  
31 commence in July 2014. This will occur over two years. Analysis and dissemination will occur after  
32 this period of time. The study is expected to be completed by February 2017.  
33  
34  
35  
36

## 37 38 **Study design**

39 Pilot phase II cross-over double-blinded randomised placebo-controlled dose-response trial  
40  
41  
42

## 43 44 **Subjects**

45 We plan to recruit a total of 160 infertile women undergoing IVF/ICSI.  
46  
47  
48  
49

## 50 51 **Study setting**

52 Patients will be recruited from Monash IVF infertility clinics in Melbourne, Australia over a period  
53 of 2 years.  
54  
55  
56  
57  
58  
59  
60

## Interventions to be measured

This trial will have four arms. All capsules will be indistinguishable from each other.

1. Placebo capsule taken twice per day
2. 2mg melatonin capsule twice per day (4mg/d total)
3. 4mg melatonin capsule twice per day (8mg/d total)
4. 8mg melatonin capsule twice per day (16mg/d total)

## Primary Outcome

Clinical pregnancy rate,<sup>53</sup> defined as the presence of a live pregnancy in the uterine cavity at a transvaginal ultrasound (TVUS) at 6-8 weeks' gestation.

## Secondary outcomes

See *Table 1* for details.

## Sample Size

As this is a pilot dose-finding study, without precedence on which to base accurate power calculations, a power calculation has not been performed. Part of our aim is to provide clarification allowing for larger randomised trials to be designed in the future. We hypothesise that melatonin will have a positive dose-response effect on clinical pregnancy rates after IVF/ICSI. We have chosen a convenience sample of 160 participants, 40 in each of the four groups, in order to assess plausible morphological, biochemical and sonographic surrogate markers for oocyte quality, as well as to provide an indication of the effect size for each dose for our primary outcome, clinical pregnancy rate. Conservatively estimating that, in total, 50% of patients (n=80) do not get pregnant after their first cycle, we may assume that 60 patients will participate in the crossover arm (allowing for drop-outs) in their second cycle and be allocated to a different treatment group.

## Inclusion criteria

1. Undergoing first cycle of IVF or ICSI
2. Age between 18 and 45

3. Body mass index (BMI) between 18 and 35
4. Undergoing a GnRH antagonist cycle (without OCP scheduling)

### Exclusion criteria

1. Current untreated pelvic pathology – moderate to severe endometriosis, submucosal uterine fibroids/polyps assessed by the treating specialist to affect fertility, pelvic inflammatory disease, uterine malformations, Asherman's syndrome and hydrosalpinx.
2. Currently enrolled in another interventional clinical trial
3. Concurrent use of other adjuvant therapies (eg. Chinese herbs, acupuncture)
4. Current pregnancy
5. Malignancy or other contraindication to IVF
6. Autoimmune disorders
7. Undergoing preimplantation genetic diagnosis (PGD)
8. Hypersensitivity to melatonin or its metabolites
9. Concurrent use of any of the following medications
  - a. Fluvoxamine (eg. Luvox, Movox, Voxam)
  - b. Cimetidine (eg. Magicul, Tagamet)
  - c. Quinolones and other CYP1A2 inhibitors (Ciprofloxacin, Avalox)
  - d. Carbamazepine (eg. Tegretol), rifampicin (eg. Rifadin) and other CYP1A2 inducers
  - e. Zolpidem (eg. Stilnox), zopiclone (eg. Imovane) and other non-benzodiazepine hypnotics
10. Inability to comply with trial protocol

### Concomitant care

Aside from trial protocol and inclusion/exclusion criteria listed above, standard concomitant care, such as folic acid supplements, is permitted.

### Participant enrolment

1 This trial will begin recruitment at the level of the infertility specialist. Once identified as requiring  
2 IVF/ICSI, and satisfying inclusion and exclusion criteria, the patient will be provided with detailed  
3 written information about the trial protocol. After approximately one week, the patient will be  
4 approached and written informed consent will be obtained by the principle investigator at the first  
5 visit with the infertility clinic nurse. Baseline blood testss will be taken and basic demographic  
6 information including aetiology of infertility will then be taken recorded. and The patient will will  
7 then be randomised by the principle investigator (see below) to one of the study arms and  
8 provided with the trial medication. The participant will commence taking the trial medication on  
9 the day that ovarian stimulation injections begin (Day 2-3 of menses) at 0800 and 2200 each day,  
10 with the last capsule being taken at 2200 the night before oocyte collection.

11 For a summarised participant timeline, See *Figure 1* and *Figure 2*.

### 20 Allocation concealment, blinding and randomisation

21 Association of particular treatment effects (e.g. sleepiness) with certain randomisation codes may  
22 become apparent during the trial and to prevent further allocation bias proper concealment of  
23 treatment allocation is necessary. Each treatment arm will be randomly allocated a letter (A, B, C  
24 or D) by way of opaque sealed envelope. Randomisation will be computerised and patients will be  
25 randomised at a ratio of 1:1:1:1 to one of the groups, A-D, using the minimisation method, a  
26 method of randomisation accounting for factors known to affect the outcome used in small trials  
27 to prevent selection bias.<sup>54</sup>

28 With a crossover design improved patient recruitment is very likely because all non-pregnant  
29 participants will be guaranteed at least one cycle with one of the doses of melatonin.<sup>55, 56</sup> After  
30 completing the first study cycle, those participants that are not pregnant will be recruited for the  
31 cross-over cycle in which they will be assigned the next treatment arm. For example, if a  
32 participant were allocated to treatment group A in their first cycle and did not become pregnant,  
33 they would be offered allocation to group B in their second cycle and so on. The half life of  
34 melatonin is short, being completely eliminated from the body shortly after 24 hours.<sup>57</sup> Once  
35 patients have had their first stimulated cycle of treatment, a second stimulated cycle will routinely  
36 not commence until at least 4 weeks after the negative pregnancy test (approximately 6 weeks  
37 after last melatonin dose), much longer than the elimination time for melatonin. This will be a  
38 sufficient washout period prior to inclusion in a second cycle.

39 Participants will be blinded by receiving identical-appearing unmarked capsules. All trial  
40 researchers will be blinded to treatment allocation group until after analyses are performed at the  
41 completion of the trial. A Data Safety Monitoring Committee (see *Adverse events* for details) and  
42 dispensing pharmacy will be aware of allocation to allow identification of any unbalanced or  
43 multiple serious adverse events that may necessitate emergency unblinding of researchers and  
44 participants.



### Adherence and retention

In order to ensure the integrity of study data, participant adherence to trial protocol will be assessed on a medication administration record updated daily by the participant. At oocyte collection, participants will return medication bottles and compliance will be confirmed by counting remaining tablets. This will be recorded on individual patient compliance forms and patient record forms. Every reasonable effort will be made from the time of enrolment until the end of follow-up to maintain contact with and maintain subject participation in the trial.

### Analysis plan

SPSS v22.0 (IBM, Armonk, New York) will be used for data analysis. Primary analysis will occur by the intention-to-treat principle. A secondary analysis will be performed for 'actual treatment received'. We also intend to perform a separate sub-analysis on the data from the first cycle only. Statistical analyses will be performed using Chi-square tests for dichotomous categorical outcome variables. Clinical and demographic data will be analysed with parametric tests if they are normally distributed (ANOVA with Bonferroni adjustment), otherwise appropriate non-parametric tests will be implemented (Kruskal-Wallis for between group analyses). Within patient changes (paired data), for example when comparing serum levels of melatonin at baseline and after treatment, will be compared using repeated measures ANOVA or Wilcoxon signed rank test depending on normality of data.  $P < 0.05$  will be considered statistically significant. Where statistically sound, adjusted odds ratios will be calculated to account for confounders or effect modifiers. To account for missing data, two analyses will be run, with the first excluding missing values and the second by imputation of missing values to determine how conclusions are affected. The SPSS multiple imputation routine (MCMC algorithm known as Fully Conditional Specification) will be used to handle missing data.

### Adverse events and data safety and monitoring

An independent Data Safety and Monitoring Committee (DSMC) has been established at Monash Health in order to monitor occurrences of adverse events. The principle investigator will be available by telephone at all times during the trial and participants will be provided with contact details in case of any adverse events. Participants will also be interviewed at the time of their ultrasound and the day of oocyte collection to ascertain the occurrence of any adverse events. Serious adverse events will be recorded separately and followed up until resolution. Such events will be reported to the Monash Health, Monash University, Monash Surgical Private Hospital and Epworth HealthCare Human Research Ethics Committees, the Monash Health DSMC, the Monash

1  
2 Health Therapeutics Committee and, if directed by HREC, to the Australian Therapeutics and  
3 Goods Administration.  
4

### 5 6 7 **Trial modification and discontinuation**

8  
9  
10 In the absence of adverse events, the medication regimen will not be modified once commenced.  
11 If other protocol changes are deemed necessary by the investigating team, ethics approval will be  
12 sought from all approving Human Research Ethics Committees. Once approved, protocol  
13 amendments will be notified to all investigators, administrators (eg. dispensing pharmacy) and  
14 trial participants via telephone.  
15

16  
17 Patients are permitted to discontinue their inclusion in the trial at any point in time at their  
18 request or following an unexpected serious adverse event as described above. The DSMC will  
19 perform an interim analysis specifically assessing adverse events after 50% of participants have  
20 been recruited. Otherwise, the trial will cease follow-up once patients have given birth from a trial  
21 treatment cycle.  
22  
23

### 24 25 26 27 **Data collection, informed consent forms and confidentiality**

28  
29 Data will be recorded in both hardcopy and electronic form. Hardcopies will be stored in a secured  
30 filing cabinet at the administering institution. Electronic copies will be stored in encrypted files on  
31 a password protected computer. All data will be kept for 15 years, following this time, hardcopies  
32 will be destroyed by shredding or burning and electronic copies will be deleted by formatting.  
33 Organic samples will be stored until analysis in a secured locked temperature-controlled freezer at  
34 the Monash Institute of Medical Research that can only be accessed by authorized staff. Samples  
35 and participant records will not contain any directly identifiable information. No additional  
36 biological samples will be kept for use in ancillary studies.  
37

38  
39 For access to data collection forms, including sleep diaries, medication compliance and informed  
40 consent forms please contact the principle investigator.  
41  
42  
43  
44  
45

### 46 47 **Ethics and dissemination**

48  
49 Ethical approval has been obtained from Monash Health HREC (Ref:13402B), Monash University  
50 HREC (Ref: CF14/523 – 2014000181) and Monash Surgical Private Hospital HREC (Ref: 14107). Data  
51 analysis, interpretation and conclusions will be presented at national and international  
52 conferences and published in peer-reviewed journals. De-identified summary results will also be  
53 made publically available on the Monash IVF website.  
54  
55  
56  
57

## Discussion

The MIART trial has the potential to improve IVF treatment protocols, with both immediate and translational benefit to patients. If melatonin is found to improve outcomes after IVF/ICSI, it may become a routine part of management of the infertile couple. We aim to set precedence and a framework by which others may structure further investigation into melatonin and other adjuvant therapies in the future. The intention of this study is as a pilot trial, primarily designed to provide un-biased data as a foundation for further research into this area. It is anticipated that the effect size observed in this trial will be useful to more appropriately power subsequent RCTs with the most effective dose of melatonin. In summary, MIART will be the first trial designed to determine a dose-response relationship of melatonin on biochemical and physiological markers of follicle health and also clinical pregnancy rates.

## Contributors:

The idea for the trial was conceived by SF, LR, and EW. SF was involved in research design and primary writing of study protocol and manuscript. TO was involved in the design and writing of the manuscript. LR and EW were involved in the trial design, writing, editing and approval of the final manuscript.

## Funding

Funding statement: This work is supported both financially and in-kind by the Monash IVF Research and Education Foundation who peer-reviewed this study prior to the approval of funding. In-kind and financial support was also afforded by The Department of Obstetrics and Gynaecology, Monash University and The Ritchie Centre, MIMR-PHI. No funding agency had a role in the design, implementation or analysis of this trial.

## Conflict of interest statement

SF is supported by an NHMRC Postgraduate Scholarship. No conflicts of interest are identified for SF, EW or TO. BV and LR are minority shareholders in Monash IVF. LR has received unconditional research and educational grants from MSD® and Merck Serono®. The trial sponsor had no influence on trial design, implementation, analysis or presentation.

## References

1. Kojo S. Vitamin C: basic metabolism and its function as an index of oxidative stress. *Curr Med Chem* 2004;11:1041-64.
2. Rahman K. Studies on free radicals, antioxidants, and co-factors. *Clin Interv Aging* 2007;2:219-36.
3. Bouayed J, Bohn T. Exogenous antioxidants - Double-edged swords in cellular redox state: Health beneficial effects at physiologic doses versus deleterious effects at high doses. *Oxid Med Cell Longev* 2010;3:228-37.
4. Valko M, Leibfritz D, Moncol J, Cronin M, Mazur M, Telser J. Free radicals and antioxidants in normal physiological functions and human disease. *Int J Biochem Cell Biol* 2007;39:44-84.

- 1 5. Tamura H, Takasaki A, Taketani T *et al*. The role of melatonin as an antioxidant in the follicle. *J*
- 2 *Ovarian Res* 2012;5.
- 3 6. Guerin P, El Mouatassim S, Menezo Y. Oxidative stress and protection against reactive oxygen
- 4 species in the pre-implantation embryo and its surroundings. *Hum Reprod Update* 2001;7:175-89.
- 5 7. Yoshida M, Ishigati K, Nagai T, Chikyu M, Pursel V. Glutathione concentration during maturation
- 6 and after fertilization in pig oocytes: relevance to the ability of oocytes to form male pronucleus. *Biol Reprod*
- 7 *1993;49:89-94*.
- 8 8. Fatehi A, Roelen B, Colenbrander B *et al*. Presence of cumulus cells during in vitro fertilization
- 9 protects the bovine oocyte against oxidative stress and improves first cleavage but does not affect further
- 10 development. *Zygote* 2005;13:177-85.
- 11 9. Zeng H, Ren Z, Yeung W *et al*. Low mitochondrial DNA and ATP contents contribute to the absence
- 12 of birefringent spindle imaged with PolScope in in vitro matured human oocytes. *Hum Reprod*
- 13 *2007;22:1681-6*.
- 14 10. Van Blerkom J, Davis P, Lee J. ATP content of human oocytes and developmental potential and
- 15 outcome after in-vitro fertilization and embryo transfer *Hum Reprod* 1995;10:415-24.
- 16 11. Espey L. Current status of the hypothesis that mammalian ovulation is comparable to an
- 17 inflammatory reaction. *Biol Reprod* 1994;50:233-8.
- 18 12. Tamura H, Takasaki A, Miwa I *et al*. Oxidative stress impairs oocyte quality and melatonin protects
- 19 oocytes from free radical damage and improves fertilization rate. *J Pineal Res* 2008;44:280-7.
- 20 13. Tamura H, Taketani T, Takasaki A, Sugino N. Influence of oxidative stress on oocyte quality and
- 21 protective role of melatonin as an antioxidant. In: *20th World Congress on Fertility and Sterility, IFFS 2010*.
- 22 Vol. 7. Munich, Germany: Journal fur Reproduktionsmedizin und Endokrinologie, 2010:366.
- 23 14. Reiter R, Rosales-Corral S, Manchester L, Tan D. Peripheral reproductive organ health and
- 24 melatonin: ready for prime time. *Int J Mol Sci* 2013;14:7231-72.
- 25 15. Lord T, Nixon B, Jones KT, Aitken RJ. Melatonin prevents postovulatory oocyte aging in the mouse
- 26 and extends the window for optimal fertilization in vitro. *Biol Reprod* 2013.
- 27 16. Wood S, Quinn A, Troupe S, Kingsland C, Lewis-Jones I. Seasonal variation in assisted conception
- 28 cycles and the influence of photoperiodism on outcome in in vitro fertilization cycles. *Hum Fertil*
- 29 *2006;9:223-9*.
- 30 17. Agarwal A, Gupta S, Sharma RK. Role of oxidative stress in female reproduction. *Reprod Biol*
- 31 *Endocrinol* 2005;3.
- 32 18. Srinivasan V, Spence W, Pandi-Perumal SR., Zakharia R, Bhatnagar K, Brzezinski A. Melatonin and
- 33 human reproduction: shedding light on the darkness hormone. *Gynecol Endocrinol* 2009;25:779-85.
- 34 19. Dholpuria S, Vyas S, Purohit GN, Pathak KML. Sonographic monitoring of early follicle growth
- 35 induced by melatonin implants in camels and the subsequent fertility. *J Ultrasound* 2012;15:135-41.
- 36 20. Abecia JA, Palacin I, Forcada F, Valares JA. The effect of melatonin treatment on the ovarian
- 37 response of ewes to the ram effect. *Domest Anim Endocrinol* 2006;31:52-62.
- 38 21. Rodriguez-Osorio N, Kim I, Wang H, Kaya A, Memili E. Melatonin increases cleavage rate of porcine
- 39 preimplantation embryos in vitro. *J Pineal Res* 2007;43:283-8.
- 40 22. Sanchez-Barcelo EJ, Mediavilla MD, Tan DX, Reiter RJ. Clinical uses of melatonin: Evaluation of
- 41 human trials. *Curr Med Chem* 2010;17:2070-95.
- 42 23. Ishizuka B, Kuribayashi Y, Murai K, Amemiya A, Itoh M. The effect of melatonin on in vitro
- 43 fertilization and embryo development in mice. *J Pineal Res* 2000;28:48-51.
- 44 24. Choi J, Park S, Lee E *et al*. Anti-apoptotic effect of melatonin on preimplantation development of
- 45 porcine parthenogenetic embryos. *Mol Reprod Dev* 2008;75:1127-35.
- 46 25. Kang J, Koo O, Kwon D *et al*. Effects of melatonin on in vitro maturation of porcine oocyte and
- 47 expression of melatonin receptor RNA in cumulus and granulosa cells. *J Pineal Res* 2009;46:22-8.
- 48 26. Wei D, Zhang C, Xie J *et al*. Supplementation with low concentrations of melatonin improves
- 49 nuclear maturation of human oocytes in vitro. *J Assist Reprod Genet* 2013;30:933-8.
- 50 27. Kim M, Park E, Kim H *et al*. Does supplementation of in-vitro culture medium with melatonin
- 51 improve IVF outcome in PCOS? *Reprod Biomed Online* 2013;26:22-9.
- 52
- 53
- 54
- 55
- 56
- 57
- 58
- 59
- 60

- 1  
2  
3  
4  
5  
6  
7  
8  
9  
10  
11  
12  
13  
14  
15  
16  
17  
18  
19  
20  
21  
22  
23  
24  
25  
26  
27  
28  
29  
30  
31  
32  
33  
34  
35  
36  
37  
38  
39  
40  
41  
42  
43  
44  
45  
46  
47  
48  
49  
50  
51  
52  
53  
54  
55  
56  
57  
58  
59  
60
28. Knapen M, Zusterzeel P, Peters W, Steegers E. Glutathione and glutathione-related enzymes in reproduction: a review. *Eur J Obstet Gynecol Reprod Biol* 1999;82:171-84.
  29. Eryilmaz O, Devran A, Sarikaya E, Aksakal F, Mollamahmutoglu L, Cicek N. Melatonin improves the oocyte and the embryo in IVF patients with sleep disturbances, but does not improve the sleeping problems. *J Assist Reprod Genet* 2011;28:815-20.
  30. Batioğlu A, Şahin U, Gürlek B, Öztürk N, Ünsal E. The efficacy of melatonin administration on oocyte quality. *Gynecol Endocrinol* 2012;28:91-3.
  31. Taketani T, Tamura H, Takasaki A *et al.* Protective role of melatonin in progesterone production by human luteal cells. *J Pineal Res* 2011;51:207-13.
  32. Manca M, Manunta M, Spezzigu A *et al.* Melatonin deprivation modifies follicle and corpora lutea growth dynamics in a sheep model (Epub ahead of print). *Reproduction* 2014.
  33. Baratta M, Tamanini C. Effect of melatonin on the in vitro secretion of progesterone and estradiol 17 beta by ovine granulosa cells. *Acta Endocrinol (Copenh)* 1992 127:366-70.
  34. Wallace J, Robinson J, Wigzell S, Aitken R. Effect of melatonin on the peripheral concentrations of LH and progesterone after oestrus, and on conception rate in ewes. *J Endocrinol* 1988 119:523-30.
  35. Zhang L, Chai M, Tian X *et al.* Effects of melatonin on superovulation and transgenic embryo transplantation in small-tailed han sheep (*Ovis aries*). *Neuro Endocrinol Lett* 2013;34:294-301.
  36. Rizzo P, Raffone E, Benedetto V. Effect of the treatment with myo-inositol plus folic acid plus melatonin in comparison with a treatment with myo-inositol plus folic acid on oocyte quality and pregnancy outcome in IVF cycles. A prospective, clinical trial. *EmbaseEuropean Review for Medical and Pharmacological Sciences* 2010;14:555-61.
  37. Nazzaro A, Salerno A, Marino S, Granato C, Pastore E. The addition of melatonin to myo-inositol plus folic acid improve oocyte quality and pregnancy outcome in IVF cycle. A prospective clinical trial. . In: 27th Annual Meeting of the European Society of Human Reproduction and Embryology, ESHRE. Vol. 26. Stockholm Sweden: EmbaseHuman Reproduction, 2011:i227-i8.
  38. Pacchiarotti A, Carlomagno G, Unfer V, Frati P, Pacchiarotti A, Prapas N. Role of Myo-inositol and melatonin supplementation in follicular fluid of IVF patients with polycystic ovarian syndrome: a randomized controlled trial. *ClinicalTrialsgov* 2013.
  39. Unfer V, Raffone E, Rizzo P, Buffo S. Effect of a supplementation with myo-inositol plus melatonin on oocyte quality in women who failed to conceive in previous in vitro fertilization cycles for poor oocyte quality: a prospective, longitudinal, cohort study. *Gynaecol Endocrinol* 2011;27:857-61.
  40. Hemadi M, Shokri S, Pourmatroud E, Moramezi F, Khodadai A. Follicular dynamic and immunoreactions of the vitrified ovarian graft after host treatment with variable regimens of melatonin. *Am J Reprod Immunol* 2012;67:401-12.
  41. Jahnke G, Marr M, Myers C, Wilson R, Travlos G, Price C. Maternal and developmental toxicity evaluation of melatonin administered orally to pregnant Sprague-Dawley rats. *Toxicol Sci* 1999;50:271-9.
  42. Gonciarz M, Gonciarz Z, Bielanski W *et al.* The effects of long-term melatonin treatment on plasma liver enzymes levels and plasma concentrations of lipids and melatonin in patients with nonalcoholic steatohepatitis: a pilot study. *J Physiol Pharmacol* 2012;63:35-40.
  43. de Lourdes V. Seabra M, Bignotto M, Pinto Jr L, Tufik S. Randomized, double-blind clinical trial, controlled with placebo, of the toxicology of chronic melatonin treatment. *J Pineal Res* 2000;29:193-200.
  44. Goldberg-Stern H, Oren H, Peled N, Garty B. Effect of melatonin on seizure frequency in intractable epilepsy: a pilot study. *J Child Neurol* 2012;27:1524-8.
  45. Del Fabbro E, Dev R, Hui D, Palmer L, Bruera E. Effects of melatonin on appetite and other symptoms in patients with advanced cancer and cachexia: a double-blind placebo-controlled trial. *J Clin Oncol* 2013;31:1271-6.
  46. Voordouw B, Euser R, Verdonk R *et al.* Melatonin and melatonin-progestin combinations alter pituitary-ovarian function in women and can inhibit ovulation. *J Clin Endocrinol Metab* 1992;74:108-17.
  47. Weaver D. Reproductive safety of melatonin: a "wonder drug" to wonder about. *J Biol Rhythms* 1997;12:682.

- 1  
2  
3  
4  
5  
6  
7  
8  
9  
10  
11  
12  
13  
14  
15  
16  
17  
18  
19  
20  
21  
22  
23  
24  
25  
26  
27  
28  
29  
30  
31  
32  
33  
34  
35  
36  
37  
38  
39  
40  
41  
42  
43  
44  
45  
46  
47  
48  
49  
50  
51  
52  
53  
54  
55  
56  
57  
58  
59  
60
48. . Centers for Disease Control and Prevention, American Society for Reproductive Medicine, Society for Assisted Reproductive Technology. 2011 Assisted reproductive technology fertility clinic success rates report. In. Atlanta (GA): US Dept of Health and Human Services, 2013.
49. Sampaio R, Conceição S, Miranda M, Sampaio Lde F, Ohashi O. MT3 melatonin binding site, MT1 and MT2 melatonin receptors are present in oocyte, but only MT1 is present in bovine blastocyst produced in vitro. *Reprod Biol Endocrinol* 2012;10.
50. Ciotta L, Stracquadanio M, Pagano I, Carbonaro A, Palumbo M, Gulino F. Effects of myo-inositol supplementation on oocyte's quality in PCOS patients: a double blind trial. *Eur Rev Med Pharmacol Sci* 2011;15:509-14.
51. Nishihara T, Hashimoto S, Ito K *et al*. Oral melatonin supplementation improves oocyte and embryo quality in women undergoing in vitro fertilization-embryo transfer. *Gynecol Endocrinol* 2014;30:359-62.
52. Chan A, Tetzlaff J, Gøtzsche P *et al*. SPIRIT 2013 explanation and elaboration: guidance for protocols of clinical trials. *BMJ* 2013;346.
53. Clarke JF, van Rumste MM, Farquhar CM, Johnson NP, Mol BW, Herbison P. Measuring outcomes in fertility trials: can we rely on clinical pregnancy rates? *Fertil Steril* 2010;94:1647-51.
54. Altman D, Bland J. Treatment allocation by minimisation. *BMJ* 2005;330:843.
55. Mills E, Chan A, Wu P, Vail A, Guyatt G, Altman D. Design, analysis, and presentation of crossover trials. *Trials* 2009;10.
56. Piantadosi S. *Clinical Trials: A Methodologic Perspective*. Wiley Series in Probability and Statistics. 2nd ed: John Wiley & Sons, 2013.
57. Waldhauser F, Waldhauser M, Lieberman H, Deng M, Lynch H, Wurtmann R. Bioavailability of oral melatonin in humans. *Neuroendocrinology* 1984;39:307-13.

## Figure Legends

### Table 1: Clinical Secondary Outcomes

OHSS: Ovarian Hyperstimulation syndrome; hCG: human chorionic gonadotrophin; 8-OHdg: 8-hydroxy- 2'-deoxyguanosine

<sup>a</sup>Reyner L, Horne J. Falling asleep whilst driving: are drivers aware of prior sleepiness? Int J Legal Med 1998;111:120-3

### Figure 1: Participant timeline schematic - first cycle

<sup>a</sup>Placebo, melatonin 2mg twice daily, melatonin 4mg twice daily, melatonin 8mg twice daily

hCG: human chorionic gonadotrophin; 8-OHdg: 8-hydroxy- 2'-deoxyguanosine

Note: Patients who are not pregnant after their first cycle will be offered a second cycle with a different trial medication (Figure 2)

### Figure 2: Participant timeline schematic - second cycle in those not pregnant after their first cycle

<sup>a</sup> For participants who do not become pregnant in their first cycle, each will be offered allocation to the next treatment arm for their second cycle (ie. A will be allocated to B, B to C, C to D and D to A)

ET: embryo transfer; hCG: human chorionic gonadotrophin



1  
2  
3  
4  
5  
6  
7  
8  
9  
10  
11  
12  
13  
14  
15  
16  
17  
18  
19  
20  
21  
22  
23  
24  
25  
26  
27  
28  
29  
30  
31  
32  
33  
34  
35  
36  
37  
38  
39  
40  
41  
42  
43  
44  
45  
46  
47  
48  
49  
50  
51  
52  
53  
54  
55  
56  
57  
58  
59  
60

|                                                  | Study Period |                         |                 |    |    |           |       |
|--------------------------------------------------|--------------|-------------------------|-----------------|----|----|-----------|-------|
|                                                  | Enrolment    | Trial medication begins | Post allocation |    |    | Close out |       |
| Timepoint (days)                                 | -7           | 0                       | 8-10            | 14 | 19 | 68        | 299   |
| <b>ENROLMENT</b>                                 |              |                         |                 |    |    |           |       |
| Eligibility Screen                               | x            |                         |                 |    |    |           |       |
| Informed Consent                                 | x            |                         |                 |    |    |           |       |
| Allocation                                       | x            |                         |                 |    |    |           |       |
| <b>INTERVENTIONS</b>                             |              |                         |                 |    |    |           |       |
| Trial Medication <sup>a</sup>                    |              | x                       | —————           | x  |    |           |       |
| <b>ASSESSMENTS</b>                               |              |                         |                 |    |    |           |       |
| Baseline blood tests                             | x            |                         |                 |    |    |           |       |
| Blood tests after treatment                      |              |                         |                 |    | x  |           |       |
| Follicular fluid melatonin and 8-OHdg            |              |                         |                 |    | x  |           |       |
| Measurement of follicular and uterine blood flow |              |                         | x               |    |    |           |       |
| Oocyte assessments                               |              |                         |                 |    | x  |           |       |
| Embryo assessments                               |              |                         |                 |    | x  | —————     | x     |
| Sleepiness scores                                |              | x                       | —————           | x  |    |           |       |
| Pregnancy complication rates and outcomes        |              |                         |                 |    |    |           | x     |
| Followup hCG                                     |              |                         |                 |    |    | x         | ————— |

Figure 1: Participant timeline schematic - first cycle

<sup>a</sup> Placebo, melatonin 2mg twice daily, melatonin 4mg twice daily, melatonin 8mg twice daily

hCG: human chorionic gonadotrophin; 8-OHdg: 8-hydroxy- 2'-deoxyguanosine

Note: Patients who are not pregnant after their first cycle will be offered a second cycle with a different trial medication (Figure 2)

296x419mm (300 x 300 DPI)



1  
2  
3  
4  
5  
6  
7  
8  
9  
10  
11  
12  
13  
14  
15  
16  
17  
18  
19  
20  
21  
22  
23  
24  
25  
26  
27  
28  
29  
30  
31  
32  
33  
34  
35  
36  
37  
38  
39  
40  
41  
42  
43  
44  
45  
46  
47  
48  
49  
50  
51  
52  
53  
54  
55  
56  
57  
58  
59  
60

| Timepoint (days)                          | Study Period                      |                                             |                   |    |       |           |       |   |
|-------------------------------------------|-----------------------------------|---------------------------------------------|-------------------|----|-------|-----------|-------|---|
|                                           | Confirmation of pregnancy failure | Second trial medication begins <sup>a</sup> | Post reallocation |    |       | Close out |       |   |
|                                           |                                   | 0                                           | 8-10              | 14 | 19    | 68        | 299   |   |
| <b>INTERVENTIONS</b>                      |                                   |                                             |                   |    |       |           |       |   |
| Offer reallocation                        | x                                 |                                             |                   |    |       |           |       |   |
| Trial Medication <sup>a</sup>             |                                   | x                                           | —————             | x  |       |           |       |   |
| <b>ASSESSMENTS</b>                        |                                   |                                             |                   |    |       |           |       |   |
| Oocyte assessments                        |                                   |                                             |                   | x  |       |           |       |   |
| Embryo assessments                        |                                   |                                             |                   | x  | ————— | x         |       |   |
| Sleepiness scores                         |                                   | x                                           | —————             | x  |       |           |       |   |
| Pregnancy complication rates and outcomes |                                   |                                             |                   |    |       | x         | ————— | x |
| Followup hCG                              |                                   |                                             |                   |    | x     | —————     | x     |   |

Figure 2: Participant timeline schematic - second cycle in those not pregnant after their first cycle  
<sup>a</sup> For participants who do not become pregnant in their first cycle, each will be offered allocation to the next treatment arm for their second cycle (ie. A will be allocated to B, B to C, C to D and D to A)  
 ET: embryo transfer; hCG: human chorionic gonadotrophin  
 296x419mm (300 x 300 DPI)

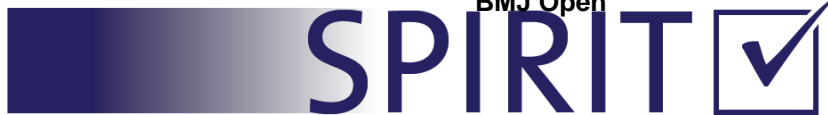

## STANDARD PROTOCOL ITEMS: RECOMMENDATIONS FOR INTERVENTIONAL TRIALS

## SPIRIT 2013 Checklist: Recommended items to address in a clinical trial protocol and related documents\*

| Page(s)                                                   | Section/item               | ItemNo | Description                                                                                                                                                                                                                                                                              |
|-----------------------------------------------------------|----------------------------|--------|------------------------------------------------------------------------------------------------------------------------------------------------------------------------------------------------------------------------------------------------------------------------------------------|
| <b>Administrative information</b>                         |                            |        |                                                                                                                                                                                                                                                                                          |
| 1                                                         | Title                      | 1      | Descriptive title identifying the study design, population, interventions, and, if applicable, trial acronym                                                                                                                                                                             |
| 3                                                         | Trial registration         | 2a     | Trial identifier and registry name. If not yet registered, name of intended registry                                                                                                                                                                                                     |
| 3                                                         |                            | 2b     | All items from the World Health Organization Trial Registration Data Set                                                                                                                                                                                                                 |
| 3                                                         | Protocol version           | 3      | Date and version identifier                                                                                                                                                                                                                                                              |
| 13                                                        | Funding                    | 4      | Sources and types of financial, material, and other support                                                                                                                                                                                                                              |
| 1,2,13                                                    | Roles and responsibilities | 5a     | Names, affiliations, and roles of protocol contributors                                                                                                                                                                                                                                  |
| 2                                                         |                            | 5b     | Name and contact information for the trial sponsor                                                                                                                                                                                                                                       |
| 13                                                        |                            | 5c     | Role of study sponsor and funders, if any, in study design; collection, management, analysis, and interpretation of data; writing of the report; and the decision to submit the report for publication, including whether they will have ultimate authority over any of these activities |
| 11                                                        |                            | 5d     | Composition, roles, and responsibilities of the coordinating centre, steering committee, endpoint adjudication committee, data management team, and other individuals or groups overseeing the trial, if applicable (see Item 21a for data monitoring committee)                         |
| <b>Introduction</b>                                       |                            |        |                                                                                                                                                                                                                                                                                          |
| 5-7                                                       | Background and rationale   | 6a     | Description of research question and justification for undertaking the trial, including summary of relevant studies (published and unpublished) examining benefits and harms for each intervention                                                                                       |
| 5-7                                                       |                            | 6b     | Explanation for choice of comparators                                                                                                                                                                                                                                                    |
| 7                                                         | Objectives                 | 7      | Specific objectives or hypotheses                                                                                                                                                                                                                                                        |
| 7-11                                                      | Trial design               | 8      | Description of trial design including type of trial (eg, parallel group, crossover, factorial, single group), allocation ratio, and framework (eg, superiority, equivalence, noninferiority, exploratory)                                                                                |
| <b>Methods: Participants, interventions, and outcomes</b> |                            |        |                                                                                                                                                                                                                                                                                          |
| 7                                                         | Study setting              | 9      | Description of study settings (eg, community clinic, academic hospital) and list of countries where data will be collected. Reference to where list of study sites can be obtained                                                                                                       |

|    |           |                      |     |                                                                                                                                                                                                                                                                                                                                                                                |
|----|-----------|----------------------|-----|--------------------------------------------------------------------------------------------------------------------------------------------------------------------------------------------------------------------------------------------------------------------------------------------------------------------------------------------------------------------------------|
| 1  | 8-9       | Eligibility criteria | 10  | Inclusion and exclusion criteria for participants. If applicable, eligibility criteria for study centres and individuals who will perform the interventions (eg, surgeons, psychotherapists)                                                                                                                                                                                   |
| 2  |           |                      |     |                                                                                                                                                                                                                                                                                                                                                                                |
| 3  |           |                      |     |                                                                                                                                                                                                                                                                                                                                                                                |
| 4  | 7-8       | Interventions        | 11a | Interventions for each group with sufficient detail to allow replication, including how and when they will be administered                                                                                                                                                                                                                                                     |
| 5  |           |                      |     |                                                                                                                                                                                                                                                                                                                                                                                |
| 6  |           |                      |     |                                                                                                                                                                                                                                                                                                                                                                                |
| 7  |           |                      |     |                                                                                                                                                                                                                                                                                                                                                                                |
| 8  | 11        |                      | 11b | Criteria for discontinuing or modifying allocated interventions for a given trial participant (eg, drug dose change in response to harms, participant request, or improving/worsening disease)                                                                                                                                                                                 |
| 9  |           |                      |     |                                                                                                                                                                                                                                                                                                                                                                                |
| 10 |           |                      |     |                                                                                                                                                                                                                                                                                                                                                                                |
| 11 |           |                      |     |                                                                                                                                                                                                                                                                                                                                                                                |
| 12 | 10        |                      | 11c | Strategies to improve adherence to intervention protocols, and any procedures for monitoring adherence (eg, drug tablet return, laboratory tests)                                                                                                                                                                                                                              |
| 13 |           |                      |     |                                                                                                                                                                                                                                                                                                                                                                                |
| 14 |           |                      |     |                                                                                                                                                                                                                                                                                                                                                                                |
| 15 |           |                      |     |                                                                                                                                                                                                                                                                                                                                                                                |
| 16 | 9         |                      | 11d | Relevant concomitant care and interventions that are permitted or prohibited during the trial                                                                                                                                                                                                                                                                                  |
| 17 |           |                      |     |                                                                                                                                                                                                                                                                                                                                                                                |
| 18 |           |                      |     |                                                                                                                                                                                                                                                                                                                                                                                |
| 19 | 8, Table  | Outcomes             | 12  | Primary, secondary, and other outcomes, including the specific measurement variable (eg, systolic blood pressure), analysis metric (eg, change from baseline, final value, time to event), method of aggregation (eg, median, proportion), and time point for each outcome. Explanation of the clinical relevance of chosen efficacy and harm outcomes is strongly recommended |
| 20 |           |                      |     |                                                                                                                                                                                                                                                                                                                                                                                |
| 21 | 1         |                      |     |                                                                                                                                                                                                                                                                                                                                                                                |
| 22 |           |                      |     |                                                                                                                                                                                                                                                                                                                                                                                |
| 23 |           |                      |     |                                                                                                                                                                                                                                                                                                                                                                                |
| 24 |           |                      |     |                                                                                                                                                                                                                                                                                                                                                                                |
| 25 |           |                      |     |                                                                                                                                                                                                                                                                                                                                                                                |
| 26 | Fig 1 and | Participant timeline | 13  | Time schedule of enrolment, interventions (including any run-ins and washouts), assessments, and visits for participants. A schematic diagram is highly recommended (see Figure)                                                                                                                                                                                               |
| 27 |           |                      |     |                                                                                                                                                                                                                                                                                                                                                                                |
| 28 | 2         |                      |     |                                                                                                                                                                                                                                                                                                                                                                                |
| 29 |           |                      |     |                                                                                                                                                                                                                                                                                                                                                                                |
| 30 |           |                      |     |                                                                                                                                                                                                                                                                                                                                                                                |
| 31 | 8         | Sample size          | 14  | Estimated number of participants needed to achieve study objectives and how it was determined, including clinical and statistical assumptions supporting any sample size calculations                                                                                                                                                                                          |
| 32 |           |                      |     |                                                                                                                                                                                                                                                                                                                                                                                |
| 33 |           |                      |     |                                                                                                                                                                                                                                                                                                                                                                                |
| 34 |           |                      |     |                                                                                                                                                                                                                                                                                                                                                                                |
| 35 | 9-10      | Recruitment          | 15  | Strategies for achieving adequate participant enrolment to reach target sample size                                                                                                                                                                                                                                                                                            |
| 36 |           |                      |     |                                                                                                                                                                                                                                                                                                                                                                                |
| 37 |           |                      |     |                                                                                                                                                                                                                                                                                                                                                                                |
| 38 |           |                      |     |                                                                                                                                                                                                                                                                                                                                                                                |

#### Methods: Assignment of interventions (for controlled trials)

##### Allocation:

|    |    |                                  |     |                                                                                                                                                                                                                                                                                                                                                          |
|----|----|----------------------------------|-----|----------------------------------------------------------------------------------------------------------------------------------------------------------------------------------------------------------------------------------------------------------------------------------------------------------------------------------------------------------|
| 42 |    |                                  |     |                                                                                                                                                                                                                                                                                                                                                          |
| 43 | 10 | Sequence generation              | 16a | Method of generating the allocation sequence (eg, computer-generated random numbers), and list of any factors for stratification. To reduce predictability of a random sequence, details of any planned restriction (eg, blocking) should be provided in a separate document that is unavailable to those who enrol participants or assign interventions |
| 44 |    |                                  |     |                                                                                                                                                                                                                                                                                                                                                          |
| 45 |    |                                  |     |                                                                                                                                                                                                                                                                                                                                                          |
| 46 |    |                                  |     |                                                                                                                                                                                                                                                                                                                                                          |
| 47 |    |                                  |     |                                                                                                                                                                                                                                                                                                                                                          |
| 48 |    |                                  |     |                                                                                                                                                                                                                                                                                                                                                          |
| 49 |    |                                  |     |                                                                                                                                                                                                                                                                                                                                                          |
| 50 | 10 | Allocation concealment mechanism | 16b | Mechanism of implementing the allocation sequence (eg, central telephone; sequentially numbered, opaque, sealed envelopes), describing any steps to conceal the sequence until interventions are assigned                                                                                                                                                |
| 51 |    |                                  |     |                                                                                                                                                                                                                                                                                                                                                          |
| 52 |    |                                  |     |                                                                                                                                                                                                                                                                                                                                                          |
| 53 |    |                                  |     |                                                                                                                                                                                                                                                                                                                                                          |
| 54 | 10 | Implementation                   | 16c | Who will generate the allocation sequence, who will enrol participants, and who will assign participants to interventions                                                                                                                                                                                                                                |
| 55 |    |                                  |     |                                                                                                                                                                                                                                                                                                                                                          |
| 56 |    |                                  |     |                                                                                                                                                                                                                                                                                                                                                          |
| 57 |    |                                  |     |                                                                                                                                                                                                                                                                                                                                                          |
| 58 | 10 | Blinding (masking)               | 17a | Who will be blinded after assignment to interventions (eg, trial participants, care providers, outcome assessors, data analysts), and how                                                                                                                                                                                                                |
| 59 |    |                                  |     |                                                                                                                                                                                                                                                                                                                                                          |
| 60 |    |                                  |     |                                                                                                                                                                                                                                                                                                                                                          |
|    | 10 |                                  | 17b | If blinded, circumstances under which unblinding is permissible, and procedure for revealing a participant's allocated intervention during the trial                                                                                                                                                                                                     |

**Methods: Data collection, management, and analysis**

|    |    |                         |     |                                                                                                                                                                                                                                                                                                                                                                                                              |
|----|----|-------------------------|-----|--------------------------------------------------------------------------------------------------------------------------------------------------------------------------------------------------------------------------------------------------------------------------------------------------------------------------------------------------------------------------------------------------------------|
| 1  |    |                         |     |                                                                                                                                                                                                                                                                                                                                                                                                              |
| 2  | 12 | Data collection methods | 18a | Plans for assessment and collection of outcome, baseline, and other trial data, including any related processes to promote data quality (eg, duplicate measurements, training of assessors) and a description of study instruments (eg, questionnaires, laboratory tests) along with their reliability and validity, if known. Reference to where data collection forms can be found, if not in the protocol |
| 3  |    |                         |     |                                                                                                                                                                                                                                                                                                                                                                                                              |
| 4  |    |                         |     |                                                                                                                                                                                                                                                                                                                                                                                                              |
| 5  |    |                         |     |                                                                                                                                                                                                                                                                                                                                                                                                              |
| 6  |    |                         |     |                                                                                                                                                                                                                                                                                                                                                                                                              |
| 7  |    |                         |     |                                                                                                                                                                                                                                                                                                                                                                                                              |
| 8  |    |                         |     |                                                                                                                                                                                                                                                                                                                                                                                                              |
| 9  |    |                         |     |                                                                                                                                                                                                                                                                                                                                                                                                              |
| 10 |    |                         |     |                                                                                                                                                                                                                                                                                                                                                                                                              |
| 11 | 10 |                         | 18b | Plans to promote participant retention and complete follow-up, including list of any outcome data to be collected for participants who discontinue or deviate from intervention protocols                                                                                                                                                                                                                    |
| 12 |    |                         |     |                                                                                                                                                                                                                                                                                                                                                                                                              |
| 13 |    |                         |     |                                                                                                                                                                                                                                                                                                                                                                                                              |
| 14 |    |                         |     |                                                                                                                                                                                                                                                                                                                                                                                                              |
| 15 | 12 | Data management         | 19  | Plans for data entry, coding, security, and storage, including any related processes to promote data quality (eg, double data entry; range checks for data values). Reference to where details of data management procedures can be found, if not in the protocol                                                                                                                                            |
| 16 |    |                         |     |                                                                                                                                                                                                                                                                                                                                                                                                              |
| 17 |    |                         |     |                                                                                                                                                                                                                                                                                                                                                                                                              |
| 18 |    |                         |     |                                                                                                                                                                                                                                                                                                                                                                                                              |
| 19 |    |                         |     |                                                                                                                                                                                                                                                                                                                                                                                                              |
| 20 |    |                         |     |                                                                                                                                                                                                                                                                                                                                                                                                              |
| 21 | 11 | Statistical methods     | 20a | Statistical methods for analysing primary and secondary outcomes. Reference to where other details of the statistical analysis plan can be found, if not in the protocol                                                                                                                                                                                                                                     |
| 22 |    |                         |     |                                                                                                                                                                                                                                                                                                                                                                                                              |
| 23 |    |                         |     |                                                                                                                                                                                                                                                                                                                                                                                                              |
| 24 |    |                         |     |                                                                                                                                                                                                                                                                                                                                                                                                              |
| 25 |    |                         |     |                                                                                                                                                                                                                                                                                                                                                                                                              |
| 26 | 11 |                         | 20b | Methods for any additional analyses (eg, subgroup and adjusted analyses)                                                                                                                                                                                                                                                                                                                                     |
| 27 |    |                         |     |                                                                                                                                                                                                                                                                                                                                                                                                              |
| 28 | 11 |                         | 20c | Definition of analysis population relating to protocol non-adherence (eg, as randomised analysis), and any statistical methods to handle missing data (eg, multiple imputation)                                                                                                                                                                                                                              |
| 29 |    |                         |     |                                                                                                                                                                                                                                                                                                                                                                                                              |
| 30 |    |                         |     |                                                                                                                                                                                                                                                                                                                                                                                                              |
| 31 |    |                         |     |                                                                                                                                                                                                                                                                                                                                                                                                              |

**Methods: Monitoring**

|    |    |                          |     |                                                                                                                                                                                                                                                                                                                                       |
|----|----|--------------------------|-----|---------------------------------------------------------------------------------------------------------------------------------------------------------------------------------------------------------------------------------------------------------------------------------------------------------------------------------------|
| 32 |    |                          |     |                                                                                                                                                                                                                                                                                                                                       |
| 33 |    |                          |     |                                                                                                                                                                                                                                                                                                                                       |
| 34 | 11 | Data monitoring          | 21a | Composition of data monitoring committee (DMC); summary of its role and reporting structure; statement of whether it is independent from the sponsor and competing interests; and reference to where further details about its charter can be found, if not in the protocol. Alternatively, an explanation of why a DMC is not needed |
| 35 |    |                          |     |                                                                                                                                                                                                                                                                                                                                       |
| 36 |    |                          |     |                                                                                                                                                                                                                                                                                                                                       |
| 37 |    |                          |     |                                                                                                                                                                                                                                                                                                                                       |
| 38 |    |                          |     |                                                                                                                                                                                                                                                                                                                                       |
| 39 |    |                          |     |                                                                                                                                                                                                                                                                                                                                       |
| 40 |    |                          |     |                                                                                                                                                                                                                                                                                                                                       |
| 41 | 11 |                          | 21b | Description of any interim analyses and stopping guidelines, including who will have access to these interim results and make the final decision to terminate the trial                                                                                                                                                               |
| 42 |    |                          |     |                                                                                                                                                                                                                                                                                                                                       |
| 43 |    |                          |     |                                                                                                                                                                                                                                                                                                                                       |
| 44 |    |                          |     |                                                                                                                                                                                                                                                                                                                                       |
| 45 |    |                          |     |                                                                                                                                                                                                                                                                                                                                       |
| 46 | 11 | Harms                    | 22  | Plans for collecting, assessing, reporting, and managing solicited and spontaneously reported adverse events and other unintended effects of trial interventions or trial conduct                                                                                                                                                     |
| 47 |    |                          |     |                                                                                                                                                                                                                                                                                                                                       |
| 48 |    |                          |     |                                                                                                                                                                                                                                                                                                                                       |
| 49 |    |                          |     |                                                                                                                                                                                                                                                                                                                                       |
| 50 |    |                          |     |                                                                                                                                                                                                                                                                                                                                       |
| 51 | 11 | Auditing                 | 23  | Frequency and procedures for auditing trial conduct, if any, and whether the process will be independent from investigators and the sponsor                                                                                                                                                                                           |
| 52 |    |                          |     |                                                                                                                                                                                                                                                                                                                                       |
| 53 |    |                          |     |                                                                                                                                                                                                                                                                                                                                       |
| 54 |    |                          |     |                                                                                                                                                                                                                                                                                                                                       |
| 55 |    |                          |     |                                                                                                                                                                                                                                                                                                                                       |
| 56 | 12 | Research ethics approval | 24  | Plans for seeking research ethics committee/institutional review board (REC/IRB) approval                                                                                                                                                                                                                                             |
| 57 |    |                          |     |                                                                                                                                                                                                                                                                                                                                       |
| 58 |    |                          |     |                                                                                                                                                                                                                                                                                                                                       |
| 59 | 11 | Protocol amendments      | 25  | Plans for communicating important protocol modifications (eg, changes to eligibility criteria, outcomes, analyses) to relevant parties (eg, investigators, REC/IRBs, trial participants, trial registries, journals, regulators)                                                                                                      |
| 60 |    |                          |     |                                                                                                                                                                                                                                                                                                                                       |

|    |           |                               |     |                                                                                                                                                                                                                                                                                     |
|----|-----------|-------------------------------|-----|-------------------------------------------------------------------------------------------------------------------------------------------------------------------------------------------------------------------------------------------------------------------------------------|
| 1  | 10        | Consent or assent             | 26a | Who will obtain informed consent or assent from potential trial participants or authorised surrogates, and how (see Item 32)                                                                                                                                                        |
| 2  |           |                               |     |                                                                                                                                                                                                                                                                                     |
| 3  | N/A       |                               | 26b | Additional consent provisions for collection and use of participant data and biological specimens in ancillary studies, if applicable                                                                                                                                               |
| 4  |           |                               |     |                                                                                                                                                                                                                                                                                     |
| 5  |           |                               |     |                                                                                                                                                                                                                                                                                     |
| 6  | 12        | Confidentiality               | 27  | How personal information about potential and enrolled participants will be collected, shared, and maintained in order to protect confidentiality before, during, and after the trial                                                                                                |
| 7  |           |                               |     |                                                                                                                                                                                                                                                                                     |
| 8  |           |                               |     |                                                                                                                                                                                                                                                                                     |
| 9  |           |                               |     |                                                                                                                                                                                                                                                                                     |
| 10 |           |                               |     |                                                                                                                                                                                                                                                                                     |
| 11 | 13        | Declaration of interests      | 28  | Financial and other competing interests for principal investigators for the overall trial and each study site                                                                                                                                                                       |
| 12 |           |                               |     |                                                                                                                                                                                                                                                                                     |
| 13 |           |                               |     |                                                                                                                                                                                                                                                                                     |
| 14 | 12        | Access to data                | 29  | Statement of who will have access to the final trial dataset, and disclosure of contractual agreements that limit such access for investigators                                                                                                                                     |
| 15 |           |                               |     |                                                                                                                                                                                                                                                                                     |
| 16 |           |                               |     |                                                                                                                                                                                                                                                                                     |
| 17 |           |                               |     |                                                                                                                                                                                                                                                                                     |
| 18 | 11        | Ancillary and post-trial care | 30  | Provisions, if any, for ancillary and post-trial care, and for compensation to those who suffer harm from trial participation                                                                                                                                                       |
| 19 |           |                               |     |                                                                                                                                                                                                                                                                                     |
| 20 |           |                               |     |                                                                                                                                                                                                                                                                                     |
| 21 | 12        | Dissemination policy          | 31a | Plans for investigators and sponsor to communicate trial results to participants, healthcare professionals, the public, and other relevant groups (eg, via publication, reporting in results databases, or other data sharing arrangements), including any publication restrictions |
| 22 |           |                               |     |                                                                                                                                                                                                                                                                                     |
| 23 |           |                               |     |                                                                                                                                                                                                                                                                                     |
| 24 |           |                               |     |                                                                                                                                                                                                                                                                                     |
| 25 |           |                               |     |                                                                                                                                                                                                                                                                                     |
| 26 |           |                               |     |                                                                                                                                                                                                                                                                                     |
| 27 | 12        |                               | 31b | Authorship eligibility guidelines and any intended use of professional writers                                                                                                                                                                                                      |
| 28 |           |                               |     |                                                                                                                                                                                                                                                                                     |
| 29 | 12        |                               | 31c | Plans, if any, for granting public access to the full protocol, participant-level dataset, and statistical code                                                                                                                                                                     |
| 30 |           |                               |     |                                                                                                                                                                                                                                                                                     |
| 31 |           |                               |     |                                                                                                                                                                                                                                                                                     |
| 32 |           |                               |     |                                                                                                                                                                                                                                                                                     |
| 33 |           | <b>Appendices</b>             |     |                                                                                                                                                                                                                                                                                     |
| 34 | Available | Informed consent materials    | 32  | Model consent form and other related documentation given to participants and authorised surrogates                                                                                                                                                                                  |
| 35 | on        |                               |     |                                                                                                                                                                                                                                                                                     |
| 36 | request   |                               |     |                                                                                                                                                                                                                                                                                     |
| 37 |           |                               |     |                                                                                                                                                                                                                                                                                     |
| 38 |           |                               |     |                                                                                                                                                                                                                                                                                     |
| 39 | 12        | Biological specimens          | 33  | Plans for collection, laboratory evaluation, and storage of biological specimens for genetic or molecular analysis in the current trial and for future use in ancillary studies, if applicable                                                                                      |
| 40 |           |                               |     |                                                                                                                                                                                                                                                                                     |
| 41 |           |                               |     |                                                                                                                                                                                                                                                                                     |
| 42 |           |                               |     |                                                                                                                                                                                                                                                                                     |

43 \*It is strongly recommended that this checklist be read in conjunction with the SPIRIT 2013 Explanation & Elaboration for important  
 44 clarification on the items. Amendments to the protocol should be tracked and dated. The SPIRIT checklist is copyrighted by the SPIRIT  
 45 Group under the Creative Commons "[Attribution-NonCommercial-NoDerivs 3.0 Unported](https://creativecommons.org/licenses/by-nc-nd/3.0/)" license.  
 46  
 47  
 48  
 49  
 50  
 51  
 52  
 53  
 54  
 55  
 56  
 57  
 58  
 59  
 60
